# Supplementary material for: Responses of Transgenic Melatonin-Enriched Goats on LPS Stimulation and the Proteogenomic Profiles of Their PBMCs
Source: MDPI journal article supplement (doi:10.3390/ijms19082406), 2018-08-15
Supplement: s1 [file s1]

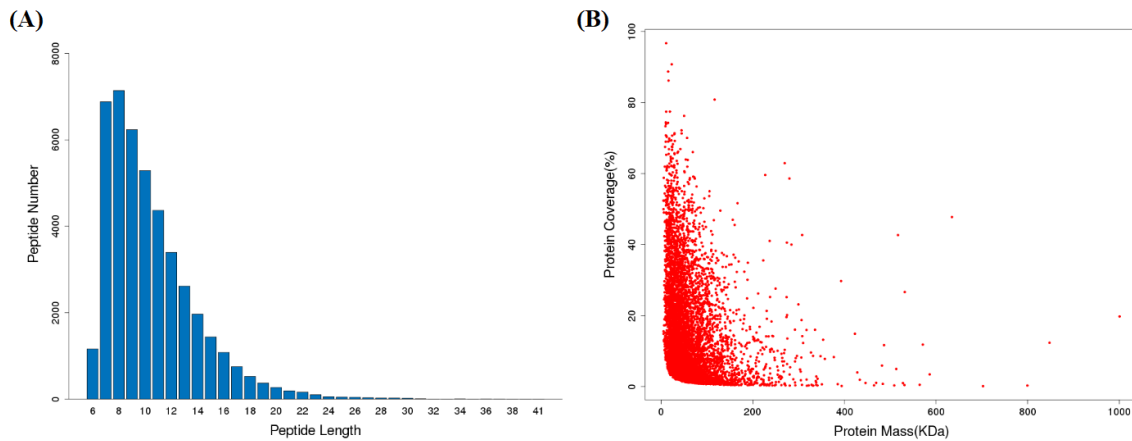

**Figure S1.** Statistics of peptide length distribution and protein molecular weight distribution. (A) Peptide length distribution profile, abscissa: peptide length; ordinate: peptide number. (B) Molecular weight and coverage profile, abscissa: protein mass (KDa), ordinate: protein coverage (%).

**Table S1.** 119 overlapping differential expression proteins identified by Group A (Trans vs WT) and Group B (WT + MT vs. WT).

| ID           | FoldChange                    | Log2FoldChange                  |
|--------------|-------------------------------|---------------------------------|
| RNF14        | 11.0144569242,9.65185976746   | 3.46132645855,3.27080695469     |
| LOC106503742 | 1.36711707452,1.35251520209   | 0.451136794954,0.435644809843   |
| AGL          | 0.741325859732,0.764207144826 | -0.43182025697,-0.387964348895  |
| SYTL1        | 0.570309185394,0.575287660282 | -0.810183825961,-0.797644569635 |
| LOC102191717 | 0.673446495311,0.680342219495 | -0.570364765407,-0.555667474738 |
| PDCD11       | 0.696408705186,0.761861987582 | -0.521993857938,-0.392398419826 |
| NAPSA        | 1.47121798042,1.30155924167   | 0.557011016798,0.380240978833   |
| LOC102181771 | 0.535216627869,0.515842194263 | -0.901805157212,-0.954998309034 |
| RETN         | 0.477973765388,0.491581715782 | -1.06499665991,-1.02449683874   |
| MRPL47       | 1.30963253668,1.4302417578    | 0.389162069872,0.51625903043    |
| TTYH3        | 0.709756752251,0.741155087849 | -0.494603425834,-0.432152634597 |
| FMO2         | 1.56952082785,1.46097454459   | 0.650324173894,0.546931041445   |
| ATPAF1       | 0.551123609251,0.453705932296 | -0.859552163653,-1.14017057155  |
| LIPE         | 0.731676570213,0.709749876258 | -0.450722033352,-0.494617402466 |
| RFLNB        | 0.61005866975,0.658224630367  | -0.712980100594,-0.60334808264  |
| LOC102179937 | 2.92170640536,5.03664021198   | 1.54681121277,2.33246167701     |
| ABLIM1       | 6.99091944746,7.63922482476   | 2.80548221169,2.93342625106     |
| ABHD2        | 0.532411250139,0.578424431799 | -0.909387038385,-0.78979960399  |
| HTATIP2      | 0.416566041711,0.421329039851 | -1.26338285861,-1.24698073867   |
| OSBPL10      | 0.660476587578,0.689398163308 | -0.598420672831,-0.5365906398   |
| XAF1         | 0.661925546559,0.684518595996 | -0.595259143188,-0.546838359852 |
| CXCL8        | 2.35047820646,1.95206376759   | 1.23295430398,0.965000181837    |
| TLR2         | 0.613864003867,0.717322245446 | -0.704009020201,-0.479306722869 |
| FABP5        | 0.741054544827,0.720366046099 | -0.432348359839,-0.473197912365 |
| ADGRG3       | 0.572529317381,0.591509222827 | -0.804578524023,-0.757527431609 |
| ATP8B4       | 0.536700817627,0.558106764952 | -0.897810008927,-0.841386961125 |
| TRIP4        | 252.242077731,242.833450991   | 7.97866514851,7.92382336036     |

|              |                               |                                 |
|--------------|-------------------------------|---------------------------------|
| MMAB         | 1.38657450602,1.38887545166   | 0.471525140054,0.473917230472   |
| LOC102180291 | 0.600350561646,0.668484792258 | -0.736122917737,-0.581033354888 |
| LOC102181993 | 1.75003138454,1.83008625295   | 0.807380795151,0.871911645105   |
| LOC102176495 | 0.569182895444,0.607132026081 | -0.813035786904,-0.719917817845 |
| NSDHL        | 1.49208048294,1.49049253305   | 0.577325356777,0.575789147849   |
| ARSB         | 0.694904707932,0.624877339294 | -0.525112939813,-0.678355072088 |
| NUAK2        | 337.839707915,310.863123163   | 8.40019509472,8.28013567366     |
| MYO18A       | 0.618736462211,0.5650789858   | -0.692603040246,-0.823475555753 |
| IFIT3        | 0.563017176253,0.627154520227 | -0.828749158875,-0.673107152497 |
| IFIT2        | 0.502259863654,0.562816758144 | -0.993494103216,-0.829262808724 |
| LOC102181148 | 15.5759461621,16.1731637825   | 3.96124789742,4.01553002026     |
| LOC108636851 | 0.62467287998,0.63692015515   | -0.678827197876,-0.650815568543 |
| KPNA3        | 13.557529254,12.4300551867    | 3.76102237824,3.63576079654     |
| B4GALT4      | 0.736430475991,0.732654473471 | -0.44137876335,-0.448795124274  |
| PRSS57       | 122.989498403,118.189775984   | 6.94239132446,6.88496143024     |
| RCN1         | 1.48679647101,1.43341157618   | 0.572207169003,0.519452910828   |
| NUDT2        | 12.330016712,14.4586140914    | 3.62410285005,3.85385736645     |
| NHSL2        | 0.563396152038,0.524092245907 | -0.827778384662,-0.932107330835 |
| HERC6        | 0.63771049156,0.60139248515   | -0.649026478396,-0.733621254419 |
| LOC102191038 | 153.468098435,142.131398922   | 7.26179498209,7.15108149217     |
| ITGAX        | 0.451394626547,0.461913790118 | -1.14753885026,-1.11430447739   |
| CD99         | 1.6050992784,1.65386820649    | 0.682662533501,0.725844273555   |
| MPO          | 0.41667224507,0.433037881143  | -1.26301509092,-1.20743486082   |
| DOPEY2       | 0.697700532644,0.709645013551 | -0.519320159851,-0.494830570639 |
| LOC102190927 | 0.455725657124,0.501618826587 | -1.13376249904,-0.995336598992  |
| TCIRG1       | 0.683849321688,0.636987083125 | -0.548249615976,-0.650663977195 |
| VAT1L        | 0.505671037007,0.568230515419 | -0.983728946367,-0.815451784899 |
| NCF2         | 0.471160789312,0.521702954027 | -1.08570861391,-0.938699492559  |
| BAG1         | 0.767983538406,0.698671021338 | -0.380852707528,-0.517314791799 |
| CD40LG       | 1.34213119479,1.3380106947    | 0.424525703447,0.420089647466   |
| AMPD3        | 0.584313373092,0.633396029426 | -0.775185786483,-0.658820271325 |
| NDUFAF7      | 1.38661399499,1.35569179208   | 0.471566226725,0.439029228195   |
| CCR3         | 0.559760102557,0.534361467174 | -0.837119433797,-0.90411211612  |
| SMPD3        | 0.555837379709,0.586232560539 | -0.847265236766,-0.770454994442 |
| IGF2R        | 0.631779713189,0.709815660131 | -0.662506482829,-0.494483691038 |
| LOC102174471 | 0.554564264126,0.555160287968 | -0.85057344214,-0.849023722938  |
| SORL1        | 0.645887601242,0.657048232718 | -0.630644969038,-0.605928814828 |
| MAPK3        | 0.734051240055,0.698386730551 | -0.446047321747,-0.517901947074 |
| PPP1R12A     | 0.669198332044,0.734836604951 | -0.579494245379,-0.444504600629 |
| TMEM30A      | 0.741101252649,0.752865410889 | -0.432257431283,-0.409536116309 |
| CST7         | 0.522895490213,0.49822559511  | -0.935405467379,-1.00512895651  |
| SRC          | 1.54160277267,1.37408552323   | 0.624431071527,0.458471800444   |
| RAP2A        | 0.567404163942,0.35961619801  | -0.8175513569,-1.47547008999    |
| ELL          | 0.685801080256,0.650065562713 | -0.544137918116,-0.621342865622 |
| ARL6IP6      | 0.698593255769,0.719124446104 | -0.517475379889,-0.475686640994 |
| LAMP2        | 0.57651883237,0.688644578107  | -0.794560357481,-0.538168520816 |
| SYNE1        | 0.607050093252,0.623621486422 | -0.720112523539,-0.681257458993 |
| NUDT18       | 0.708095120486,0.713356518672 | -0.497984920122,-0.487304813212 |
| TM6SF1       | 10.1741906244,10.8263798726   | 3.3468421249,3.43647900977      |
| LRRFIP1      | 0.683724780598,0.617793181418 | -0.548512380258,-0.694804146856 |
| AGPAT5       | 0.669812098594,0.719429213018 | -0.578171659685,-0.4750753524   |

|              |                               |                                 |
|--------------|-------------------------------|---------------------------------|
| TMSB15B      | 0.671485933086,0.726126885666 | -0.57457091784,-0.461706423628  |
| XYLB         | 0.73714333329,0.686654197363  | -0.439982924521,-0.54234436171  |
| STEAP4       | 0.475058888366,0.451005201499 | -1.07382173368,-1.14878402253   |
| GLCCI1       | 0.671881210603,0.640644600239 | -0.573721909536,-0.642403856088 |
| POLA2        | 0.607145712774,0.680115088643 | -0.719885295262,-0.556149195928 |
| SPCS1        | 19.7849562717,23.1431277436   | 4.30633197159,4.53251194962     |
| LOC102175938 | 0.615900642519,0.624329315843 | -0.699230461673,-0.679620884694 |
| HDHD2        | 0.768426129638,0.704273528972 | -0.380021517505,-0.505792236693 |
| DHFR         | 0.748780667563,0.749836046554 | -0.417384907791,-0.41535291352  |
| TMEM254      | 0.763772302061,0.754152393937 | -0.388785492816,-0.407072012027 |
| ADGRE1       | 0.385177411048,0.487865881676 | -1.37640499691,-1.03544350127   |
| CD244        | 0.455832766086,0.472099752069 | -1.13342346302,-1.0828363696    |
| SPNS3        | 0.447324783094,0.479203770877 | -1.16060540483,-1.06128883408   |
| RNASE2       | 0.254940563955,0.243935224263 | -1.97176715401,-2.03542999645   |
| BIN3         | 0.6134189462,0.628795370057   | -0.70505536818,-0.669337500097  |
| GRAMD2B      | 0.700085307099,0.731607212229 | -0.514397366215,-0.450858797554 |
| CEBPB        | 0.591047586986,0.641031028288 | -0.758653804172,-0.641533904543 |
| UBASH3B      | 0.708422599646,0.702739415486 | -0.497317858126,-0.508938275689 |
| SUN2         | 0.657036297652,0.684183183625 | -0.605955021149,-0.547545450002 |
| DVL3         | 2.24591993679,2.33716354357   | 1.16730649904,1.22475869058     |
| KDM4A        | 0.731385061583,0.725951458768 | -0.451296934711,-0.462055010214 |
| PHOSPHO1     | 0.653365247133,0.748105505035 | -0.614038375836,-0.418686347693 |
| LOC108636909 | 0.286784177357,0.348670280517 | -1.80196266596,-1.52006469601   |
| MEA1         | 0.702799037033,0.641107722194 | -0.508815880304,-0.641361308686 |
| DCP2         | 0.717712702748,0.634121660115 | -0.478521639791,-0.657168438109 |
| LOC102190765 | 0.544396646272,0.569066787392 | -0.877269915668,-0.813330113384 |
| MMP1         | 0.527535778294,0.533228426853 | -0.922659151936,-0.907174401132 |
| FXN          | 2.46628257883,2.72737021159   | 1.30233810863,1.4475105441      |
| PADI4        | 0.400181291461,0.415086773795 | -1.32127437229,-1.26851513183   |
| LOC102169702 | 0.436989235635,0.51127956997  | -1.19433035266,-0.967815715825  |
| LOC102181699 | 0.52987146839,0.490161056976  | -0.916285649183,-1.02867222745  |
| CASP7        | 0.597006728158,0.610746415893 | -0.744180904393,-0.711354602688 |
| AOAH         | 0.715512915754,0.635699279361 | -0.482950285551,-0.653583641918 |
| NRM          | 0.646710512331,0.725904224495 | -0.628808033188,-0.462148882701 |
| ACTN4        | 0.498232935913,0.450659334789 | -1.00510770015,-1.14989082044   |
| CPNE3        | 0.518869734221,0.540708356955 | -0.946555709257,-0.887077440623 |
| PTPRA        | 0.723091056081,0.597969730517 | -0.467750763223,-0.741855638454 |
| LOC102171106 | 0.214028212172,0.385322803844 | -2.22412711659,-1.37586052602   |
| SCIN         | 0.485615216152,0.525367851482 | -1.04211446752,-0.928600173682  |
| POU2F2       | 9.83955549741,9.9662468258    | 3.29859314319,3.3170503045      |
| FES          | 0.709120792192,0.683707635433 | -0.495896696685,-0.548548557906 |

**Table S2.** All Enriched Biological Process.

| GO_Name                         | GO_ID      | Pvalue   | Pvalue_adjus<br>ted | PAS_Value   | PAS_Zscore  |
|---------------------------------|------------|----------|---------------------|-------------|-------------|
| myeloid leukocyte<br>activation | GO:0002274 | 8.11E-14 | 2.27E-10            | -4.46,-4.23 | -1.33,-1.26 |
| cell activation                 | GO:0001775 | 1.26E-12 | 1.38E-09            | -5.59,-5.34 | -1.75,-1.68 |
| immune effector process         | GO:0002252 | 1.48E-12 | 1.38E-09            | -5.32,-5.0  | -1.65,-1.55 |
| regulated exocytosis            | GO:0045055 | 2.39E-12 | 1.52E-09            | -4.4,-4.23  | -1.31,-1.26 |

|                                                           |            |          |          |               |             |
|-----------------------------------------------------------|------------|----------|----------|---------------|-------------|
| leukocyte activation<br>involved in immune<br>response    | GO:0002366 | 3.94E-12 | 1.52E-09 | -4.01,-3.82   | -1.16,-1.1  |
| cell activation involved in<br>immune response            | GO:0002263 | 4.28E-12 | 1.52E-09 | -4.01,-3.82   | -1.16,-1.1  |
| immune system process                                     | GO:0002376 | 4.40E-12 | 1.52E-09 | -8.65,-8.08   | -2.9,-2.71  |
| secretion by cell                                         | GO:0032940 | 4.68E-12 | 1.52E-09 | -6.95,-6.82   | -2.26,-2.23 |
| neutrophil activation                                     | GO:0042119 | 4.89E-12 | 1.52E-09 | -3.76,-3.49   | -1.07,-0.98 |
| granulocyte activation                                    | GO:0036230 | 5.58E-12 | 1.56E-09 | -3.76,-3.49   | -1.07,-0.98 |
| leukocyte degranulation                                   | GO:0043299 | 1.57E-11 | 3.99E-09 | -3.54,-3.36   | -0.98,-0.93 |
| myeloid cell activation<br>involved in immune<br>response | GO:0002275 | 1.85E-11 | 4.32E-09 | -3.54,-3.36   | -0.98,-0.93 |
| secretion                                                 | GO:0046903 | 2.32E-11 | 4.69E-09 | -6.95,-6.82   | -2.26,-2.23 |
| myeloid leukocyte<br>mediated immunity                    | GO:0002444 | 2.34E-11 | 4.69E-09 | -3.54,-3.36   | -0.98,-0.93 |
| leukocyte activation                                      | GO:0045321 | 2.73E-11 | 5.11E-09 | -5.01,-4.69   | -1.53,-1.43 |
| neutrophil degranulation                                  | GO:0043312 | 5.67E-11 | 9.34E-09 | -3.39,-3.2    | -0.93,-0.87 |
| neutrophil activation<br>involved in immune<br>response   | GO:0002283 | 5.67E-11 | 9.34E-09 | -3.39,-3.2    | -0.93,-0.87 |
| immune response                                           | GO:0006955 | 6.11E-11 | 9.52E-09 | -7.27,-6.75   | -2.38,-2.21 |
| neutrophil mediated<br>immunity                           | GO:0002446 | 8.82E-11 | 1.30E-08 | -3.39,-3.2    | -0.93,-0.87 |
| exocytosis                                                | GO:0006887 | 1.97E-10 | 2.76E-08 | -4.66,-4.46   | -1.4,-1.35  |
| locomotion                                                | GO:0040011 | 3.12E-10 | 4.16E-08 | -7.7,-7.81    | -2.54,-2.61 |
| leukocyte mediated<br>immunity                            | GO:0002443 | 4.02E-09 | 5.12E-07 | -3.67,-3.49   | -1.03,-0.98 |
| regulation of localization                                | GO:0032879 | 5.95E-09 | 7.25E-07 | -7.55,-7.64   | -2.48,-2.54 |
| developmental process                                     | GO:0032502 | 2.04E-08 | 2.38E-06 | -12.56,-12.55 | -4.36,-4.39 |
| single-multicellular<br>organism process                  | GO:0044707 | 3.70E-08 | 4.15E-06 | -10.61,-10.44 | -3.63,-3.6  |
| single-organism<br>developmental process                  | GO:0044767 | 4.28E-08 | 4.44E-06 | -12.43,-12.41 | -4.31,-4.34 |
| vesicle-mediated<br>transport                             | GO:0016192 | 4.46E-08 | 4.44E-06 | -6.23,-5.91   | -1.99,-1.89 |
| regulation of cell motility                               | GO:2000145 | 4.53E-08 | 4.44E-06 | -3.0,-3.02    | -0.78,-0.8  |
| cell migration                                            | GO:0016477 | 4.60E-08 | 4.44E-06 | -4.39,-4.41   | -1.3,-1.32  |
| multicellular organismal<br>process                       | GO:0032501 | 6.16E-08 | 5.75E-06 | -10.88,-10.68 | -3.73,-3.69 |
| single-organism<br>localization                           | GO:1902578 | 6.48E-08 | 5.86E-06 | -11.93,-11.7  | -4.12,-4.07 |
| macromolecule<br>localization                             | GO:0033036 | 7.98E-08 | 6.99E-06 | -9.0,-8.99    | -3.03,-3.05 |
| regulation of cellular<br>localization                    | GO:0060341 | 1.05E-07 | 8.94E-06 | -5.28,-5.23   | -1.64,-1.64 |
| positive regulation of<br>cellular process                | GO:0048522 | 1.11E-07 | 9.11E-06 | -11.52,-11.52 | -3.97,-4.0  |
| regulation of locomotion                                  | GO:0040012 | 1.15E-07 | 9.17E-06 | -3.0,-3.02    | -0.78,-0.8  |
| regulation of cellular<br>component movement              | GO:0051270 | 1.39E-07 | 1.06E-05 | -3.0,-3.02    | -0.78,-0.8  |
| cell motility                                             | GO:0048870 | 1.44E-07 | 1.06E-05 | -4.39,-4.41   | -1.3,-1.32  |
| localization of cell                                      | GO:0051674 | 1.44E-07 | 1.06E-05 | -4.39,-4.41   | -1.3,-1.32  |

|                                                      |            |          |          |               |             |
|------------------------------------------------------|------------|----------|----------|---------------|-------------|
| response to stress                                   | GO:0006950 | 1.71E-07 | 1.21E-05 | -11.64,-11.68 | -4.01,-4.06 |
| regulation of cell migration                         | GO:0030334 | 1.73E-07 | 1.21E-05 | -2.85,-2.86   | -0.73,-0.74 |
| anatomical structure development                     | GO:0048856 | 2.01E-07 | 1.37E-05 | -11.28,-11.28 | -3.88,-3.91 |
| cell death                                           | GO:0008219 | 2.38E-07 | 1.59E-05 | -8.41,-8.2    | -2.8,-2.75  |
| localization                                         | GO:0051179 | 2.95E-07 | 1.92E-05 | -16.14,-15.87 | -5.7,-5.64  |
| response to chemical                                 | GO:0042221 | 4.14E-07 | 2.64E-05 | -12.36,-12.31 | -4.28,-4.3  |
| symbiosis, encompassing mutualism through parasitism | GO:0044403 | 4.35E-07 | 2.71E-05 | -4.12,-3.91   | -1.2,-1.14  |
| regulation of biological quality                     | GO:0065008 | 5.45E-07 | 3.32E-05 | -8.32,-8.11   | -2.77,-2.72 |
| single-organism transport                            | GO:0044765 | 7.55E-07 | 4.50E-05 | -11.29,-10.91 | -3.88,-3.77 |
| small molecule metabolic process                     | GO:0044281 | 7.85E-07 | 4.58E-05 | -5.28,-5.09   | -1.64,-1.58 |
| apoptotic process                                    | GO:0006915 | 8.44E-07 | 4.82E-05 | -8.08,-7.88   | -2.68,-2.63 |
| interspecies interaction between organisms           | GO:0044419 | 8.61E-07 | 4.83E-05 | -4.12,-3.91   | -1.2,-1.14  |
| regulation of cell death                             | GO:0010941 | 1.10E-06 | 6.06E-05 | -6.79,-6.57   | -2.2,-2.14  |
| response to wounding                                 | GO:0009611 | 1.25E-06 | 6.74E-05 | -3.06,-2.87   | -0.8,-0.74  |
| regulation of developmental process                  | GO:0050793 | 1.35E-06 | 7.12E-05 | -7.5,-7.47    | -2.47,-2.48 |
| regulation of multicellular organismal process       | GO:0051239 | 1.46E-06 | 7.55E-05 | -5.17,-5.17   | -1.59,-1.61 |
| multicellular organism development                   | GO:0007275 | 1.66E-06 | 8.37E-05 | -7.78,-7.79   | -2.57,-2.6  |
| single-organism process                              | GO:0044699 | 1.67E-06 | 8.37E-05 | -26.66,-26.28 | -9.63,-9.56 |
| programmed cell death                                | GO:0012501 | 1.76E-06 | 8.49E-05 | -8.08,-7.88   | -2.68,-2.63 |
| regulation of secretion                              | GO:0051046 | 2.14E-06 | 1.02E-04 | -3.79,-3.73   | -1.08,-1.07 |
| movement of cell or subcellular component            | GO:0006928 | 2.29E-06 | 1.07E-04 | -5.37,-5.51   | -1.67,-1.74 |
| regulation of protein oligomerization                | GO:0032459 | 2.64E-06 | 1.21E-04 | -0.89,-0.76   | 0.0,0.05    |
| positive regulation of transport                     | GO:0051050 | 3.03E-06 | 1.37E-04 | -3.4,-3.31    | -0.93,-0.91 |
| cellular response to chemical stimulus               | GO:0070887 | 3.31E-06 | 1.46E-04 | -9.62,-9.5    | -3.26,-3.24 |
| cellular localization                                | GO:0051641 | 3.33E-06 | 1.46E-04 | -8.82,-8.8    | -2.96,-2.98 |
| cell differentiation                                 | GO:0030154 | 3.89E-06 | 1.68E-04 | -8.96,-9.12   | -3.01,-3.1  |
| positive regulation of secretion                     | GO:0051047 | 4.75E-06 | 2.01E-04 | -1.97,-1.83   | -0.4,-0.35  |
| response to progesterone                             | GO:0032570 | 5.20E-06 | 2.17E-04 | -1.0,-0.8     | -0.03,0.03  |
| establishment of localization                        | GO:0051234 | 5.26E-06 | 2.17E-04 | -14.49,-14.25 | -5.08,-5.03 |
| positive regulation of cell migration                | GO:0030335 | 5.89E-06 | 2.39E-04 | -1.99,-1.79   | -0.4,-0.34  |
| single-organism metabolic process                    | GO:0044710 | 6.35E-06 | 2.54E-04 | -9.51,-9.43   | -3.22,-3.21 |
| positive regulation of biological process            | GO:0048518 | 6.48E-06 | 2.56E-04 | -11.64,-11.64 | -4.01,-4.05 |
| regulation of transport                              | GO:0051049 | 6.89E-06 | 2.68E-04 | -5.55,-5.49   | -1.73,-1.73 |

|                                                    |            |          |          |               |             |
|----------------------------------------------------|------------|----------|----------|---------------|-------------|
| defense response                                   | GO:0006952 | 7.12E-06 | 2.73E-04 | -4.73,-4.51   | -1.43,-1.36 |
| response to lipid                                  | GO:0033993 | 7.33E-06 | 2.77E-04 | -5.0,-4.66    | -1.53,-1.42 |
| negative regulation of cell death                  | GO:0060548 | 7.46E-06 | 2.77E-04 | -5.12,-5.05   | -1.58,-1.57 |
| regulation of secretion by cell                    | GO:1903530 | 7.50E-06 | 2.77E-04 | -3.48,-3.45   | -0.96,-0.96 |
| positive regulation of cell motility               | GO:2000147 | 7.87E-06 | 2.83E-04 | -1.99,-1.79   | -0.4,-0.34  |
| negative regulation of protein oligomerization     | GO:0032460 | 7.89E-06 | 2.83E-04 | -0.19,-0.14   | 0.27,0.28   |
| protein localization                               | GO:0008104 | 8.29E-06 | 2.94E-04 | -7.61,-7.63   | -2.5,-2.54  |
| multi-organism process                             | GO:0051704 | 8.42E-06 | 2.95E-04 | -6.12,-5.75   | -1.95,-1.83 |
| response to external stimulus                      | GO:0009605 | 8.61E-06 | 2.97E-04 | -8.03,-7.75   | -2.66,-2.58 |
| blood coagulation                                  | GO:0007596 | 8.69E-06 | 2.97E-04 | -2.11,-2.02   | -0.45,-0.42 |
| hemostasis                                         | GO:0007599 | 9.26E-06 | 3.02E-04 | -2.11,-2.02   | -0.45,-0.42 |
| positive regulation of cellular component movement | GO:0051272 | 9.33E-06 | 3.02E-04 | -1.99,-1.79   | -0.4,-0.34  |
| response to stimulus                               | GO:0050896 | 9.41E-06 | 3.02E-04 | -19.94,-19.76 | -7.12,-7.1  |
| transport                                          | GO:0006810 | 9.44E-06 | 3.02E-04 | -14.25,-13.8  | -4.99,-4.86 |
| regulation of apoptotic process                    | GO:0042981 | 9.44E-06 | 3.02E-04 | -6.46,-6.25   | -2.08,-2.02 |
| regulation of cytoplasmic transport                | GO:1903649 | 9.47E-06 | 3.02E-04 | -1.99,-1.86   | -0.4,-0.36  |
| single-organism biosynthetic process               | GO:0044711 | 9.74E-06 | 3.03E-04 | -4.11,-3.99   | -1.2,-1.17  |
| coagulation                                        | GO:0050817 | 9.75E-06 | 3.03E-04 | -2.11,-2.02   | -0.45,-0.42 |
| regulation of programmed cell death                | GO:0043067 | 1.01E-05 | 3.12E-04 | -6.46,-6.25   | -2.08,-2.02 |
| cellular response to oxidative stress              | GO:0034599 | 1.04E-05 | 3.17E-04 | -1.67,-1.73   | -0.29,-0.32 |
| positive regulation of locomotion                  | GO:0040017 | 1.08E-05 | 3.27E-04 | -1.99,-1.79   | -0.4,-0.34  |
| single-organism cellular process                   | GO:0044763 | 1.11E-05 | 3.32E-04 | -25.26,-24.9  | -9.11,-9.04 |
| regulation of multicellular organismal development | GO:2000026 | 1.22E-05 | 3.61E-04 | -3.82,-3.78   | -1.09,-1.09 |
| response to lipopolysaccharide                     | GO:0032496 | 1.32E-05 | 3.86E-04 | -1.84,-1.57   | -0.35,-0.25 |
| system development                                 | GO:0048731 | 1.33E-05 | 3.86E-04 | -6.89,-6.88   | -2.24,-2.26 |
| peptide transport                                  | GO:0015833 | 1.35E-05 | 3.87E-04 | -6.35,-6.22   | -2.03,-2.01 |
| phosphate-containing compound metabolic process    | GO:0006796 | 1.48E-05 | 4.16E-04 | -8.09,-8.18   | -2.69,-2.74 |
| wound healing                                      | GO:0042060 | 1.48E-05 | 4.16E-04 | -2.32,-2.22   | -0.53,-0.5  |
| positive regulation of protein transport           | GO:0051222 | 1.63E-05 | 4.48E-04 | -2.21,-2.14   | -0.49,-0.47 |
| cellular component organization or biogenesis      | GO:0071840 | 1.63E-05 | 4.48E-04 | -15.11,-15.2  | -5.31,-5.39 |
| organophosphate metabolic process                  | GO:0019637 | 1.65E-05 | 4.49E-04 | -3.27,-3.1    | -0.89,-0.83 |

|                                                              |            |          |          |              |             |
|--------------------------------------------------------------|------------|----------|----------|--------------|-------------|
| response to organic substance                                | GO:0010033 | 1.67E-05 | 4.49E-04 | -8.33,-7.94  | -2.77,-2.65 |
| regulation of intracellular transport                        | GO:0032386 | 1.68E-05 | 4.49E-04 | -2.14,-2.02  | -0.46,-0.43 |
| cytosolic transport                                          | GO:0016482 | 1.73E-05 | 4.58E-04 | -5.17,-5.01  | -1.59,-1.55 |
| amide transport                                              | GO:0042886 | 1.91E-05 | 5.00E-04 | -6.35,-6.22  | -2.03,-2.01 |
| response to molecule of bacterial origin                     | GO:0002237 | 1.94E-05 | 5.04E-04 | -1.84,-1.57  | -0.35,-0.25 |
| phosphorus metabolic process                                 | GO:0006793 | 1.96E-05 | 5.04E-04 | -8.09,-8.18  | -2.69,-2.74 |
| interaction with host                                        | GO:0051701 | 2.12E-05 | 5.39E-04 | -0.99,-0.9   | -0.03,-0.0  |
| positive regulation of multicellular organismal process      | GO:0051240 | 2.34E-05 | 5.91E-04 | -3.1,-2.95   | -0.82,-0.78 |
| regulation of protein transport                              | GO:0051223 | 2.64E-05 | 6.59E-04 | -3.64,-3.63  | -1.02,-1.03 |
| positive regulation of secretion by cell                     | GO:1903532 | 2.66E-05 | 6.59E-04 | -1.66,-1.55  | -0.28,-0.25 |
| negative regulation of biological process                    | GO:0048519 | 2.70E-05 | 6.65E-04 | -9.53,-9.46  | -3.22,-3.23 |
| positive regulation of establishment of protein localization | GO:1904951 | 2.82E-05 | 6.86E-04 | -2.21,-2.14  | -0.49,-0.47 |
| regulation of vesicle-mediated transport                     | GO:0060627 | 3.13E-05 | 7.57E-04 | -1.88,-1.85  | -0.37,-0.36 |
| organic substance transport                                  | GO:0071702 | 3.17E-05 | 7.58E-04 | -7.73,-7.53  | -2.55,-2.5  |
| negative regulation of cellular process                      | GO:0048523 | 3.30E-05 | 7.83E-04 | -9.03,-9.02  | -3.04,-3.06 |
| cellular developmental process                               | GO:0048869 | 3.49E-05 | 8.20E-04 | -8.96,-9.12  | -3.01,-3.1  |
| muscle cell migration                                        | GO:0014812 | 3.51E-05 | 8.20E-04 | -0.91,-0.83  | -0.0,0.02   |
| hematopoietic or lymphoid organ development                  | GO:0048534 | 3.62E-05 | 8.37E-04 | -1.93,-1.73  | -0.38,-0.32 |
| platelet activation                                          | GO:0030168 | 3.86E-05 | 8.86E-04 | -1.14,-1.08  | -0.09,-0.07 |
| cellular response to reactive oxygen species                 | GO:0034614 | 4.17E-05 | 9.50E-04 | -0.58,-0.57  | 0.12,0.12   |
| negative regulation of protein complex assembly              | GO:0031333 | 4.65E-05 | 1.04E-03 | -1.1,-0.9    | -0.07,-0.0  |
| regulation of protein localization                           | GO:0032880 | 4.67E-05 | 1.04E-03 | -3.99,-4.0   | -1.15,-1.17 |
| cellular catabolic process                                   | GO:0044248 | 4.69E-05 | 1.04E-03 | -4.34,-4.27  | -1.28,-1.27 |
| cellular component organization                              | GO:0016043 | 4.72E-05 | 1.04E-03 | -14.7,-14.85 | -5.16,-5.26 |
| catabolic process                                            | GO:0009056 | 4.83E-05 | 1.06E-03 | -4.81,-4.73  | -1.46,-1.44 |
| cellular response to lipopolysaccharide                      | GO:0071222 | 4.90E-05 | 1.06E-03 | -0.56,-0.43  | 0.13,0.17   |
| positive regulation of cytokine production                   | GO:0001819 | 5.02E-05 | 1.08E-03 | -1.4,-1.29   | -0.18,-0.15 |
| regulation of cell adhesion                                  | GO:0030155 | 5.07E-05 | 1.08E-03 | -2.03,-1.87  | -0.42,-0.37 |

|                                                           |            |          |          |               |             |
|-----------------------------------------------------------|------------|----------|----------|---------------|-------------|
| regulation of vacuolar transport                          | GO:1903335 | 5.15E-05 | 1.09E-03 | -0.19,-0.14   | 0.27,0.28   |
| regulation of establishment of protein localization       | GO:0070201 | 5.27E-05 | 1.11E-03 | -3.64,-3.63   | -1.02,-1.03 |
| response to oxygen-containing compound                    | GO:1901700 | 5.81E-05 | 1.21E-03 | -3.46,-3.24   | -0.95,-0.89 |
| cellular response to molecule of bacterial origin         | GO:0071219 | 6.16E-05 | 1.27E-03 | -0.56,-0.43   | 0.13,0.17   |
| anatomical structure homeostasis                          | GO:0060249 | 6.19E-05 | 1.27E-03 | -1.24,-1.09   | -0.12,-0.07 |
| regulation of body fluid levels                           | GO:0050878 | 6.21E-05 | 1.27E-03 | -2.11,-2.02   | -0.45,-0.42 |
| positive regulation of immune effector process            | GO:0002699 | 6.80E-05 | 1.38E-03 | -1.05,-1.04   | -0.05,-0.06 |
| peptide secretion                                         | GO:0002790 | 7.11E-05 | 1.43E-03 | -2.76,-2.73   | -0.69,-0.69 |
| regulation of protein binding                             | GO:0043393 | 7.14E-05 | 1.43E-03 | -0.96,-0.88   | -0.02,0.0   |
| immune system development                                 | GO:0002520 | 7.35E-05 | 1.46E-03 | -1.93,-1.73   | -0.38,-0.32 |
| regulation of cellular component organization             | GO:0051128 | 7.43E-05 | 1.47E-03 | -4.62,-4.8    | -1.39,-1.47 |
| vesicle-mediated transport between endosomal compartments | GO:0098927 | 7.90E-05 | 1.55E-03 | -0.19,-0.14   | 0.27,0.28   |
| response to organic cyclic compound                       | GO:0014070 | 8.02E-05 | 1.56E-03 | -4.4,-4.2     | -1.31,-1.25 |
| telomere maintenance via telomere lengthening             | GO:0010833 | 9.05E-05 | 1.74E-03 | -0.68,-0.66   | 0.08,0.09   |
| negative regulation of cellular component organization    | GO:0051129 | 9.08E-05 | 1.74E-03 | -2.15,-2.02   | -0.47,-0.43 |
| lipid metabolic process                                   | GO:0006629 | 9.84E-05 | 1.87E-03 | -2.74,-2.64   | -0.69,-0.66 |
| negative regulation of apoptotic process                  | GO:0043066 | 9.94E-05 | 1.87E-03 | -4.8,-4.73    | -1.45,-1.45 |
| single-organism intracellular transport                   | GO:1902582 | 9.96E-05 | 1.87E-03 | -5.68,-5.7    | -1.78,-1.81 |
| cellular response to biotic stimulus                      | GO:0071216 | 1.01E-04 | 1.89E-03 | -0.56,-0.43   | 0.13,0.17   |
| negative regulation of programmed cell death              | GO:0043069 | 1.07E-04 | 1.99E-03 | -4.8,-4.73    | -1.45,-1.45 |
| organelle organization                                    | GO:0006996 | 1.12E-04 | 2.07E-03 | -10.04,-10.13 | -3.41,-3.48 |
| response to bacterium                                     | GO:0009617 | 1.14E-04 | 2.08E-03 | -2.43,-2.18   | -0.57,-0.49 |
| animal organ development                                  | GO:0048513 | 1.15E-04 | 2.08E-03 | -5.26,-4.92   | -1.63,-1.52 |
| response to endogenous stimulus                           | GO:0009719 | 1.17E-04 | 2.12E-03 | -5.4,-5.22    | -1.68,-1.63 |
| establishment of protein localization to organelle        | GO:0072594 | 1.21E-04 | 2.18E-03 | -4.36,-4.22   | -1.29,-1.25 |
| regulation of protein secretion                           | GO:0050708 | 1.29E-04 | 2.30E-03 | -1.61,-1.63   | -0.26,-0.28 |
| intracellular transport                                   | GO:0046907 | 1.30E-04 | 2.31E-03 | -6.47,-6.37   | -2.08,-2.06 |
| leukocyte migration                                       | GO:0050900 | 1.34E-04 | 2.36E-03 | -1.87,-1.66   | -0.36,-0.29 |



|                                                                   |            |          |          |             |             |
|-------------------------------------------------------------------|------------|----------|----------|-------------|-------------|
| hemopoiesis                                                       | GO:0030097 | 1.36E-04 | 2.38E-03 | -1.8,-1.57  | -0.33,-0.26 |
| positive regulation of cytokine secretion                         | GO:0050715 | 1.55E-04 | 2.70E-03 | -0.88,-0.76 | 0.01,0.05   |
| multi-organism cellular process                                   | GO:0044764 | 1.64E-04 | 2.84E-03 | -3.04,-2.93 | -0.8,-0.77  |
| single-organism cellular localization                             | GO:1902580 | 1.66E-04 | 2.85E-03 | -5.27,-5.5  | -1.63,-1.74 |
| establishment of protein localization                             | GO:0045184 | 1.72E-04 | 2.94E-03 | -6.34,-6.43 | -2.03,-2.09 |
| vacuolar transport                                                | GO:0007034 | 1.77E-04 | 3.01E-03 | -0.91,-0.84 | -0.0,0.02   |
| response to hormone                                               | GO:0009725 | 1.79E-04 | 3.01E-03 | -4.45,-4.39 | -1.33,-1.32 |
| regulation of production of molecular mediator of immune response | GO:0002700 | 1.81E-04 | 3.03E-03 | -0.82,-0.75 | 0.03,0.05   |
| regulation of cellular component biogenesis                       | GO:0044087 | 1.89E-04 | 3.10E-03 | -2.21,-1.92 | -0.49,-0.39 |
| myeloid cell differentiation                                      | GO:0030099 | 1.89E-04 | 3.10E-03 | -1.24,-1.07 | -0.12,-0.07 |
| alcohol metabolic process                                         | GO:0006066 | 1.89E-04 | 3.10E-03 | -1.41,-1.33 | -0.19,-0.17 |
| establishment of localization in cell                             | GO:0051649 | 1.90E-04 | 3.10E-03 | -7.17,-7.01 | -2.34,-2.3  |
| neutral lipid catabolic process                                   | GO:0046461 | 1.91E-04 | 3.10E-03 | -0.54,-0.53 | 0.14,0.14   |
| acylglycerol catabolic process                                    | GO:0046464 | 1.91E-04 | 3.10E-03 | -0.54,-0.53 | 0.14,0.14   |
| response to other organism                                        | GO:0051707 | 1.94E-04 | 3.13E-03 | -2.98,-2.63 | -0.78,-0.66 |
| response to external biotic stimulus                              | GO:0043207 | 1.98E-04 | 3.18E-03 | -2.98,-2.63 | -0.78,-0.66 |
| response to insulin                                               | GO:0032868 | 2.00E-04 | 3.18E-03 | -1.16,-1.17 | -0.09,-0.1  |
| caveolin-mediated endocytosis                                     | GO:0072584 | 2.07E-04 | 3.26E-03 | -0.05,0.02  | 0.32,0.34   |
| protein catabolic process in the vacuole                          | GO:0007039 | 2.07E-04 | 3.26E-03 | -0.4,-0.36  | 0.19,0.2    |
| cell surface receptor signaling pathway                           | GO:0007166 | 2.21E-04 | 3.47E-03 | -6.02,-5.68 | -1.91,-1.8  |
| protein targeting                                                 | GO:0006605 | 2.26E-04 | 3.51E-03 | -4.36,-4.22 | -1.29,-1.25 |
| protein localization to organelle                                 | GO:0033365 | 2.28E-04 | 3.53E-03 | -4.55,-4.36 | -1.36,-1.31 |
| viral process                                                     | GO:0016032 | 2.35E-04 | 3.61E-03 | -3.04,-2.93 | -0.8,-0.77  |
| regulation of cell proliferation                                  | GO:0042127 | 2.38E-04 | 3.65E-03 | -3.31,-3.08 | -0.9,-0.82  |
| response to interleukin-1                                         | GO:0070555 | 2.48E-04 | 3.76E-03 | -0.2,-0.08  | 0.27,0.31   |
| positive regulation of protein secretion                          | GO:0050714 | 2.48E-04 | 3.76E-03 | -1.08,-1.01 | -0.07,-0.05 |
| response to oxidative stress                                      | GO:0006979 | 2.56E-04 | 3.86E-03 | -1.67,-1.73 | -0.29,-0.32 |
| protein transport                                                 | GO:0015031 | 2.68E-04 | 3.99E-03 | -6.09,-5.99 | -1.94,-1.92 |
| nitrogen compound transport                                       | GO:0071705 | 2.68E-04 | 3.99E-03 | -6.35,-6.22 | -2.03,-2.01 |
| response to reactive oxygen species                               | GO:0000302 | 2.91E-04 | 4.31E-03 | -0.58,-0.57 | 0.12,0.12   |
| response to biotic stimulus                                       | GO:0009607 | 2.94E-04 | 4.32E-03 | -2.98,-2.63 | -0.78,-0.66 |

|                                                             |            |          |          |               |             |
|-------------------------------------------------------------|------------|----------|----------|---------------|-------------|
| regulation of telomere maintenance via telomerase           | GO:0032210 | 2.95E-04 | 4.32E-03 | -0.19,-0.14   | 0.27,0.28   |
| cellular response to interferon-alpha                       | GO:0035457 | 3.03E-04 | 4.40E-03 | -0.55,-0.45   | 0.13,0.17   |
| sequestering of actin monomers                              | GO:0042989 | 3.03E-04 | 4.40E-03 | -0.49,-0.42   | 0.16,0.18   |
| cellular defense response                                   | GO:0006968 | 3.25E-04 | 4.70E-03 | -0.74,-0.75   | 0.06,0.05   |
| cellular protein localization                               | GO:0034613 | 3.31E-04 | 4.76E-03 | -6.09,-6.03   | -1.94,-1.94 |
| regulation of smooth muscle cell migration                  | GO:0014910 | 3.41E-04 | 4.88E-03 | -0.19,-0.14   | 0.27,0.28   |
| cellular macromolecule localization                         | GO:0070727 | 3.56E-04 | 5.04E-03 | -6.09,-6.03   | -1.94,-1.94 |
| negative regulation of protein homooligomerization          | GO:0032463 | 3.58E-04 | 5.04E-03 | 0.05,0.02     | 0.36,0.34   |
| regulation of metalloproteinase activity                    | GO:1905048 | 3.58E-04 | 5.04E-03 | -0.32,-0.34   | 0.22,0.21   |
| biological regulation                                       | GO:0065007 | 3.65E-04 | 5.11E-03 | -24.84,-24.43 | -8.95,-8.87 |
| protein complex subunit organization                        | GO:0071822 | 3.71E-04 | 5.17E-03 | -4.74,-4.71   | -1.43,-1.44 |
| regulation of cell differentiation                          | GO:0045595 | 3.75E-04 | 5.20E-03 | -5.06,-5.15   | -1.55,-1.6  |
| maintenance of protein location in cell                     | GO:0032507 | 4.03E-04 | 5.56E-03 | -0.89,-0.81   | 0.01,0.03   |
| regulation of telomere maintenance via telomere lengthening | GO:1904356 | 4.10E-04 | 5.64E-03 | -0.19,-0.14   | 0.27,0.28   |
| cellular lipid metabolic process                            | GO:0044255 | 4.16E-04 | 5.69E-03 | -2.23,-2.09   | -0.5,-0.45  |
| cellular response to oxygen-containing compound             | GO:1901701 | 4.19E-04 | 5.70E-03 | -2.34,-2.27   | -0.53,-0.52 |
| cell development                                            | GO:0048468 | 4.29E-04 | 5.80E-03 | -3.89,-4.11   | -1.11,-1.21 |
| regulation of protein complex assembly                      | GO:0043254 | 4.44E-04 | 5.99E-03 | -1.53,-1.34   | -0.23,-0.17 |
| glycerolipid catabolic process                              | GO:0046503 | 4.48E-04 | 6.01E-03 | -0.54,-0.53   | 0.14,0.14   |
| maintenance of protein location                             | GO:0045185 | 4.96E-04 | 6.62E-03 | -0.89,-0.81   | 0.01,0.03   |
| smooth muscle cell migration                                | GO:0014909 | 5.08E-04 | 6.75E-03 | -0.19,-0.14   | 0.27,0.28   |
| acylglycerol metabolic process                              | GO:0006639 | 5.54E-04 | 7.33E-03 | -0.71,-0.67   | 0.07,0.08   |
| regulation of cell activation                               | GO:0050865 | 5.60E-04 | 7.37E-03 | -1.39,-1.35   | -0.18,-0.17 |
| neutral lipid metabolic process                             | GO:0006638 | 5.67E-04 | 7.42E-03 | -0.71,-0.67   | 0.07,0.08   |
| telomere maintenance via telomerase                         | GO:0007004 | 5.74E-04 | 7.47E-03 | -0.19,-0.14   | 0.27,0.28   |
| nuclear import                                              | GO:0051170 | 5.76E-04 | 7.47E-03 | -2.08,-1.94   | -0.44,-0.39 |
| organic substance catabolic process                         | GO:1901575 | 5.85E-04 | 7.55E-03 | -3.69,-3.66   | -1.04,-1.04 |

|                                                                             |            |          |          |              |             |
|-----------------------------------------------------------------------------|------------|----------|----------|--------------|-------------|
| response to steroid hormone                                                 | GO:0048545 | 6.18E-04 | 7.94E-03 | -3.69,-3.51  | -1.04,-0.99 |
| regulation of early endosome to late endosome transport                     | GO:2000641 | 6.21E-04 | 7.94E-03 | -0.05,0.02   | 0.32,0.34   |
| maintenance of location in cell                                             | GO:0051651 | 6.30E-04 | 8.03E-03 | -0.89,-0.81  | 0.01,0.03   |
| regulation of cytokine production                                           | GO:0001817 | 6.63E-04 | 8.41E-03 | -1.4,-1.29   | -0.18,-0.15 |
| superoxide metabolic process                                                | GO:0006801 | 6.69E-04 | 8.45E-03 | -0.83,-0.77  | 0.03,0.05   |
| negative regulation of growth of symbiont in host                           | GO:0044130 | 6.97E-04 | 8.76E-03 | -0.59,-0.51  | 0.12,0.14   |
| cellular response to organic substance                                      | GO:0071310 | 7.18E-04 | 8.98E-03 | -7.01,-6.67  | -2.28,-2.18 |
| small molecule biosynthetic process                                         | GO:0044283 | 7.23E-04 | 9.01E-03 | -1.88,-1.78  | -0.36,-0.34 |
| protein secretion                                                           | GO:0009306 | 7.29E-04 | 9.04E-03 | -1.61,-1.63  | -0.26,-0.28 |
| negative regulation of growth of symbiont involved in interaction with host | GO:0044146 | 7.78E-04 | 9.48E-03 | -0.59,-0.51  | 0.12,0.14   |
| cytokine secretion involved in immune response                              | GO:0002374 | 7.78E-04 | 9.48E-03 | -0.35,-0.3   | 0.21,0.22   |
| regulation of growth of symbiont in host                                    | GO:0044126 | 7.78E-04 | 9.48E-03 | -0.59,-0.51  | 0.12,0.14   |
| entry of bacterium into host cell                                           | GO:0035635 | 7.78E-04 | 9.48E-03 | 0.56,0.43    | 0.55,0.5    |
| regulation of cytokine secretion                                            | GO:0050707 | 8.04E-04 | 9.75E-03 | -0.88,-0.76  | 0.01,0.05   |
| response to nutrient levels                                                 | GO:0031667 | 8.23E-04 | 9.94E-03 | -3.89,-3.77  | -1.12,-1.09 |
| regulation of telomere maintenance                                          | GO:0032204 | 8.31E-04 | 9.99E-03 | -0.19,-0.14  | 0.27,0.28   |
| telomere maintenance                                                        | GO:0000723 | 8.36E-04 | 1.00E-02 | -0.68,-0.66  | 0.08,0.09   |
| single-organism catabolic process                                           | GO:0044712 | 8.48E-04 | 1.00E-02 | -2.65,-2.61  | -0.65,-0.65 |
| cellular response to lipid                                                  | GO:0071396 | 8.49E-04 | 1.00E-02 | -2.96,-2.81  | -0.77,-0.72 |
| organonitrogen compound metabolic process                                   | GO:1901564 | 8.60E-04 | 1.00E-02 | -14.27,-14.2 | -5.0,-5.01  |
| protein targeting to lysosome                                               | GO:0006622 | 8.63E-04 | 1.00E-02 | -0.43,-0.34  | 0.18,0.21   |
| purine nucleoside catabolic process                                         | GO:0006152 | 8.63E-04 | 1.00E-02 | -0.38,-0.35  | 0.2,0.21    |
| purine ribonucleoside catabolic process                                     | GO:0046130 | 8.63E-04 | 1.00E-02 | -0.38,-0.35  | 0.2,0.21    |
| modulation of growth of symbiont involved in interaction with host          | GO:0044144 | 8.63E-04 | 1.00E-02 | -0.59,-0.51  | 0.12,0.14   |
| telomere organization                                                       | GO:0032200 | 8.86E-04 | 1.03E-02 | -0.68,-0.66  | 0.08,0.09   |

|                                                                                     |            |          |          |             |             |
|-------------------------------------------------------------------------------------|------------|----------|----------|-------------|-------------|
| positive regulation of<br>production of molecular<br>mediator of immune<br>response | GO:0002702 | 8.89E-04 | 1.03E-02 | -0.69,-0.63 | 0.08,0.1    |
| RNA-dependent DNA<br>biosynthetic process                                           | GO:0006278 | 9.20E-04 | 1.06E-02 | -0.19,-0.14 | 0.27,0.28   |
| negative regulation of<br>protein binding                                           | GO:0032091 | 9.51E-04 | 1.08E-02 | -0.62,-0.59 | 0.11,0.11   |
| negative regulation of<br>telomere maintenance via<br>telomerase                    | GO:0032211 | 9.53E-04 | 1.08E-02 | -0.04,0.06  | 0.32,0.36   |
| alcohol biosynthetic<br>process                                                     | GO:0046165 | 9.55E-04 | 1.08E-02 | -0.83,-0.77 | 0.03,0.05   |
| regulation of binding                                                               | GO:0051098 | 9.70E-04 | 1.10E-02 | -0.96,-0.88 | -0.02,0.0   |
| homeostatic process                                                                 | GO:0042592 | 9.76E-04 | 1.10E-02 | -2.93,-2.82 | -0.76,-0.73 |
| lysosomal transport                                                                 | GO:0007041 | 9.82E-04 | 1.10E-02 | -0.59,-0.55 | 0.12,0.13   |
| response to drug                                                                    | GO:0042493 | 9.90E-04 | 1.11E-02 | -1.5,-1.51  | -0.22,-0.23 |
| cellular component<br>biogenesis                                                    | GO:0044085 | 1.00E-03 | 1.11E-02 | -6.38,-6.45 | -2.05,-2.09 |
| response to extracellular<br>stimulus                                               | GO:0009991 | 1.03E-03 | 1.14E-02 | -3.89,-3.77 | -1.12,-1.09 |
| defense response to other<br>organism                                               | GO:0098542 | 1.03E-03 | 1.14E-02 | -2.1,-1.92  | -0.44,-0.39 |
| regulation of myeloid cell<br>differentiation                                       | GO:0045637 | 1.05E-03 | 1.14E-02 | -0.84,-0.79 | 0.02,0.04   |
| positive regulation of<br>interleukin-4 production                                  | GO:0032753 | 1.05E-03 | 1.14E-02 | 0.1,0.07    | 0.38,0.36   |
| response to interferon-<br>alpha                                                    | GO:0035455 | 1.05E-03 | 1.14E-02 | -0.55,-0.45 | 0.13,0.17   |
| cellular response to<br>organonitrogen<br>compound                                  | GO:0071417 | 1.09E-03 | 1.18E-02 | -1.29,-1.26 | -0.14,-0.14 |
| actin cytoskeleton<br>organization                                                  | GO:0030036 | 1.11E-03 | 1.20E-02 | -4.32,-4.45 | -1.28,-1.34 |
| positive regulation of<br>developmental process                                     | GO:0051094 | 1.11E-03 | 1.20E-02 | -2.33,-2.13 | -0.53,-0.47 |
| response to cytokine                                                                | GO:0034097 | 1.12E-03 | 1.20E-02 | -1.82,-1.65 | -0.34,-0.29 |
| cell adhesion                                                                       | GO:0007155 | 1.13E-03 | 1.21E-02 | -3.25,-3.01 | -0.88,-0.8  |
| growth of symbiont in<br>host                                                       | GO:0044117 | 1.14E-03 | 1.22E-02 | -0.59,-0.51 | 0.12,0.14   |
| organophosphate<br>biosynthetic process                                             | GO:0090407 | 1.15E-03 | 1.22E-02 | -1.77,-1.69 | -0.32,-0.3  |
| ethanolamine-containing<br>compound metabolic<br>process                            | GO:0042439 | 1.15E-03 | 1.22E-02 | -0.57,-0.5  | 0.13,0.15   |
| biological adhesion                                                                 | GO:0022610 | 1.16E-03 | 1.22E-02 | -3.25,-3.01 | -0.88,-0.8  |
| cytokine production                                                                 | GO:0001816 | 1.19E-03 | 1.25E-02 | -1.4,-1.29  | -0.18,-0.15 |
| response to ketone                                                                  | GO:1901654 | 1.21E-03 | 1.26E-02 | -1.0,-0.8   | -0.03,0.03  |
| positive regulation of<br>apoptotic process                                         | GO:0043065 | 1.23E-03 | 1.27E-02 | -1.68,-1.44 | -0.29,-0.21 |
| taxis                                                                               | GO:0042330 | 1.23E-03 | 1.27E-02 | -2.67,-2.74 | -0.66,-0.7  |
| chemotaxis                                                                          | GO:0006935 | 1.23E-03 | 1.27E-02 | -2.67,-2.74 | -0.66,-0.7  |

|                                                                      |            |          |          |              |             |
|----------------------------------------------------------------------|------------|----------|----------|--------------|-------------|
| positive regulation of protein autophosphorylation                   | GO:0031954 | 1.25E-03 | 1.27E-02 | 0.06,0.31    | 0.36,0.45   |
| regulation of protein homooligomerization                            | GO:0032462 | 1.25E-03 | 1.27E-02 | 0.05,0.02    | 0.36,0.34   |
| growth of symbiont involved in interaction with host                 | GO:0044116 | 1.25E-03 | 1.27E-02 | -0.59,-0.51  | 0.12,0.14   |
| growth involved in symbiotic interaction                             | GO:0044110 | 1.25E-03 | 1.27E-02 | -0.59,-0.51  | 0.12,0.14   |
| organic hydroxy compound metabolic process                           | GO:1901615 | 1.25E-03 | 1.27E-02 | -1.41,-1.33  | -0.19,-0.17 |
| glycerolipid metabolic process                                       | GO:0046486 | 1.28E-03 | 1.29E-02 | -1.36,-1.23  | -0.17,-0.13 |
| positive regulation of programmed cell death                         | GO:0043068 | 1.28E-03 | 1.29E-02 | -1.68,-1.44  | -0.29,-0.21 |
| cytokine secretion                                                   | GO:0050663 | 1.31E-03 | 1.32E-02 | -0.88,-0.76  | 0.01,0.05   |
| lamellipodium organization                                           | GO:0097581 | 1.34E-03 | 1.33E-02 | 0.21,0.2     | 0.42,0.41   |
| response to organonitrogen compound                                  | GO:0010243 | 1.34E-03 | 1.33E-02 | -1.74,-1.7   | -0.31,-0.3  |
| lipid transport                                                      | GO:0006869 | 1.39E-03 | 1.38E-02 | -1.44,-1.35  | -0.2,-0.17  |
| regulation of homotypic cell-cell adhesion                           | GO:0034110 | 1.42E-03 | 1.40E-02 | -0.32,-0.26  | 0.22,0.24   |
| phospholipid metabolic process                                       | GO:0006644 | 1.47E-03 | 1.45E-02 | -1.4,-1.21   | -0.18,-0.12 |
| myeloid leukocyte differentiation                                    | GO:0002573 | 1.48E-03 | 1.45E-02 | -0.78,-0.63  | 0.05,0.1    |
| response to acid chemical                                            | GO:0001101 | 1.50E-03 | 1.47E-02 | -0.95,-0.75  | -0.02,0.05  |
| regulation of immune effector process                                | GO:0002697 | 1.58E-03 | 1.54E-02 | -1.17,-1.17  | -0.1,-0.1   |
| osteoclast differentiation                                           | GO:0030316 | 1.62E-03 | 1.58E-02 | -0.19,-0.14  | 0.27,0.28   |
| response to inorganic substance                                      | GO:0010035 | 1.65E-03 | 1.60E-02 | -1.51,-1.49  | -0.22,-0.22 |
| protein complex assembly                                             | GO:0006461 | 1.67E-03 | 1.62E-02 | -3.76,-3.64  | -1.07,-1.04 |
| protein complex biogenesis                                           | GO:0070271 | 1.68E-03 | 1.62E-02 | -3.76,-3.64  | -1.07,-1.04 |
| nucleocytoplasmic transport                                          | GO:0006913 | 1.69E-03 | 1.62E-02 | -2.25,-2.07  | -0.5,-0.44  |
| cell communication                                                   | GO:0007154 | 1.70E-03 | 1.62E-02 | -16.03,-15.7 | -5.66,-5.58 |
| negative regulation of telomere maintenance via telomere lengthening | GO:1904357 | 1.70E-03 | 1.62E-02 | -0.04,0.06   | 0.32,0.36   |
| insulin receptor signaling pathway                                   | GO:0008286 | 1.76E-03 | 1.67E-02 | -0.63,-0.71  | 0.1,0.07    |
| positive regulation of cell death                                    | GO:0010942 | 1.77E-03 | 1.68E-02 | -1.68,-1.44  | -0.29,-0.21 |
| cellular component assembly                                          | GO:0022607 | 1.81E-03 | 1.70E-02 | -5.97,-6.1   | -1.89,-1.96 |
| regeneration                                                         | GO:0031099 | 1.84E-03 | 1.73E-02 | -0.77,-0.67  | 0.05,0.08   |

|                                                                                                                      |            |          |          |               |             |
|----------------------------------------------------------------------------------------------------------------------|------------|----------|----------|---------------|-------------|
| positive regulation of cellular biosynthetic process                                                                 | GO:0031328 | 1.85E-03 | 1.73E-02 | -5.59,-5.48   | -1.75,-1.73 |
| cellular response to interleukin-1                                                                                   | GO:0071347 | 1.85E-03 | 1.73E-02 | -0.37,-0.29   | 0.2,0.23    |
| endocytosis                                                                                                          | GO:0006897 | 1.86E-03 | 1.73E-02 | -2.13,-1.94   | -0.46,-0.39 |
| regulation of immune system process                                                                                  | GO:0002682 | 1.87E-03 | 1.73E-02 | -2.63,-2.44   | -0.64,-0.58 |
| positive regulation of cellular protein localization                                                                 | GO:1903829 | 1.88E-03 | 1.73E-02 | -1.53,-1.41   | -0.23,-0.2  |
| single organism signaling                                                                                            | GO:0044700 | 1.88E-03 | 1.73E-02 | -15.79,-15.54 | -5.57,-5.52 |
| actin filament-based process                                                                                         | GO:0030029 | 1.94E-03 | 1.73E-02 | -4.32,-4.45   | -1.28,-1.34 |
| protein localization to lysosome                                                                                     | GO:0061462 | 1.95E-03 | 1.73E-02 | -0.43,-0.34   | 0.18,0.21   |
| positive regulation of interleukin-10 production                                                                     | GO:0032733 | 1.95E-03 | 1.73E-02 | 0.08,0.02     | 0.37,0.34   |
| establishment of epithelial cell polarity                                                                            | GO:0090162 | 1.95E-03 | 1.73E-02 | -0.45,-0.69   | 0.17,0.07   |
| signaling                                                                                                            | GO:0023052 | 1.99E-03 | 1.73E-02 | -15.79,-15.54 | -5.57,-5.52 |
| regulation of DNA biosynthetic process                                                                               | GO:2000278 | 2.00E-03 | 1.73E-02 | -0.19,-0.14   | 0.27,0.28   |
| response to peptide hormone                                                                                          | GO:0043434 | 2.05E-03 | 1.73E-02 | -1.16,-1.17   | -0.09,-0.1  |
| protein import                                                                                                       | GO:0017038 | 2.06E-03 | 1.73E-02 | -1.93,-1.72   | -0.38,-0.31 |
| transmembrane receptor protein tyrosine kinase signaling pathway                                                     | GO:0007169 | 2.07E-03 | 1.73E-02 | -1.74,-1.73   | -0.31,-0.32 |
| ribonucleoside catabolic process                                                                                     | GO:0042454 | 2.08E-03 | 1.73E-02 | -0.38,-0.35   | 0.2,0.21    |
| positive regulation of biosynthetic process                                                                          | GO:0009891 | 2.09E-03 | 1.73E-02 | -5.59,-5.48   | -1.75,-1.73 |
| cellular response to endogenous stimulus                                                                             | GO:0071495 | 2.12E-03 | 1.73E-02 | -4.67,-4.46   | -1.41,-1.34 |
| generation of neurons                                                                                                | GO:0048699 | 2.12E-03 | 1.73E-02 | -2.75,-3.0    | -0.69,-0.79 |
| cell proliferation                                                                                                   | GO:0008283 | 2.15E-03 | 1.73E-02 | -3.31,-3.08   | -0.9,-0.82  |
| lipid localization                                                                                                   | GO:0010876 | 2.16E-03 | 1.73E-02 | -1.44,-1.35   | -0.2,-0.17  |
| xylulose catabolic process                                                                                           | GO:0005998 | 2.17E-03 | 1.73E-02 | 0.0,0.0       | 0.34,0.34   |
| negative regulation of apolipoprotein binding                                                                        | GO:2000657 | 2.17E-03 | 1.73E-02 | 0.0,0.0       | 0.34,0.34   |
| colon epithelial cell migration                                                                                      | GO:0061580 | 2.17E-03 | 1.73E-02 | 0.0,0.0       | 0.34,0.34   |
| induction by symbiont of defense-related host nitric oxide production                                                | GO:0052063 | 2.17E-03 | 1.73E-02 | 0.0,0.0       | 0.34,0.34   |
| response to gold nanoparticle                                                                                        | GO:1990268 | 2.17E-03 | 1.73E-02 | 0.0,0.0       | 0.34,0.34   |
| induction by organism of defense-related nitric oxide production in other organism involved in symbiotic interaction | GO:0052263 | 2.17E-03 | 1.73E-02 | 0.0,0.0       | 0.34,0.34   |

|                                                                                                                     |            |          |          |         |           |
|---------------------------------------------------------------------------------------------------------------------|------------|----------|----------|---------|-----------|
| regulation of apolipoprotein binding                                                                                | GO:2000656 | 2.17E-03 | 1.73E-02 | 0.0,0.0 | 0.34,0.34 |
| positive regulation of choline O-acetyltransferase activity                                                         | GO:1902771 | 2.17E-03 | 1.73E-02 | 0.0,0.0 | 0.34,0.34 |
| regulation of choline O-acetyltransferase activity                                                                  | GO:1902769 | 2.17E-03 | 1.73E-02 | 0.0,0.0 | 0.34,0.34 |
| deoxyribonucleoside diphosphate catabolic process                                                                   | GO:0009192 | 2.17E-03 | 1.73E-02 | 0.0,0.0 | 0.34,0.34 |
| positive regulation of myosin-light-chain-phosphatase activity                                                      | GO:0035508 | 2.17E-03 | 1.73E-02 | 0.0,0.0 | 0.34,0.34 |
| positive regulation by organism of immune response of other organism involved in symbiotic interaction              | GO:0052555 | 2.17E-03 | 1.73E-02 | 0.0,0.0 | 0.34,0.34 |
| negative regulation of tau-protein kinase activity                                                                  | GO:1902948 | 2.17E-03 | 1.73E-02 | 0.0,0.0 | 0.34,0.34 |
| positive regulation of progesterone secretion                                                                       | GO:2000872 | 2.17E-03 | 1.73E-02 | 0.0,0.0 | 0.34,0.34 |
| dGDP catabolic process                                                                                              | GO:0046067 | 2.17E-03 | 1.73E-02 | 0.0,0.0 | 0.34,0.34 |
| modulation by symbiont of defense-related host nitric oxide production                                              | GO:0052163 | 2.17E-03 | 1.73E-02 | 0.0,0.0 | 0.34,0.34 |
| induction by symbiont of host immune response                                                                       | GO:0052559 | 2.17E-03 | 1.73E-02 | 0.0,0.0 | 0.34,0.34 |
| induction by organism of immune response of other organism involved in symbiotic interaction                        | GO:0052558 | 2.17E-03 | 1.73E-02 | 0.0,0.0 | 0.34,0.34 |
| regulation of ferrochelatase activity                                                                               | GO:0010722 | 2.17E-03 | 1.73E-02 | 0.0,0.0 | 0.34,0.34 |
| negative regulation of neurofibrillary tangle assembly                                                              | GO:1902997 | 2.17E-03 | 1.73E-02 | 0.0,0.0 | 0.34,0.34 |
| positive regulation by symbiont of defense-related host nitric oxide production                                     | GO:0052347 | 2.17E-03 | 1.73E-02 | 0.0,0.0 | 0.34,0.34 |
| negative regulation of aspartic-type endopeptidase activity involved in amyloid precursor protein catabolic process | GO:1902960 | 2.17E-03 | 1.73E-02 | 0.0,0.0 | 0.34,0.34 |
| negative regulation of aspartic-type peptidase activity                                                             | GO:1905246 | 2.17E-03 | 1.73E-02 | 0.0,0.0 | 0.34,0.34 |
| positive regulation of early endosome to recycling endosome transport                                               | GO:1902955 | 2.17E-03 | 1.73E-02 | 0.0,0.0 | 0.34,0.34 |

|                                                                                                                                |            |          |          |             |             |
|--------------------------------------------------------------------------------------------------------------------------------|------------|----------|----------|-------------|-------------|
| modulation by organism of defense-related nitric oxide production in other organism involved in symbiotic interaction          | GO:0052302 | 2.17E-03 | 1.73E-02 | 0.0,0.0     | 0.34,0.34   |
| GDP catabolic process                                                                                                          | GO:0046712 | 2.17E-03 | 1.73E-02 | 0.0,0.0     | 0.34,0.34   |
| positive regulation of opsonization                                                                                            | GO:1903028 | 2.17E-03 | 1.73E-02 | 0.0,0.0     | 0.34,0.34   |
| purine deoxyribonucleoside diphosphate catabolic process                                                                       | GO:0009184 | 2.17E-03 | 1.73E-02 | 0.0,0.0     | 0.34,0.34   |
| dADP catabolic process                                                                                                         | GO:0046057 | 2.17E-03 | 1.73E-02 | 0.0,0.0     | 0.34,0.34   |
| positive regulation by organism of defense-related nitric oxide production in other organism involved in symbiotic interaction | GO:0052345 | 2.17E-03 | 1.73E-02 | 0.0,0.0     | 0.34,0.34   |
| arginine deiminase pathway                                                                                                     | GO:0019546 | 2.17E-03 | 1.73E-02 | 0.0,0.0     | 0.34,0.34   |
| positive regulation by symbiont of host immune response                                                                        | GO:0052556 | 2.17E-03 | 1.73E-02 | 0.0,0.0     | 0.34,0.34   |
| chloramphenicol transport                                                                                                      | GO:0042892 | 2.17E-03 | 1.73E-02 | 0.0,0.0     | 0.34,0.34   |
| regulation of interleukin-4 production                                                                                         | GO:0032673 | 2.22E-03 | 1.76E-02 | 0.1,0.07    | 0.38,0.36   |
| cellular lipid catabolic process                                                                                               | GO:0044242 | 2.23E-03 | 1.76E-02 | -0.79,-0.76 | 0.04,0.05   |
| cellular response to cytokine stimulus                                                                                         | GO:0071345 | 2.23E-03 | 1.76E-02 | -2.79,-2.58 | -0.71,-0.64 |
| maintenance of location                                                                                                        | GO:0051235 | 2.24E-03 | 1.76E-02 | -1.04,-0.96 | -0.05,-0.03 |
| regulation of leukocyte activation                                                                                             | GO:0002694 | 2.25E-03 | 1.76E-02 | -1.24,-1.2  | -0.13,-0.12 |
| nuclear transport                                                                                                              | GO:0051169 | 2.40E-03 | 1.88E-02 | -2.25,-2.07 | -0.5,-0.44  |
| response to transition metal nanoparticle                                                                                      | GO:1990267 | 2.43E-03 | 1.89E-02 | -0.39,-0.44 | 0.19,0.17   |
| cellular response to nitrogen compound                                                                                         | GO:1901699 | 2.43E-03 | 1.89E-02 | -1.29,-1.26 | -0.14,-0.14 |
| positive regulation of cellular component organization                                                                         | GO:0051130 | 2.46E-03 | 1.91E-02 | -2.67,-2.76 | -0.66,-0.7  |
| autophagy                                                                                                                      | GO:0006914 | 2.49E-03 | 1.92E-02 | -1.19,-1.11 | -0.11,-0.08 |
| innate immune response                                                                                                         | GO:0045087 | 2.49E-03 | 1.92E-02 | -2.46,-2.26 | -0.58,-0.51 |
| regulation of symbiosis, encompassing mutualism through parasitism                                                             | GO:0043903 | 2.50E-03 | 1.92E-02 | -1.13,-0.99 | -0.08,-0.04 |
| negative regulation of cell adhesion                                                                                           | GO:0007162 | 2.57E-03 | 1.97E-02 | -0.87,-0.83 | 0.01,0.02   |
| protein localization to nucleus                                                                                                | GO:0034504 | 2.59E-03 | 1.98E-02 | -1.32,-1.23 | -0.15,-0.13 |
| regulation of cell development                                                                                                 | GO:0060284 | 2.61E-03 | 1.99E-02 | -1.57,-1.76 | -0.25,-0.33 |



|                                                                 |            |          |          |               |              |
|-----------------------------------------------------------------|------------|----------|----------|---------------|--------------|
| regulation of MAP kinase activity                               | GO:0043405 | 2.61E-03 | 1.99E-02 | 0.32,0.34     | 0.46,0.46    |
| positive regulation of cytoplasmic transport                    | GO:1903651 | 2.64E-03 | 2.00E-02 | -1.34,-1.27   | -0.16,-0.14  |
| cytokine-mediated signaling pathway                             | GO:0019221 | 2.64E-03 | 2.00E-02 | -1.63,-1.51   | -0.27,-0.23  |
| cellular process                                                | GO:0009987 | 2.67E-03 | 2.02E-02 | -29.27,-29.04 | -10.61,-10.6 |
| cellular metabolic process                                      | GO:0044237 | 2.69E-03 | 2.03E-02 | -22.4,-22.47  | -8.03,-8.13  |
| regulation of cellular protein localization                     | GO:1903827 | 2.74E-03 | 2.05E-02 | -1.88,-1.78   | -0.36,-0.34  |
| positive regulation of nucleic acid-templated transcription     | GO:1903508 | 2.74E-03 | 2.05E-02 | -3.91,-3.9    | -1.12,-1.13  |
| positive regulation of transcription, DNA-templated             | GO:0045893 | 2.74E-03 | 2.05E-02 | -3.91,-3.9    | -1.12,-1.13  |
| cytoskeleton organization                                       | GO:0007010 | 2.78E-03 | 2.06E-02 | -5.69,-5.83   | -1.79,-1.86  |
| response to nitrogen compound                                   | GO:1901698 | 2.78E-03 | 2.06E-02 | -1.74,-1.7    | -0.31,-0.3   |
| positive regulation of interleukin-12 production                | GO:0032735 | 2.80E-03 | 2.06E-02 | 0.08,0.02     | 0.37,0.34    |
| purine ribonucleotide catabolic process                         | GO:0009154 | 2.80E-03 | 2.06E-02 | -0.38,-0.35   | 0.2,0.21     |
| respiratory burst                                               | GO:0045730 | 2.80E-03 | 2.06E-02 | -0.71,-0.65   | 0.07,0.09    |
| negative regulation of telomere maintenance                     | GO:0032205 | 2.80E-03 | 2.06E-02 | -0.04,0.06    | 0.32,0.36    |
| positive regulation of leukocyte migration                      | GO:0002687 | 2.90E-03 | 2.12E-02 | -0.37,-0.29   | 0.2,0.23     |
| regulation of endocytosis                                       | GO:0030100 | 2.90E-03 | 2.12E-02 | -0.91,-0.88   | -0.0,0.01    |
| regulation of stress-activated MAPK cascade                     | GO:0032872 | 2.94E-03 | 2.14E-02 | -0.1,0.1      | 0.3,0.38     |
| interleukin-4 production                                        | GO:0032633 | 2.95E-03 | 2.14E-02 | 0.1,0.07      | 0.38,0.36    |
| ribonucleotide catabolic process                                | GO:0009261 | 2.95E-03 | 2.14E-02 | -0.38,-0.35   | 0.2,0.21     |
| regulation of stress-activated protein kinase signaling cascade | GO:0070302 | 2.98E-03 | 2.16E-02 | -0.1,0.1      | 0.3,0.38     |
| macromolecular complex subunit organization                     | GO:0043933 | 3.05E-03 | 2.20E-02 | -5.26,-5.22   | -1.63,-1.63  |
| positive regulation of RNA biosynthetic process                 | GO:1902680 | 3.07E-03 | 2.21E-02 | -3.91,-3.9    | -1.12,-1.13  |
| cellular protein metabolic process                              | GO:0044267 | 3.07E-03 | 2.21E-02 | -11.33,-11.47 | -3.9,-3.99   |
| positive regulation of intracellular protein transport          | GO:0090316 | 3.10E-03 | 2.21E-02 | -1.34,-1.27   | -0.16,-0.14  |
| response to mechanical stimulus                                 | GO:0009612 | 3.10E-03 | 2.21E-02 | -1.02,-0.97   | -0.04,-0.03  |
| phosphatidylcholine biosynthetic process                        | GO:0006656 | 3.11E-03 | 2.21E-02 | -0.31,-0.27   | 0.22,0.23    |
| removal of superoxide radicals                                  | GO:0019430 | 3.11E-03 | 2.21E-02 | -0.51,-0.49   | 0.15,0.15    |
| regulation of bone resorption                                   | GO:0045124 | 3.11E-03 | 2.21E-02 | -0.04,0.02    | 0.32,0.34    |

|                                                                        |            |          |          |               |             |
|------------------------------------------------------------------------|------------|----------|----------|---------------|-------------|
| ERBB2 signaling pathway                                                | GO:0038128 | 3.28E-03 | 2.31E-02 | 0.1,0.13      | 0.38,0.38   |
| positive regulation of smooth muscle cell migration                    | GO:0014911 | 3.28E-03 | 2.31E-02 | 0.13,0.17     | 0.39,0.4    |
| early endosome to late endosome transport                              | GO:0045022 | 3.28E-03 | 2.31E-02 | -0.05,0.02    | 0.32,0.34   |
| phagocytosis                                                           | GO:0006909 | 3.32E-03 | 2.33E-02 | -1.07,-0.97   | -0.06,-0.03 |
| regulation of cellular process                                         | GO:0050794 | 3.36E-03 | 2.34E-02 | -23.02,-22.81 | -8.27,-8.25 |
| phospholipid transport                                                 | GO:0015914 | 3.36E-03 | 2.34E-02 | -0.58,-0.54   | 0.12,0.13   |
| Golgi organization                                                     | GO:0007030 | 3.36E-03 | 2.34E-02 | -0.61,-0.66   | 0.11,0.09   |
| regulation of cell-cell adhesion                                       | GO:0022407 | 3.41E-03 | 2.37E-02 | -0.32,-0.26   | 0.22,0.24   |
| neurogenesis                                                           | GO:0022008 | 3.42E-03 | 2.37E-02 | -2.75,-3.0    | -0.69,-0.79 |
| negative regulation of DNA biosynthetic process                        | GO:2000279 | 3.45E-03 | 2.37E-02 | -0.04,0.06    | 0.32,0.36   |
| regulation of protein autophosphorylation                              | GO:0031952 | 3.45E-03 | 2.37E-02 | 0.06,0.31     | 0.36,0.45   |
| response to fluid shear stress                                         | GO:0034405 | 3.45E-03 | 2.37E-02 | 0.14,0.14     | 0.39,0.39   |
| production of molecular mediator of immune response                    | GO:0002440 | 3.52E-03 | 2.42E-02 | -0.82,-0.75   | 0.03,0.05   |
| response to peptide                                                    | GO:1901652 | 3.53E-03 | 2.42E-02 | -1.16,-1.17   | -0.09,-0.1  |
| positive regulation of immune system process                           | GO:0002684 | 3.58E-03 | 2.44E-02 | -2.05,-1.87   | -0.43,-0.37 |
| cellular response to superoxide                                        | GO:0071451 | 3.62E-03 | 2.45E-02 | -0.51,-0.49   | 0.15,0.15   |
| cellular response to oxygen radical                                    | GO:0071450 | 3.62E-03 | 2.45E-02 | -0.51,-0.49   | 0.15,0.15   |
| positive regulation of cytokine production involved in immune response | GO:0002720 | 3.62E-03 | 2.45E-02 | -0.35,-0.3    | 0.21,0.22   |
| single-organism nuclear import                                         | GO:1902593 | 3.70E-03 | 2.49E-02 | -1.7,-1.56    | -0.29,-0.25 |
| entry into host                                                        | GO:0044409 | 3.72E-03 | 2.49E-02 | 1.69,1.52     | 0.97,0.91   |
| entry into host cell                                                   | GO:0030260 | 3.72E-03 | 2.49E-02 | 1.69,1.52     | 0.97,0.91   |
| entry into cell of other organism involved in symbiotic interaction    | GO:0051806 | 3.72E-03 | 2.49E-02 | 1.69,1.52     | 0.97,0.91   |
| entry into other organism involved in symbiotic interaction            | GO:0051828 | 3.72E-03 | 2.49E-02 | 1.69,1.52     | 0.97,0.91   |
| positive regulation of RNA metabolic process                           | GO:0051254 | 3.78E-03 | 2.52E-02 | -3.91,-3.9    | -1.12,-1.13 |
| reactive oxygen species metabolic process                              | GO:0072593 | 3.79E-03 | 2.52E-02 | -1.04,-0.92   | -0.05,-0.01 |
| toxin transport                                                        | GO:1901998 | 3.79E-03 | 2.52E-02 | -2.19,-2.24   | -0.48,-0.51 |
| positive regulation of gene expression                                 | GO:0010628 | 3.86E-03 | 2.56E-02 | -5.13,-5.06   | -1.58,-1.57 |

|                                                                                                            |            |          |          |             |           |
|------------------------------------------------------------------------------------------------------------|------------|----------|----------|-------------|-----------|
| organic hydroxy compound biosynthetic process                                                              | GO:1901617 | 3.93E-03 | 2.60E-02 | -0.83,-0.77 | 0.03,0.05 |
| nucleoside catabolic process                                                                               | GO:0009164 | 3.97E-03 | 2.62E-02 | -0.38,-0.35 | 0.2,0.21  |
| vascular endothelial growth factor receptor signaling pathway                                              | GO:0048010 | 4.10E-03 | 2.65E-02 | -0.19,-0.14 | 0.27,0.28 |
| response to superoxide                                                                                     | GO:0000303 | 4.16E-03 | 2.65E-02 | -0.51,-0.49 | 0.15,0.15 |
| response to pH                                                                                             | GO:0009268 | 4.16E-03 | 2.65E-02 | -0.03,0.07  | 0.33,0.36 |
| negative regulation of binding                                                                             | GO:0051100 | 4.26E-03 | 2.65E-02 | -0.62,-0.59 | 0.11,0.11 |
| dihydrofolate metabolic process                                                                            | GO:0046452 | 4.34E-03 | 2.65E-02 | 0.0,0.0     | 0.34,0.34 |
| positive regulation of aconitate hydratase activity                                                        | GO:1904234 | 4.34E-03 | 2.65E-02 | 0.0,0.0     | 0.34,0.34 |
| viral penetration into host nucleus                                                                        | GO:0075732 | 4.34E-03 | 2.65E-02 | 0.0,0.0     | 0.34,0.34 |
| histone H3-R26 citrullination                                                                              | GO:0036413 | 4.34E-03 | 2.65E-02 | 0.0,0.0     | 0.34,0.34 |
| AMP catabolic process                                                                                      | GO:0006196 | 4.34E-03 | 2.65E-02 | 0.0,0.0     | 0.34,0.34 |
| regulation of aspartic-type peptidase activity                                                             | GO:1905245 | 4.34E-03 | 2.65E-02 | 0.0,0.0     | 0.34,0.34 |
| positive regulation of female gonad development                                                            | GO:2000196 | 4.34E-03 | 2.65E-02 | 0.0,0.0     | 0.34,0.34 |
| regulation of early endosome to recycling endosome transport                                               | GO:1902954 | 4.34E-03 | 2.65E-02 | 0.0,0.0     | 0.34,0.34 |
| hypochlorous acid metabolic process                                                                        | GO:0002148 | 4.34E-03 | 2.65E-02 | 0.0,0.0     | 0.34,0.34 |
| regulation of metalloendopeptidase activity involved in amyloid precursor protein catabolic process        | GO:1902962 | 4.34E-03 | 2.65E-02 | 0.0,0.0     | 0.34,0.34 |
| regulation of succinate dehydrogenase activity                                                             | GO:1904229 | 4.34E-03 | 2.65E-02 | 0.0,0.0     | 0.34,0.34 |
| positive regulation of interleukin-18 production                                                           | GO:0032741 | 4.34E-03 | 2.65E-02 | 0.0,0.0     | 0.34,0.34 |
| metal incorporation into metallo-sulfur cluster                                                            | GO:0018282 | 4.34E-03 | 2.65E-02 | 0.0,0.0     | 0.34,0.34 |
| regulation of progesterone secretion                                                                       | GO:2000870 | 4.34E-03 | 2.65E-02 | 0.0,0.0     | 0.34,0.34 |
| hypochlorous acid biosynthetic process                                                                     | GO:0002149 | 4.34E-03 | 2.65E-02 | 0.0,0.0     | 0.34,0.34 |
| regulation of aspartic-type endopeptidase activity involved in amyloid precursor protein catabolic process | GO:1902959 | 4.34E-03 | 2.65E-02 | 0.0,0.0     | 0.34,0.34 |
| negative regulation of metalloendopeptidase activity involved in                                           | GO:1902963 | 4.34E-03 | 2.65E-02 | 0.0,0.0     | 0.34,0.34 |

|                                                                                                                      |            |          |          |               |             |
|----------------------------------------------------------------------------------------------------------------------|------------|----------|----------|---------------|-------------|
| amyloid precursor<br>protein catabolic process                                                                       |            |          |          |               |             |
| response to defense-<br>related nitric oxide<br>production by other<br>organism involved in<br>symbiotic interaction | GO:0052551 | 4.34E-03 | 2.65E-02 | 0.0,0.0       | 0.34,0.34   |
| positive regulation of<br>succinate dehydrogenase<br>activity                                                        | GO:1904231 | 4.34E-03 | 2.65E-02 | 0.0,0.0       | 0.34,0.34   |
| asymmetric Golgi ribbon<br>formation                                                                                 | GO:0090164 | 4.34E-03 | 2.65E-02 | 0.0,0.0       | 0.34,0.34   |
| angiotensin-activated<br>signaling pathway                                                                           | GO:0086098 | 4.34E-03 | 2.65E-02 | 0.0,0.0       | 0.34,0.34   |
| involved in heart process                                                                                            |            |          |          |               |             |
| granuloma formation                                                                                                  | GO:0002432 | 4.34E-03 | 2.65E-02 | 0.0,0.0       | 0.34,0.34   |
| response to defense-<br>related host nitric oxide<br>production                                                      | GO:0052565 | 4.34E-03 | 2.65E-02 | 0.0,0.0       | 0.34,0.34   |
| myoblast migration<br>involved in skeletal<br>muscle regeneration                                                    | GO:0014839 | 4.34E-03 | 2.65E-02 | 0.0,0.0       | 0.34,0.34   |
| regulation of aconitate<br>hydratase activity                                                                        | GO:1904232 | 4.34E-03 | 2.65E-02 | 0.0,0.0       | 0.34,0.34   |
| intestinal epithelial cell<br>migration                                                                              | GO:0061582 | 4.34E-03 | 2.65E-02 | 0.0,0.0       | 0.34,0.34   |
| multi-organism nuclear<br>import                                                                                     | GO:1902594 | 4.34E-03 | 2.65E-02 | 0.0,0.0       | 0.34,0.34   |
| iron incorporation into<br>metallo-sulfur cluster                                                                    | GO:0018283 | 4.34E-03 | 2.65E-02 | 0.0,0.0       | 0.34,0.34   |
| triglyceride catabolic<br>process                                                                                    | GO:0019433 | 4.34E-03 | 2.65E-02 | -0.27,-0.29   | 0.24,0.23   |
| positive regulation of<br>interleukin-8 production                                                                   | GO:0032757 | 4.34E-03 | 2.65E-02 | -0.55,-0.47   | 0.13,0.16   |
| positive regulation of<br>oxidoreductase activity                                                                    | GO:0051353 | 4.34E-03 | 2.65E-02 | -0.27,-0.31   | 0.24,0.22   |
| regulation of biological<br>process                                                                                  | GO:0050789 | 4.37E-03 | 2.66E-02 | -23.41,-23.15 | -8.41,-8.38 |
| embryo development                                                                                                   | GO:0009790 | 4.42E-03 | 2.69E-02 | 1.99,1.96     | 1.08,1.07   |
| iron ion homeostasis                                                                                                 | GO:0055072 | 4.50E-03 | 2.73E-02 | -0.39,-0.44   | 0.19,0.17   |
| reproductive structure<br>development                                                                                | GO:0048608 | 4.56E-03 | 2.76E-02 | -0.36,-0.31   | 0.2,0.22    |
| organic substance<br>metabolic process                                                                               | GO:0071704 | 4.65E-03 | 2.81E-02 | -24.68,-24.78 | -8.89,-9.0  |
| response to oxygen<br>radical                                                                                        | GO:0000305 | 4.73E-03 | 2.83E-02 | -0.51,-0.49   | 0.15,0.15   |
| regulation of bone<br>remodeling                                                                                     | GO:0046850 | 4.73E-03 | 2.83E-02 | -0.04,0.02    | 0.32,0.34   |
| DNA biosynthetic<br>process                                                                                          | GO:0071897 | 4.74E-03 | 2.83E-02 | -0.68,-0.66   | 0.08,0.09   |
| negative regulation of<br>organelle organization                                                                     | GO:0010639 | 4.76E-03 | 2.83E-02 | -0.58,-0.57   | 0.12,0.12   |
| embryonic organ<br>development                                                                                       | GO:0048568 | 4.76E-03 | 2.83E-02 | 0.36,0.35     | 0.47,0.47   |

|                                                                |            |          |          |               |             |
|----------------------------------------------------------------|------------|----------|----------|---------------|-------------|
| reproductive system development                                | GO:0061458 | 4.76E-03 | 2.83E-02 | -0.36,-0.31   | 0.2,0.22    |
| triglyceride metabolic process                                 | GO:0006641 | 4.84E-03 | 2.87E-02 | -0.44,-0.43   | 0.17,0.17   |
| hematopoietic progenitor cell differentiation                  | GO:0002244 | 4.84E-03 | 2.87E-02 | -0.74,-0.65   | 0.06,0.09   |
| regulation of interleukin-10 production                        | GO:0032653 | 4.93E-03 | 2.92E-02 | 0.08,0.02     | 0.37,0.34   |
| response to abiotic stimulus                                   | GO:0009628 | 5.02E-03 | 2.97E-02 | -2.14,-2.1    | -0.46,-0.45 |
| cellular response to organic cyclic compound                   | GO:0071407 | 5.12E-03 | 3.02E-02 | -3.45,-3.32   | -0.95,-0.92 |
| modification by symbiont of host morphology or physiology      | GO:0044003 | 5.34E-03 | 3.13E-02 | -0.92,-0.95   | -0.0,-0.02  |
| interleukin-10 production                                      | GO:0032613 | 5.34E-03 | 3.13E-02 | 0.08,0.02     | 0.37,0.34   |
| regulation of telomerase activity                              | GO:0051972 | 5.34E-03 | 3.13E-02 | -0.05,0.02    | 0.32,0.34   |
| anatomical structure morphogenesis                             | GO:0009653 | 5.35E-03 | 3.13E-02 | -4.54,-4.66   | -1.36,-1.42 |
| secondary alcohol metabolic process                            | GO:1902652 | 5.37E-03 | 3.13E-02 | -0.17,-0.17   | 0.27,0.27   |
| embryo development ending in birth or egg hatching             | GO:0009792 | 5.61E-03 | 3.27E-02 | 1.48,1.51     | 0.89,0.91   |
| positive regulation of molecular function                      | GO:0044093 | 5.62E-03 | 3.27E-02 | -3.05,-3.09   | -0.8,-0.83  |
| cholesterol metabolic process                                  | GO:0008203 | 5.65E-03 | 3.27E-02 | -0.17,-0.17   | 0.27,0.27   |
| cellular response to insulin stimulus                          | GO:0032869 | 5.65E-03 | 3.27E-02 | -0.63,-0.71   | 0.1,0.07    |
| glycosyl compound catabolic process                            | GO:1901658 | 5.76E-03 | 3.33E-02 | -0.38,-0.35   | 0.2,0.21    |
| signal transduction                                            | GO:0007165 | 5.80E-03 | 3.34E-02 | -13.68,-13.39 | -4.77,-4.71 |
| single organism cell adhesion                                  | GO:0098602 | 5.82E-03 | 3.35E-02 | -1.68,-1.62   | -0.29,-0.27 |
| cellular biogenic amine metabolic process                      | GO:0006576 | 5.84E-03 | 3.35E-02 | -0.57,-0.5    | 0.13,0.15   |
| trivalent inorganic cation transport                           | GO:0072512 | 5.98E-03 | 3.38E-02 | -0.49,-0.54   | 0.16,0.13   |
| ferric iron transport                                          | GO:0015682 | 5.98E-03 | 3.38E-02 | -0.49,-0.54   | 0.16,0.13   |
| peptidyl-tyrosine autophosphorylation                          | GO:0038083 | 6.03E-03 | 3.38E-02 | -0.19,-0.14   | 0.27,0.28   |
| positive regulation of NF-kappaB transcription factor activity | GO:0051092 | 6.03E-03 | 3.38E-02 | -0.13,-0.13   | 0.29,0.29   |
| single-organism organelle organization                         | GO:1902589 | 6.10E-03 | 3.38E-02 | -7.04,-7.08   | -2.29,-2.33 |
| lipopolysaccharide-mediated signaling pathway                  | GO:0031663 | 6.20E-03 | 3.38E-02 | -0.35,-0.3    | 0.21,0.22   |
| negative regulation of cell-substrate adhesion                 | GO:0010812 | 6.20E-03 | 3.38E-02 | 0.11,0.21     | 0.38,0.41   |

|                                                                                                        |            |          |          |             |             |
|--------------------------------------------------------------------------------------------------------|------------|----------|----------|-------------|-------------|
| intracellular estrogen<br>receptor signaling<br>pathway                                                | GO:0030520 | 6.20E-03 | 3.38E-02 | 2.59,2.52   | 1.31,1.29   |
| regulation of granulocyte<br>chemotaxis                                                                | GO:0071622 | 6.20E-03 | 3.38E-02 | -0.24,-0.13 | 0.25,0.28   |
| regulation of anatomical<br>structure morphogenesis                                                    | GO:0022603 | 6.21E-03 | 3.38E-02 | -2.24,-2.4  | -0.5,-0.57  |
| cellular response to stress                                                                            | GO:0033554 | 6.22E-03 | 3.38E-02 | -5.05,-5.01 | -1.55,-1.55 |
| regulation of organelle<br>organization                                                                | GO:0033043 | 6.26E-03 | 3.38E-02 | -2.57,-2.6  | -0.62,-0.64 |
| extracellular matrix<br>organization                                                                   | GO:0030198 | 6.27E-03 | 3.38E-02 | -1.96,-1.88 | -0.39,-0.37 |
| defense response to<br>bacterium                                                                       | GO:0042742 | 6.28E-03 | 3.38E-02 | -1.41,-1.31 | -0.19,-0.16 |
| protein import into<br>nucleus                                                                         | GO:0006606 | 6.28E-03 | 3.38E-02 | -1.7,-1.56  | -0.29,-0.25 |
| protein targeting to<br>nucleus                                                                        | GO:0044744 | 6.28E-03 | 3.38E-02 | -1.7,-1.56  | -0.29,-0.25 |
| extracellular structure<br>organization                                                                | GO:0043062 | 6.30E-03 | 3.38E-02 | -1.96,-1.88 | -0.39,-0.37 |
| regulation of T cell<br>proliferation                                                                  | GO:0042129 | 6.33E-03 | 3.38E-02 | -0.13,-0.13 | 0.29,0.29   |
| ERBB signaling pathway                                                                                 | GO:0038127 | 6.34E-03 | 3.38E-02 | -0.76,-0.73 | 0.06,0.06   |
| positive regulation of<br>nitrogen compound<br>metabolic process                                       | GO:0051173 | 6.36E-03 | 3.38E-02 | -5.25,-5.16 | -1.62,-1.61 |
| axon guidance                                                                                          | GO:0007411 | 6.39E-03 | 3.38E-02 | -1.03,-1.02 | -0.05,-0.05 |
| regulation of nervous<br>system development                                                            | GO:0051960 | 6.43E-03 | 3.38E-02 | -1.44,-1.65 | -0.2,-0.29  |
| neuron projection<br>guidance                                                                          | GO:0097485 | 6.49E-03 | 3.38E-02 | -1.03,-1.02 | -0.05,-0.05 |
| central nervous system<br>myelin formation                                                             | GO:0032289 | 6.50E-03 | 3.38E-02 | 0.0,0.0     | 0.34,0.34   |
| T-helper 1 cell activation                                                                             | GO:0035711 | 6.50E-03 | 3.38E-02 | 0.0,0.0     | 0.34,0.34   |
| D-xylose metabolic<br>process                                                                          | GO:0042732 | 6.50E-03 | 3.38E-02 | 0.0,0.0     | 0.34,0.34   |
| dADP metabolic process                                                                                 | GO:0046056 | 6.50E-03 | 3.38E-02 | 0.0,0.0     | 0.34,0.34   |
| granzyme B production                                                                                  | GO:0071613 | 6.50E-03 | 3.38E-02 | 0.0,0.0     | 0.34,0.34   |
| cobalamin biosynthetic<br>process                                                                      | GO:0009236 | 6.50E-03 | 3.38E-02 | 0.0,0.0     | 0.34,0.34   |
| regulation of<br>opsonization                                                                          | GO:1903027 | 6.50E-03 | 3.38E-02 | 0.0,0.0     | 0.34,0.34   |
| regulation of granzyme B<br>production                                                                 | GO:0071661 | 6.50E-03 | 3.38E-02 | 0.0,0.0     | 0.34,0.34   |
| positive regulation by<br>symbiont of host defense<br>response                                         | GO:0052509 | 6.50E-03 | 3.38E-02 | 0.0,0.0     | 0.34,0.34   |
| MAPK import into<br>nucleus                                                                            | GO:0000189 | 6.50E-03 | 3.38E-02 | 0.0,0.0     | 0.34,0.34   |
| modulation by organism<br>of immune response of<br>other organism involved<br>in symbiotic interaction | GO:0052552 | 6.50E-03 | 3.38E-02 | 0.0,0.0     | 0.34,0.34   |

|                                                                                                         |            |          |          |             |             |
|---------------------------------------------------------------------------------------------------------|------------|----------|----------|-------------|-------------|
| positive regulation by organism of defense response of other organism involved in symbiotic interaction | GO:0052510 | 6.50E-03 | 3.38E-02 | 0.0,0.0     | 0.34,0.34   |
| cellular response to triacyl bacterial lipopeptide                                                      | GO:0071727 | 6.50E-03 | 3.38E-02 | 0.0,0.0     | 0.34,0.34   |
| cellular response to progesterone stimulus                                                              | GO:0071393 | 6.50E-03 | 3.38E-02 | 0.0,0.0     | 0.34,0.34   |
| positive regulation of granzyme B production                                                            | GO:0071663 | 6.50E-03 | 3.38E-02 | 0.0,0.0     | 0.34,0.34   |
| modulation by symbiont of host immune response                                                          | GO:0052553 | 6.50E-03 | 3.38E-02 | 0.0,0.0     | 0.34,0.34   |
| cell surface pattern recognition receptor signaling pathway                                             | GO:0002752 | 6.50E-03 | 3.38E-02 | 0.0,0.0     | 0.34,0.34   |
| antibiotic transport                                                                                    | GO:0042891 | 6.50E-03 | 3.38E-02 | 0.0,0.0     | 0.34,0.34   |
| diacylglycerol catabolic process                                                                        | GO:0046340 | 6.50E-03 | 3.38E-02 | 0.0,0.0     | 0.34,0.34   |
| protein targeting to lysosome involved in chaperone-mediated autophagy                                  | GO:0061740 | 6.50E-03 | 3.38E-02 | 0.0,0.0     | 0.34,0.34   |
| modulation by symbiont of host defense response                                                         | GO:0052031 | 6.50E-03 | 3.38E-02 | 0.0,0.0     | 0.34,0.34   |
| cell septum assembly                                                                                    | GO:0090529 | 6.50E-03 | 3.38E-02 | 0.0,0.0     | 0.34,0.34   |
| guanosine-containing compound catabolic process                                                         | GO:1901069 | 6.50E-03 | 3.38E-02 | 0.0,0.0     | 0.34,0.34   |
| regulation of neurofibrillary tangle assembly                                                           | GO:1902996 | 6.50E-03 | 3.38E-02 | 0.0,0.0     | 0.34,0.34   |
| dGDP metabolic process                                                                                  | GO:0046066 | 6.50E-03 | 3.38E-02 | 0.0,0.0     | 0.34,0.34   |
| modulation by organism of defense response of other organism involved in symbiotic interaction          | GO:0052255 | 6.50E-03 | 3.38E-02 | 0.0,0.0     | 0.34,0.34   |
| barrier septum assembly                                                                                 | GO:0000917 | 6.50E-03 | 3.38E-02 | 0.0,0.0     | 0.34,0.34   |
| induction by organism of defense response of other organism involved in symbiotic interaction           | GO:0052251 | 6.50E-03 | 3.38E-02 | 0.0,0.0     | 0.34,0.34   |
| small molecule catabolic process                                                                        | GO:0044282 | 6.59E-03 | 3.42E-02 | -1.07,-1.07 | -0.06,-0.07 |
| tetrapyrrole biosynthetic process                                                                       | GO:0033014 | 6.65E-03 | 3.44E-02 | 0.53,0.58   | 0.54,0.55   |
| cellular response to hormone stimulus                                                                   | GO:0032870 | 6.67E-03 | 3.45E-02 | -3.63,-3.62 | -1.02,-1.03 |
| developmental process involved in reproduction                                                          | GO:0003006 | 6.77E-03 | 3.49E-02 | -1.34,-1.24 | -0.16,-0.13 |
| purine nucleotide catabolic process                                                                     | GO:0006195 | 6.88E-03 | 3.54E-02 | -0.38,-0.35 | 0.2,0.21    |
| regulation of interleukin-12 production                                                                 | GO:0032655 | 6.88E-03 | 3.54E-02 | 0.08,0.02   | 0.37,0.34   |

|                                                                 |            |          |          |             |             |
|-----------------------------------------------------------------|------------|----------|----------|-------------|-------------|
| regulation of multi-organism process                            | GO:0043900 | 7.11E-03 | 3.65E-02 | -1.26,-1.14 | -0.13,-0.09 |
| regulation of molecular function                                | GO:0065009 | 7.15E-03 | 3.67E-02 | -4.06,-4.13 | -1.18,-1.22 |
| positive regulation of MAP kinase activity                      | GO:0043406 | 7.23E-03 | 3.70E-02 | 0.8,0.79    | 0.64,0.63   |
| modification of morphology or physiology of other organism      | GO:0035821 | 7.28E-03 | 3.72E-02 | 0.21,0.14   | 0.42,0.39   |
| interleukin-12 production                                       | GO:0032615 | 7.36E-03 | 3.75E-02 | 0.08,0.02   | 0.37,0.34   |
| positive regulation of Wnt signaling pathway                    | GO:0030177 | 7.39E-03 | 3.76E-02 | 0.21,0.14   | 0.42,0.39   |
| regulation of T cell activation                                 | GO:0050863 | 7.44E-03 | 3.78E-02 | 0.25,0.25   | 0.43,0.43   |
| stress-activated MAPK cascade                                   | GO:0051403 | 7.59E-03 | 3.85E-02 | -0.1,0.1    | 0.3,0.38    |
| bone resorption                                                 | GO:0045453 | 7.85E-03 | 3.96E-02 | -0.04,0.02  | 0.32,0.34   |
| regulation of lamellipodium organization                        | GO:1902743 | 7.85E-03 | 3.96E-02 | 0.02,0.06   | 0.35,0.36   |
| positive regulation of metabolic process                        | GO:0009893 | 7.88E-03 | 3.97E-02 | -7.22,-7.33 | -2.36,-2.43 |
| positive regulation of macromolecule biosynthetic process       | GO:0010557 | 7.97E-03 | 4.01E-02 | -3.91,-3.9  | -1.12,-1.13 |
| positive regulation of macromolecule metabolic process          | GO:0010604 | 8.01E-03 | 4.02E-02 | -6.11,-6.21 | -1.94,-2.0  |
| phagosome maturation                                            | GO:0090382 | 8.10E-03 | 4.06E-02 | -0.49,-0.48 | 0.16,0.16   |
| macromolecular complex assembly                                 | GO:0065003 | 8.12E-03 | 4.06E-02 | -3.76,-3.64 | -1.07,-1.04 |
| regulation of leukocyte migration                               | GO:0002685 | 8.20E-03 | 4.09E-02 | -0.37,-0.29 | 0.2,0.23    |
| negative regulation of developmental process                    | GO:0051093 | 8.29E-03 | 4.13E-02 | -1.78,-1.78 | -0.33,-0.34 |
| neuron projection development                                   | GO:0031175 | 8.44E-03 | 4.13E-02 | -1.99,-2.34 | -0.4,-0.55  |
| leukocyte differentiation                                       | GO:0002521 | 8.51E-03 | 4.13E-02 | -0.32,-0.26 | 0.22,0.24   |
| sterol metabolic process                                        | GO:0016125 | 8.56E-03 | 4.13E-02 | -0.17,-0.17 | 0.27,0.27   |
| response to toxic substance                                     | GO:0009636 | 8.58E-03 | 4.13E-02 | -0.85,-0.79 | 0.02,0.04   |
| regulation of leukocyte cell-cell adhesion                      | GO:1903037 | 8.58E-03 | 4.13E-02 | 0.25,0.25   | 0.43,0.43   |
| regulation of interleukin-8 production                          | GO:0032677 | 8.61E-03 | 4.13E-02 | -0.55,-0.47 | 0.13,0.16   |
| regulation of glial cell differentiation                        | GO:0045685 | 8.61E-03 | 4.13E-02 | -0.35,-0.28 | 0.21,0.23   |
| peptidyl-arginine methylation, to symmetrical-dimethyl arginine | GO:0019918 | 8.65E-03 | 4.13E-02 | 0.0,0.0     | 0.34,0.34   |
| regulation of Golgi inheritance                                 | GO:0090170 | 8.65E-03 | 4.13E-02 | 0.0,0.0     | 0.34,0.34   |



|                                                          |            |          |          |             |             |
|----------------------------------------------------------|------------|----------|----------|-------------|-------------|
| early endosome to recycling endosome transport           | GO:0061502 | 8.65E-03 | 4.13E-02 | 0.0,0.0     | 0.34,0.34   |
| detection of diacyl bacterial lipopeptide                | GO:0042496 | 8.65E-03 | 4.13E-02 | 0.0,0.0     | 0.34,0.34   |
| xylulose metabolic process                               | GO:0005997 | 8.65E-03 | 4.13E-02 | 0.0,0.0     | 0.34,0.34   |
| proprioception                                           | GO:0019230 | 8.65E-03 | 4.13E-02 | 0.0,0.0     | 0.34,0.34   |
| purine deoxyribonucleoside diphosphate metabolic process | GO:0009182 | 8.65E-03 | 4.13E-02 | 0.0,0.0     | 0.34,0.34   |
| unidimensional cell growth                               | GO:0009826 | 8.65E-03 | 4.13E-02 | 0.0,0.0     | 0.34,0.34   |
| progesterone secretion                                   | GO:0042701 | 8.65E-03 | 4.13E-02 | 0.0,0.0     | 0.34,0.34   |
| microglia differentiation                                | GO:0014004 | 8.65E-03 | 4.13E-02 | 0.0,0.0     | 0.34,0.34   |
| positive regulation of pinocytosis                       | GO:0048549 | 8.65E-03 | 4.13E-02 | 0.0,0.0     | 0.34,0.34   |
| cellular response to diacyl bacterial lipopeptide        | GO:0071726 | 8.65E-03 | 4.13E-02 | 0.0,0.0     | 0.34,0.34   |
| neurofibrillary tangle assembly                          | GO:1902988 | 8.65E-03 | 4.13E-02 | 0.0,0.0     | 0.34,0.34   |
| response to molecule of fungal origin                    | GO:0002238 | 8.65E-03 | 4.13E-02 | 0.0,0.0     | 0.34,0.34   |
| positive regulation of sodium:proton antiporter activity | GO:0032417 | 8.65E-03 | 4.13E-02 | 0.0,0.0     | 0.34,0.34   |
| negative regulation of metalloendopeptidase activity     | GO:1904684 | 8.65E-03 | 4.13E-02 | 0.0,0.0     | 0.34,0.34   |
| microglia development                                    | GO:0014005 | 8.65E-03 | 4.13E-02 | 0.0,0.0     | 0.34,0.34   |
| protein targeting to vacuole involved in autophagy       | GO:0071211 | 8.65E-03 | 4.13E-02 | 0.0,0.0     | 0.34,0.34   |
| organophosphate ester transport                          | GO:0015748 | 8.68E-03 | 4.13E-02 | -0.58,-0.54 | 0.12,0.13   |
| myeloid cell development                                 | GO:0061515 | 8.87E-03 | 4.22E-02 | 0.02,0.01   | 0.35,0.34   |
| axon development                                         | GO:0061564 | 8.91E-03 | 4.23E-02 | -1.58,-1.69 | -0.25,-0.3  |
| regulation of hemopoiesis                                | GO:1903706 | 9.41E-03 | 4.46E-02 | -0.84,-0.79 | 0.02,0.04   |
| multicellular organismal homeostasis                     | GO:0048871 | 9.58E-03 | 4.53E-02 | 0.03,0.1    | 0.35,0.37   |
| organonitrogen compound catabolic process                | GO:1901565 | 9.64E-03 | 4.56E-02 | -1.96,-1.82 | -0.39,-0.35 |
| neuron differentiation                                   | GO:0030182 | 9.66E-03 | 4.56E-02 | -2.35,-2.67 | -0.54,-0.67 |
| transition metal ion homeostasis                         | GO:0055076 | 9.82E-03 | 4.62E-02 | -0.39,-0.44 | 0.19,0.17   |
| receptor-mediated endocytosis                            | GO:0006898 | 9.90E-03 | 4.66E-02 | -0.56,-0.43 | 0.13,0.17   |
| response to fungus                                       | GO:0009620 | 9.95E-03 | 4.66E-02 | -0.59,-0.51 | 0.12,0.14   |
| positive regulation of DNA biosynthetic process          | GO:2000573 | 9.95E-03 | 4.66E-02 | -0.05,0.02  | 0.32,0.34   |
| interleukin-8 production                                 | GO:0032637 | 1.02E-02 | 4.78E-02 | -0.55,-0.47 | 0.13,0.16   |

|                                                                                  |            |          |          |             |            |
|----------------------------------------------------------------------------------|------------|----------|----------|-------------|------------|
| purine-containing compound catabolic process                                     | GO:0072523 | 1.02E-02 | 4.78E-02 | -0.38,-0.35 | 0.2,0.21   |
| positive regulation of protein complex assembly                                  | GO:0031334 | 1.03E-02 | 4.79E-02 | -0.93,-0.86 | -0.01,0.01 |
| toll-like receptor TLR6:TLR2 signaling pathway                                   | GO:0038124 | 1.05E-02 | 4.82E-02 | -0.35,-0.3  | 0.21,0.22  |
| positive regulation of cellular carbohydrate metabolic process                   | GO:0010676 | 1.05E-02 | 4.82E-02 | 0.15,0.19   | 0.4,0.41   |
| T cell proliferation                                                             | GO:0042098 | 1.06E-02 | 4.82E-02 | -0.13,-0.13 | 0.29,0.29  |
| regulation of ossification                                                       | GO:0030278 | 1.06E-02 | 4.82E-02 | -0.55,-0.48 | 0.13,0.16  |
| protein autophosphorylation                                                      | GO:0046777 | 1.07E-02 | 4.82E-02 | -0.72,-0.9  | 0.07,-0.0  |
| toll-like receptor TLR1:TLR2 signaling pathway                                   | GO:0038123 | 1.08E-02 | 4.82E-02 | -0.35,-0.3  | 0.21,0.22  |
| cellular response to ammonium ion                                                | GO:0071242 | 1.08E-02 | 4.82E-02 | -0.36,-0.37 | 0.21,0.2   |
| positive regulation of endocytic recycling                                       | GO:2001137 | 1.08E-02 | 4.82E-02 | 0.0,0.0     | 0.34,0.34  |
| positive regulation of ER to Golgi vesicle-mediated transport                    | GO:1902953 | 1.08E-02 | 4.82E-02 | 0.0,0.0     | 0.34,0.34  |
| positive regulation of platelet-derived growth factor receptor signaling pathway | GO:0010641 | 1.08E-02 | 4.82E-02 | 0.0,0.0     | 0.34,0.34  |
| glucuronate catabolic process to xylulose 5-phosphate                            | GO:0019640 | 1.08E-02 | 4.82E-02 | 0.0,0.0     | 0.34,0.34  |
| oxygen metabolic process                                                         | GO:0072592 | 1.08E-02 | 4.82E-02 | 0.0,0.0     | 0.34,0.34  |
| histone citrullination                                                           | GO:0036414 | 1.08E-02 | 4.82E-02 | 0.0,0.0     | 0.34,0.34  |
| regulation of caveolin-mediated endocytosis                                      | GO:2001286 | 1.08E-02 | 4.82E-02 | 0.0,0.0     | 0.34,0.34  |
| purine ribonucleoside diphosphate catabolic process                              | GO:0009181 | 1.08E-02 | 4.82E-02 | 0.0,0.0     | 0.34,0.34  |
| purine nucleoside diphosphate catabolic process                                  | GO:0009137 | 1.08E-02 | 4.82E-02 | 0.0,0.0     | 0.34,0.34  |
| positive regulation of protein localization to early endosome                    | GO:1902966 | 1.08E-02 | 4.82E-02 | 0.0,0.0     | 0.34,0.34  |
| glucuronate catabolic process                                                    | GO:0006064 | 1.08E-02 | 4.82E-02 | 0.0,0.0     | 0.34,0.34  |
| NADPH oxidation                                                                  | GO:0070995 | 1.08E-02 | 4.82E-02 | 0.0,0.0     | 0.34,0.34  |
| protein localization to bicellular tight junction                                | GO:1902396 | 1.08E-02 | 4.82E-02 | 0.0,0.0     | 0.34,0.34  |
| response to methotrexate                                                         | GO:0031427 | 1.08E-02 | 4.82E-02 | 0.0,0.0     | 0.34,0.34  |

|                                                                         |            |          |          |               |             |
|-------------------------------------------------------------------------|------------|----------|----------|---------------|-------------|
| regulation of protein localization to early endosome                    | GO:1902965 | 1.08E-02 | 4.82E-02 | 0.0,0.0       | 0.34,0.34   |
| detection of triacyl bacterial lipopeptide                              | GO:0042495 | 1.08E-02 | 4.82E-02 | 0.0,0.0       | 0.34,0.34   |
| progesterone receptor signaling pathway                                 | GO:0050847 | 1.08E-02 | 4.82E-02 | 0.0,0.0       | 0.34,0.34   |
| positive regulation of CD8-positive, alpha-beta T cell proliferation    | GO:2000566 | 1.08E-02 | 4.82E-02 | 0.0,0.0       | 0.34,0.34   |
| xylulose 5-phosphate biosynthetic process                               | GO:1901159 | 1.08E-02 | 4.82E-02 | 0.0,0.0       | 0.34,0.34   |
| xylulose 5-phosphate metabolic process                                  | GO:0051167 | 1.08E-02 | 4.82E-02 | 0.0,0.0       | 0.34,0.34   |
| positive regulation of intracellular transport                          | GO:0032388 | 1.09E-02 | 4.86E-02 | -1.34,-1.27   | -0.16,-0.14 |
| cellular response to stimulus                                           | GO:0051716 | 1.09E-02 | 4.87E-02 | -15.71,-15.37 | -5.53,-5.45 |
| macrophage activation                                                   | GO:0042116 | 1.11E-02 | 4.91E-02 | -0.42,-0.39   | 0.18,0.19   |
| regulation of cytokine production involved in immune response           | GO:0002718 | 1.11E-02 | 4.91E-02 | -0.35,-0.3    | 0.21,0.22   |
| peptidyl-arginine modification                                          | GO:0018195 | 1.11E-02 | 4.91E-02 | 0.26,0.25     | 0.43,0.43   |
| cell morphogenesis involved in differentiation                          | GO:0000904 | 1.12E-02 | 4.94E-02 | -2.01,-2.36   | -0.41,-0.55 |
| positive regulation of nucleobase-containing compound metabolic process | GO:0045935 | 1.12E-02 | 4.94E-02 | -3.91,-3.9    | -1.12,-1.13 |
| regulation of tissue remodeling                                         | GO:0034103 | 1.14E-02 | 5.01E-02 | -0.04,0.02    | 0.32,0.34   |
| homotypic cell-cell adhesion                                            | GO:0034109 | 1.14E-02 | 5.03E-02 | -0.32,-0.26   | 0.22,0.24   |
| intracellular protein transport                                         | GO:0006886 | 1.15E-02 | 5.03E-02 | -4.6,-4.46    | -1.38,-1.34 |
| in utero embryonic development                                          | GO:0001701 | 1.15E-02 | 5.03E-02 | 0.05,0.05     | 0.36,0.35   |
| primary metabolic process                                               | GO:0044238 | 1.15E-02 | 5.03E-02 | -23.84,-23.97 | -8.58,-8.69 |
| glycerophospholipid metabolic process                                   | GO:0006650 | 1.17E-02 | 5.09E-02 | -0.95,-0.84   | -0.02,0.02  |
| astrocyte differentiation                                               | GO:0048708 | 1.17E-02 | 5.09E-02 | -0.27,-0.29   | 0.24,0.22   |
| regulation of phagocytosis                                              | GO:0050764 | 1.17E-02 | 5.09E-02 | -0.42,-0.39   | 0.18,0.19   |
| tissue development                                                      | GO:0009888 | 1.17E-02 | 5.09E-02 | -2.34,-2.36   | -0.53,-0.55 |
| glycerophospholipid biosynthetic process                                | GO:0046474 | 1.22E-02 | 5.28E-02 | -0.77,-0.68   | 0.05,0.08   |
| response to oxygen levels                                               | GO:0070482 | 1.22E-02 | 5.28E-02 | -1.03,-0.91   | -0.05,-0.01 |
| cellular response to drug                                               | GO:0035690 | 1.23E-02 | 5.31E-02 | -0.42,-0.58   | 0.18,0.12   |
| protein metabolic process                                               | GO:0019538 | 1.23E-02 | 5.32E-02 | -13.64,-13.74 | -4.76,-4.84 |
| ammonium ion metabolic process                                          | GO:0097164 | 1.23E-02 | 5.33E-02 | -0.57,-0.5    | 0.13,0.15   |

|                                                                   |            |          |          |             |             |
|-------------------------------------------------------------------|------------|----------|----------|-------------|-------------|
| regulation of intracellular protein transport                     | GO:0033157 | 1.24E-02 | 5.33E-02 | -1.34,-1.27 | -0.16,-0.14 |
| regulation of osteoclast differentiation                          | GO:0045670 | 1.26E-02 | 5.36E-02 | -0.38,-0.35 | 0.2,0.21    |
| lamellipodium assembly                                            | GO:0030032 | 1.26E-02 | 5.36E-02 | -0.63,-0.68 | 0.1,0.08    |
| regulation of cellular response to heat                           | GO:1900034 | 1.26E-02 | 5.36E-02 | -0.25,-0.31 | 0.25,0.22   |
| organic acid metabolic process                                    | GO:0006082 | 1.28E-02 | 5.36E-02 | -2.0,-1.99  | -0.41,-0.41 |
| lipid catabolic process                                           | GO:0016042 | 1.29E-02 | 5.36E-02 | -0.79,-0.76 | 0.04,0.05   |
| response to staurosporine                                         | GO:0072733 | 1.30E-02 | 5.36E-02 | 0.0,0.0     | 0.34,0.34   |
| regulation of CD8-positive, alpha-beta T cell proliferation       | GO:2000564 | 1.30E-02 | 5.36E-02 | 0.0,0.0     | 0.34,0.34   |
| non-canonical Wnt signaling pathway via JNK cascade               | GO:0038031 | 1.30E-02 | 5.36E-02 | 0.0,0.0     | 0.34,0.34   |
| cellular response to bacterial lipoprotein                        | GO:0071220 | 1.30E-02 | 5.36E-02 | 0.0,0.0     | 0.34,0.34   |
| positive regulation of metalloenzyme activity                     | GO:0048554 | 1.30E-02 | 5.36E-02 | 0.0,0.0     | 0.34,0.34   |
| positive regulation of CD8-positive, alpha-beta T cell activation | GO:2001187 | 1.30E-02 | 5.36E-02 | 0.0,0.0     | 0.34,0.34   |
| ferric iron import across plasma membrane                         | GO:0098706 | 1.30E-02 | 5.36E-02 | 0.0,0.0     | 0.34,0.34   |
| response to diacyl bacterial lipopeptide                          | GO:0071724 | 1.30E-02 | 5.36E-02 | 0.0,0.0     | 0.34,0.34   |
| positive regulation of integrin activation                        | GO:0033625 | 1.30E-02 | 5.36E-02 | 0.0,0.0     | 0.34,0.34   |
| regulation of sodium:proton antiporter activity                   | GO:0032415 | 1.30E-02 | 5.36E-02 | 0.0,0.0     | 0.34,0.34   |
| regulation of xenophagy                                           | GO:1904415 | 1.30E-02 | 5.36E-02 | 0.0,0.0     | 0.34,0.34   |
| negative regulation of metalloproteinase activity                 | GO:1905049 | 1.30E-02 | 5.36E-02 | 0.0,0.0     | 0.34,0.34   |
| regulation of metalloendopeptidase activity                       | GO:1904683 | 1.30E-02 | 5.36E-02 | 0.0,0.0     | 0.34,0.34   |
| cellular response to bacterial lipopeptide                        | GO:0071221 | 1.30E-02 | 5.36E-02 | 0.0,0.0     | 0.34,0.34   |
| regulation of interleukin-18 production                           | GO:0032661 | 1.30E-02 | 5.36E-02 | 0.0,0.0     | 0.34,0.34   |
| protein citrullination                                            | GO:0018101 | 1.30E-02 | 5.36E-02 | 0.0,0.0     | 0.34,0.34   |
| regulation of dendritic cell cytokine production                  | GO:0002730 | 1.30E-02 | 5.36E-02 | 0.0,0.0     | 0.34,0.34   |
| snRNA transcription from RNA polymerase III promoter              | GO:0042796 | 1.30E-02 | 5.36E-02 | 0.0,0.0     | 0.34,0.34   |
| cellular response to staurosporine                                | GO:0072734 | 1.30E-02 | 5.36E-02 | 0.0,0.0     | 0.34,0.34   |
| response to triacyl bacterial lipopeptide                         | GO:0071725 | 1.30E-02 | 5.36E-02 | 0.0,0.0     | 0.34,0.34   |

|                                                       |            |          |          |             |             |
|-------------------------------------------------------|------------|----------|----------|-------------|-------------|
| positive regulation of xenophagy                      | GO:1904417 | 1.30E-02 | 5.36E-02 | 0.0,0.0     | 0.34,0.34   |
| lysosomal protein catabolic process                   | GO:1905146 | 1.30E-02 | 5.36E-02 | 0.0,0.0     | 0.34,0.34   |
| toll-like receptor 2 signaling pathway                | GO:0034134 | 1.32E-02 | 5.44E-02 | -0.35,-0.3  | 0.21,0.22   |
| regulation of neurogenesis                            | GO:0050767 | 1.32E-02 | 5.44E-02 | -1.09,-1.28 | -0.07,-0.15 |
| cell morphogenesis involved in neuron differentiation | GO:0048667 | 1.32E-02 | 5.44E-02 | -1.7,-2.01  | -0.3,-0.42  |
| dephosphorylation                                     | GO:0016311 | 1.32E-02 | 5.44E-02 | -0.93,-0.98 | -0.01,-0.03 |
| glial cell differentiation                            | GO:0010001 | 1.34E-02 | 5.51E-02 | -0.48,-0.44 | 0.16,0.17   |
| enzyme linked receptor protein signaling pathway      | GO:0007167 | 1.34E-02 | 5.51E-02 | -1.74,-1.73 | -0.31,-0.32 |
| mammary gland epithelium development                  | GO:0061180 | 1.35E-02 | 5.52E-02 | 0.04,0.06   | 0.35,0.36   |
| glycosphingolipid metabolic process                   | GO:0006687 | 1.35E-02 | 5.52E-02 | -0.41,-0.44 | 0.18,0.17   |
| ATP metabolic process                                 | GO:0046034 | 1.35E-02 | 5.52E-02 | -0.14,-0.17 | 0.29,0.27   |
| regulation of peptidase activity                      | GO:0052547 | 1.35E-02 | 5.52E-02 | -1.02,-0.99 | -0.04,-0.04 |
| animal organ morphogenesis                            | GO:0009887 | 1.35E-02 | 5.52E-02 | -1.38,-1.39 | -0.18,-0.19 |
| fibril organization                                   | GO:0097435 | 1.36E-02 | 5.52E-02 | -1.34,-1.27 | -0.16,-0.14 |
| negative regulation of homeostatic process            | GO:0032845 | 1.36E-02 | 5.52E-02 | -0.19,-0.14 | 0.27,0.28   |
| organophosphate catabolic process                     | GO:0046434 | 1.37E-02 | 5.56E-02 | -0.64,-0.58 | 0.1,0.12    |
| regulation of JNK cascade                             | GO:0046328 | 1.37E-02 | 5.56E-02 | 0.25,0.44   | 0.43,0.5    |
| phosphatidylcholine metabolic process                 | GO:0046470 | 1.38E-02 | 5.59E-02 | -0.31,-0.27 | 0.22,0.23   |
| positive regulation of carbohydrate metabolic process | GO:0045913 | 1.42E-02 | 5.71E-02 | 0.15,0.19   | 0.4,0.41    |
| protein maturation                                    | GO:0051604 | 1.45E-02 | 5.83E-02 | 0.41,0.4    | 0.49,0.48   |
| regulation of lymphocyte proliferation                | GO:0050670 | 1.46E-02 | 5.86E-02 | -0.13,-0.13 | 0.29,0.29   |
| endosomal transport                                   | GO:0016197 | 1.46E-02 | 5.87E-02 | -0.67,-0.63 | 0.09,0.1    |
| regulation of mononuclear cell proliferation          | GO:0032944 | 1.47E-02 | 5.87E-02 | -0.13,-0.13 | 0.29,0.29   |
| regulation of cellular response to stress             | GO:0080135 | 1.48E-02 | 5.87E-02 | -1.1,-1.38  | -0.07,-0.18 |
| positive regulation of organelle organization         | GO:0010638 | 1.48E-02 | 5.87E-02 | -1.72,-1.69 | -0.31,-0.3  |
| regulation of DNA metabolic process                   | GO:0051052 | 1.50E-02 | 5.87E-02 | -0.28,-0.07 | 0.23,0.31   |
| induction of bacterial agglutination                  | GO:0043152 | 1.51E-02 | 5.87E-02 | 0.0,0.0     | 0.34,0.34   |
| response to immune response of other                  | GO:0052564 | 1.51E-02 | 5.87E-02 | 0.0,0.0     | 0.34,0.34   |

|                                                                 |            |          |          |             |             |
|-----------------------------------------------------------------|------------|----------|----------|-------------|-------------|
| organism involved in<br>symbiotic interaction                   |            |          |          |             |             |
| chaperone cofactor-<br>dependent protein<br>refolding           | GO:0070389 | 1.51E-02 | 5.87E-02 | 0.0,0.0     | 0.34,0.34   |
| protein localization to<br>early endosome                       | GO:1902946 | 1.51E-02 | 5.87E-02 | 0.0,0.0     | 0.34,0.34   |
| regulation of entry of<br>bacterium into host cell              | GO:2000535 | 1.51E-02 | 5.87E-02 | 0.0,0.0     | 0.34,0.34   |
| non-canonical Wnt<br>signaling pathway via<br>MAPK cascade      | GO:0038030 | 1.51E-02 | 5.87E-02 | 0.0,0.0     | 0.34,0.34   |
| response to host immune<br>response                             | GO:0052572 | 1.51E-02 | 5.87E-02 | 0.0,0.0     | 0.34,0.34   |
| positive regulation of<br>natural killer cell<br>proliferation  | GO:0032819 | 1.51E-02 | 5.87E-02 | 0.0,0.0     | 0.34,0.34   |
| CD8-positive, alpha-beta<br>T cell proliferation                | GO:0035740 | 1.51E-02 | 5.87E-02 | 0.0,0.0     | 0.34,0.34   |
| positive regulation of<br>lamellipodium<br>morphogenesis        | GO:2000394 | 1.51E-02 | 5.87E-02 | 0.0,0.0     | 0.34,0.34   |
| positive regulation of<br>metallopeptidase activity             | GO:1905050 | 1.51E-02 | 5.87E-02 | 0.0,0.0     | 0.34,0.34   |
| regulation of myosin-<br>light-chain-phosphatase<br>activity    | GO:0035507 | 1.51E-02 | 5.87E-02 | 0.0,0.0     | 0.34,0.34   |
| cellular response to<br>peptidoglycan                           | GO:0071224 | 1.51E-02 | 5.87E-02 | 0.0,0.0     | 0.34,0.34   |
| tetrahydrofolate<br>biosynthetic process                        | GO:0046654 | 1.51E-02 | 5.87E-02 | 0.0,0.0     | 0.34,0.34   |
| trachea formation                                               | GO:0060440 | 1.51E-02 | 5.87E-02 | 0.0,0.0     | 0.34,0.34   |
| negative regulation of<br>histone H3-K9<br>trimethylation       | GO:1900113 | 1.51E-02 | 5.87E-02 | 0.0,0.0     | 0.34,0.34   |
| ribonucleoside<br>diphosphate catabolic<br>process              | GO:0009191 | 1.51E-02 | 5.87E-02 | 0.0,0.0     | 0.34,0.34   |
| negative regulation of<br>mitochondrial<br>depolarization       | GO:0051902 | 1.51E-02 | 5.87E-02 | 0.0,0.0     | 0.34,0.34   |
| long-chain fatty acid<br>catabolic process                      | GO:0042758 | 1.51E-02 | 5.87E-02 | 0.0,0.0     | 0.34,0.34   |
| vesicle transport along<br>actin filament                       | GO:0030050 | 1.51E-02 | 5.87E-02 | 0.0,0.0     | 0.34,0.34   |
| positive regulation of<br>protein targeting to<br>mitochondrion | GO:1903955 | 1.51E-02 | 5.87E-02 | -0.94,-0.95 | -0.01,-0.02 |
| regulation of<br>chromosome<br>organization                     | GO:0033044 | 1.52E-02 | 5.88E-02 | -0.6,-0.63  | 0.11,0.1    |
| tissue homeostasis                                              | GO:0001894 | 1.52E-02 | 5.89E-02 | 0.15,0.15   | 0.4,0.39    |
| regulation of sequence-<br>specific DNA binding                 | GO:0051090 | 1.53E-02 | 5.91E-02 | -0.64,-0.64 | 0.1,0.1     |

|                                                                          |            |          |          |             |             |
|--------------------------------------------------------------------------|------------|----------|----------|-------------|-------------|
| transcription factor activity                                            |            |          |          |             |             |
| MAPK cascade                                                             | GO:0000165 | 1.54E-02 | 5.93E-02 | -0.67,-0.63 | 0.09,0.1    |
| inflammatory response                                                    | GO:0006954 | 1.54E-02 | 5.94E-02 | -1.34,-1.22 | -0.16,-0.13 |
| fat cell differentiation                                                 | GO:0045444 | 1.57E-02 | 6.06E-02 | -0.87,-0.85 | 0.01,0.02   |
| bone remodeling                                                          | GO:0046849 | 1.58E-02 | 6.07E-02 | -0.04,0.02  | 0.32,0.34   |
| cytokine production involved in immune response                          | GO:0002367 | 1.58E-02 | 6.07E-02 | -0.35,-0.3  | 0.21,0.22   |
| single organismal cell-cell adhesion                                     | GO:0016337 | 1.59E-02 | 6.08E-02 | -1.38,-1.27 | -0.18,-0.14 |
| guanosine-containing compound metabolic process                          | GO:1901068 | 1.61E-02 | 6.17E-02 | -0.38,-0.35 | 0.2,0.21    |
| positive regulation of JUN kinase activity                               | GO:0043507 | 1.61E-02 | 6.17E-02 | 0.48,0.5    | 0.52,0.52   |
| regulation of leukocyte proliferation                                    | GO:0070663 | 1.63E-02 | 6.21E-02 | -0.13,-0.13 | 0.29,0.29   |
| regulation of cell projection organization                               | GO:0031344 | 1.64E-02 | 6.27E-02 | -0.95,-1.15 | -0.02,-0.1  |
| regulation of MAPK cascade                                               | GO:0043408 | 1.68E-02 | 6.39E-02 | -0.1,0.15   | 0.3,0.39    |
| regulation of protein serine/threonine kinase activity                   | GO:0071900 | 1.68E-02 | 6.39E-02 | 0.32,0.34   | 0.46,0.46   |
| positive regulation of type I interferon production                      | GO:0032481 | 1.68E-02 | 6.39E-02 | -0.38,-0.35 | 0.2,0.2     |
| gonad development                                                        | GO:0008406 | 1.71E-02 | 6.39E-02 | -0.7,-0.69  | 0.08,0.07   |
| response to defenses of other organism involved in symbiotic interaction | GO:0052173 | 1.72E-02 | 6.39E-02 | 0.0,0.0     | 0.34,0.34   |
| regulation of pinocytosis                                                | GO:0048548 | 1.72E-02 | 6.39E-02 | 0.0,0.0     | 0.34,0.34   |
| regulation of tau-protein kinase activity                                | GO:1902947 | 1.72E-02 | 6.39E-02 | 0.0,0.0     | 0.34,0.34   |
| detection of bacterial lipopeptide                                       | GO:0070340 | 1.72E-02 | 6.39E-02 | 0.0,0.0     | 0.34,0.34   |
| positive regulation of macrophage cytokine production                    | GO:0060907 | 1.72E-02 | 6.39E-02 | 0.0,0.0     | 0.34,0.34   |
| mitotic cytokinetic process                                              | GO:1902410 | 1.72E-02 | 6.39E-02 | 0.0,0.0     | 0.34,0.34   |
| response to host                                                         | GO:0075136 | 1.72E-02 | 6.39E-02 | 0.0,0.0     | 0.34,0.34   |
| DNA damage induced protein phosphorylation                               | GO:0006975 | 1.72E-02 | 6.39E-02 | 0.0,0.0     | 0.34,0.34   |
| interleukin-18 production                                                | GO:0032621 | 1.72E-02 | 6.39E-02 | 0.0,0.0     | 0.34,0.34   |
| negative regulation of beta-amyloid formation                            | GO:1902430 | 1.72E-02 | 6.39E-02 | 0.0,0.0     | 0.34,0.34   |
| glycine biosynthetic process                                             | GO:0006545 | 1.72E-02 | 6.39E-02 | 0.0,0.0     | 0.34,0.34   |
| negative regulation of membrane depolarization                           | GO:1904180 | 1.72E-02 | 6.39E-02 | 0.0,0.0     | 0.34,0.34   |
| response to host defenses                                                | GO:0052200 | 1.72E-02 | 6.39E-02 | 0.0,0.0     | 0.34,0.34   |

|                                                                 |            |          |          |             |             |
|-----------------------------------------------------------------|------------|----------|----------|-------------|-------------|
| positive regulation of megakaryocyte differentiation            | GO:0045654 | 1.72E-02 | 6.39E-02 | 0.0,0.0     | 0.34,0.34   |
| nucleoside diphosphate catabolic process                        | GO:0009134 | 1.72E-02 | 6.39E-02 | 0.0,0.0     | 0.34,0.34   |
| negative regulation of synapse assembly                         | GO:0051964 | 1.72E-02 | 6.39E-02 | 0.0,0.0     | 0.34,0.34   |
| dendritic cell cytokine production                              | GO:0002371 | 1.72E-02 | 6.39E-02 | 0.0,0.0     | 0.34,0.34   |
| positive regulation of T cell activation                        | GO:0050870 | 1.73E-02 | 6.41E-02 | 0.34,0.33   | 0.47,0.46   |
| negative regulation of growth                                   | GO:0045926 | 1.75E-02 | 6.47E-02 | -0.39,-0.44 | 0.19,0.17   |
| substrate adhesion-dependent cell spreading                     | GO:0034446 | 1.75E-02 | 6.48E-02 | 0.11,0.21   | 0.38,0.41   |
| protein targeting to vacuole                                    | GO:0006623 | 1.79E-02 | 6.59E-02 | -0.43,-0.34 | 0.18,0.21   |
| positive regulation of myeloid cell differentiation             | GO:0045639 | 1.79E-02 | 6.59E-02 | -0.46,-0.44 | 0.17,0.17   |
| development of primary sexual characteristics                   | GO:0045137 | 1.81E-02 | 6.64E-02 | -0.7,-0.69  | 0.08,0.07   |
| phospholipid biosynthetic process                               | GO:0008654 | 1.81E-02 | 6.65E-02 | -0.77,-0.68 | 0.05,0.08   |
| glycerolipid biosynthetic process                               | GO:0045017 | 1.82E-02 | 6.69E-02 | -0.77,-0.68 | 0.05,0.08   |
| nitric oxide metabolic process                                  | GO:0046209 | 1.83E-02 | 6.69E-02 | -0.34,-0.27 | 0.21,0.23   |
| positive regulation of homotypic cell-cell adhesion             | GO:0034112 | 1.84E-02 | 6.75E-02 | 0.34,0.33   | 0.47,0.46   |
| neuron development                                              | GO:0048666 | 1.86E-02 | 6.79E-02 | -1.99,-2.34 | -0.4,-0.55  |
| positive regulation of leukocyte chemotaxis                     | GO:0002690 | 1.86E-02 | 6.79E-02 | -0.24,-0.13 | 0.25,0.28   |
| T cell costimulation                                            | GO:0031295 | 1.86E-02 | 6.79E-02 | 0.32,0.26   | 0.46,0.44   |
| cellular homeostasis                                            | GO:0019725 | 1.88E-02 | 6.83E-02 | -1.74,-1.67 | -0.31,-0.29 |
| negative regulation of molecular function                       | GO:0044092 | 1.88E-02 | 6.83E-02 | -1.58,-1.5  | -0.25,-0.23 |
| cellular amine metabolic process                                | GO:0044106 | 1.88E-02 | 6.83E-02 | -0.57,-0.5  | 0.13,0.15   |
| tetrapyrrole metabolic process                                  | GO:0033013 | 1.90E-02 | 6.83E-02 | 0.53,0.58   | 0.54,0.55   |
| regulation of protein targeting to mitochondrion                | GO:1903214 | 1.90E-02 | 6.83E-02 | -0.94,-0.95 | -0.01,-0.02 |
| positive regulation of protein serine/threonine kinase activity | GO:0071902 | 1.90E-02 | 6.83E-02 | 0.8,0.79    | 0.64,0.63   |
| regulation of angiogenesis                                      | GO:0045765 | 1.92E-02 | 6.83E-02 | -0.37,-0.29 | 0.2,0.23    |
| positive regulation of leukocyte cell-cell adhesion             | GO:1903039 | 1.92E-02 | 6.83E-02 | 0.34,0.33   | 0.47,0.46   |
| iron ion transport                                              | GO:0006826 | 1.94E-02 | 6.83E-02 | -0.49,-0.54 | 0.16,0.13   |



|                                                                                                               |            |          |          |             |             |
|---------------------------------------------------------------------------------------------------------------|------------|----------|----------|-------------|-------------|
| response to fatty acid                                                                                        | GO:0070542 | 1.94E-02 | 6.83E-02 | 0.02,0.01   | 0.35,0.34   |
| establishment of protein<br>localization to vacuole                                                           | GO:0072666 | 1.94E-02 | 6.83E-02 | -0.43,-0.34 | 0.18,0.21   |
| positive regulation of<br>cytokine secretion<br>involved in immune<br>response                                | GO:0002741 | 1.94E-02 | 6.83E-02 | 0.0,0.0     | 0.34,0.34   |
| positive regulation of<br>histone phosphorylation                                                             | GO:0033129 | 1.94E-02 | 6.83E-02 | 0.0,0.0     | 0.34,0.34   |
| activation of cysteine-<br>type endopeptidase<br>activity involved in<br>apoptotic process by<br>cytochrome c | GO:0008635 | 1.94E-02 | 6.83E-02 | 0.0,0.0     | 0.34,0.34   |
| regulation of single<br>stranded viral RNA<br>replication via double<br>stranded DNA<br>intermediate          | GO:0045091 | 1.94E-02 | 6.83E-02 | 0.0,0.0     | 0.34,0.34   |
| G-protein coupled<br>receptor signaling<br>pathway involved in<br>heart process                               | GO:0086103 | 1.94E-02 | 6.83E-02 | 0.0,0.0     | 0.34,0.34   |
| outer ear morphogenesis                                                                                       | GO:0042473 | 1.94E-02 | 6.83E-02 | 0.0,0.0     | 0.34,0.34   |
| ribonucleoside<br>monophosphate catabolic<br>process                                                          | GO:0009158 | 1.94E-02 | 6.83E-02 | 0.0,0.0     | 0.34,0.34   |
| positive regulation of<br>sphingolipid biosynthetic<br>process                                                | GO:0090154 | 1.94E-02 | 6.83E-02 | 0.0,0.0     | 0.34,0.34   |
| actin filament-based<br>transport                                                                             | GO:0099515 | 1.94E-02 | 6.83E-02 | 0.0,0.0     | 0.34,0.34   |
| positive regulation of<br>ceramide biosynthetic<br>process                                                    | GO:2000304 | 1.94E-02 | 6.83E-02 | 0.0,0.0     | 0.34,0.34   |
| purine ribonucleoside<br>monophosphate catabolic<br>process                                                   | GO:0009169 | 1.94E-02 | 6.83E-02 | 0.0,0.0     | 0.34,0.34   |
| regulation of natural<br>killer cell proliferation                                                            | GO:0032817 | 1.94E-02 | 6.83E-02 | 0.0,0.0     | 0.34,0.34   |
| detection of bacterial<br>lipoprotein                                                                         | GO:0042494 | 1.94E-02 | 6.83E-02 | 0.0,0.0     | 0.34,0.34   |
| sphingomyelin catabolic<br>process                                                                            | GO:0006685 | 1.94E-02 | 6.83E-02 | 0.0,0.0     | 0.34,0.34   |
| purine<br>deoxyribonucleotide<br>catabolic process                                                            | GO:0009155 | 1.94E-02 | 6.83E-02 | 0.0,0.0     | 0.34,0.34   |
| neuron projection<br>morphogenesis                                                                            | GO:0048812 | 1.95E-02 | 6.87E-02 | -1.7,-2.01  | -0.3,-0.42  |
| monosaccharide<br>metabolic process                                                                           | GO:0005996 | 1.96E-02 | 6.88E-02 | -0.58,-0.56 | 0.12,0.12   |
| actin filament<br>organization                                                                                | GO:0007015 | 1.96E-02 | 6.89E-02 | -1.19,-1.1  | -0.11,-0.08 |
| positive regulation of cell<br>proliferation                                                                  | GO:0008284 | 1.97E-02 | 6.90E-02 | -1.6,-1.66  | -0.26,-0.29 |

|                                                                               |            |          |          |             |             |
|-------------------------------------------------------------------------------|------------|----------|----------|-------------|-------------|
| reactive nitrogen species<br>metabolic process                                | GO:2001057 | 1.97E-02 | 6.90E-02 | -0.34,-0.27 | 0.21,0.23   |
| lymphocyte<br>costimulation                                                   | GO:0031294 | 1.97E-02 | 6.90E-02 | 0.32,0.26   | 0.46,0.44   |
| regulation of protein<br>stability                                            | GO:0031647 | 1.98E-02 | 6.91E-02 | 0.24,0.16   | 0.43,0.4    |
| organonitrogen<br>compound biosynthetic<br>process                            | GO:1901566 | 1.98E-02 | 6.92E-02 | -3.93,-3.98 | -1.13,-1.16 |
| regulation of<br>oxidoreductase activity                                      | GO:0051341 | 2.01E-02 | 7.01E-02 | -0.27,-0.31 | 0.24,0.22   |
| multicellular organismal<br>reproductive process                              | GO:0048609 | 2.01E-02 | 7.01E-02 | -1.36,-1.22 | -0.17,-0.12 |
| carbohydrate derivative<br>catabolic process                                  | GO:1901136 | 2.02E-02 | 7.02E-02 | -0.54,-0.55 | 0.14,0.13   |
| negative regulation of<br>actin filament<br>polymerization                    | GO:0030837 | 2.05E-02 | 7.10E-02 | -0.49,-0.42 | 0.16,0.18   |
| ovulation cycle process                                                       | GO:0022602 | 2.05E-02 | 7.10E-02 | -0.55,-0.5  | 0.13,0.15   |
| JNK cascade                                                                   | GO:0007254 | 2.06E-02 | 7.12E-02 | 0.25,0.44   | 0.43,0.5    |
| oxidation-reduction<br>process                                                | GO:0055114 | 2.06E-02 | 7.12E-02 | -2.86,-2.77 | -0.73,-0.71 |
| ion homeostasis                                                               | GO:0050801 | 2.08E-02 | 7.18E-02 | -1.47,-1.54 | -0.21,-0.24 |
| purine ribonucleoside<br>triphosphate metabolic<br>process                    | GO:0009205 | 2.08E-02 | 7.18E-02 | -0.14,-0.17 | 0.29,0.27   |
| steroid hormone<br>mediated signaling<br>pathway                              | GO:0043401 | 2.12E-02 | 7.25E-02 | 0.27,0.24   | 0.44,0.43   |
| cellular modified amino<br>acid biosynthetic process                          | GO:0042398 | 2.12E-02 | 7.25E-02 | -0.52,-0.51 | 0.14,0.14   |
| cellular response to<br>peptide hormone<br>stimulus                           | GO:0071375 | 2.14E-02 | 7.25E-02 | -0.63,-0.71 | 0.1,0.07    |
| negative regulation of<br>cellular component<br>movement                      | GO:0051271 | 2.14E-02 | 7.25E-02 | -0.82,-1.03 | 0.03,-0.05  |
| regulation of response to<br>stress                                           | GO:0080134 | 2.14E-02 | 7.25E-02 | -1.65,-1.81 | -0.28,-0.35 |
| cardiac neural crest cell<br>differentiation involved<br>in heart development | GO:0061307 | 2.15E-02 | 7.25E-02 | 0.0,0.0     | 0.34,0.34   |
| xenophagy                                                                     | GO:0098792 | 2.15E-02 | 7.25E-02 | 0.0,0.0     | 0.34,0.34   |
| respiratory burst<br>involved in defense<br>response                          | GO:0002679 | 2.15E-02 | 7.25E-02 | 0.0,0.0     | 0.34,0.34   |
| regulation of CD8-<br>positive, alpha-beta T cell<br>activation               | GO:2001185 | 2.15E-02 | 7.25E-02 | 0.0,0.0     | 0.34,0.34   |
| negative regulation of<br>feeding behavior                                    | GO:2000252 | 2.15E-02 | 7.25E-02 | 0.0,0.0     | 0.34,0.34   |
| establishment of<br>epithelial cell apical/basal<br>polarity                  | GO:0045198 | 2.15E-02 | 7.25E-02 | 0.0,0.0     | 0.34,0.34   |

|                                                                                              |            |          |          |             |             |
|----------------------------------------------------------------------------------------------|------------|----------|----------|-------------|-------------|
| regulation of removal of superoxide radicals                                                 | GO:2000121 | 2.15E-02 | 7.25E-02 | 0.0,0.0     | 0.34,0.34   |
| purine nucleoside monophosphate catabolic process                                            | GO:0009128 | 2.15E-02 | 7.25E-02 | 0.0,0.0     | 0.34,0.34   |
| positive regulation of protein exit from endoplasmic reticulum                               | GO:0070863 | 2.15E-02 | 7.25E-02 | 0.0,0.0     | 0.34,0.34   |
| Bergmann glial cell differentiation                                                          | GO:0060020 | 2.15E-02 | 7.25E-02 | 0.0,0.0     | 0.34,0.34   |
| negative regulation of amyloid precursor protein catabolic process                           | GO:1902992 | 2.15E-02 | 7.25E-02 | 0.0,0.0     | 0.34,0.34   |
| cardiac neural crest cell development involved in heart development                          | GO:0061308 | 2.15E-02 | 7.25E-02 | 0.0,0.0     | 0.34,0.34   |
| positive regulation of hematopoietic progenitor cell differentiation                         | GO:1901534 | 2.15E-02 | 7.25E-02 | 0.0,0.0     | 0.34,0.34   |
| regulation of endocytic recycling                                                            | GO:2001135 | 2.15E-02 | 7.25E-02 | 0.0,0.0     | 0.34,0.34   |
| MyD88-dependent toll-like receptor signaling pathway                                         | GO:0002755 | 2.16E-02 | 7.27E-02 | -0.35,-0.3  | 0.21,0.22   |
| animal organ regeneration                                                                    | GO:0031100 | 2.16E-02 | 7.27E-02 | -0.43,-0.34 | 0.18,0.21   |
| ribonucleoside triphosphate metabolic process                                                | GO:0009199 | 2.16E-02 | 7.27E-02 | -0.14,-0.17 | 0.29,0.27   |
| chordate embryonic development                                                               | GO:0043009 | 2.17E-02 | 7.28E-02 | 0.39,0.38   | 0.49,0.48   |
| response to virus                                                                            | GO:0009615 | 2.18E-02 | 7.30E-02 | -1.33,-1.2  | -0.16,-0.12 |
| signal transduction by protein phosphorylation                                               | GO:0023014 | 2.18E-02 | 7.31E-02 | -0.67,-0.63 | 0.09,0.1    |
| purine nucleoside triphosphate metabolic process                                             | GO:0009144 | 2.19E-02 | 7.33E-02 | -0.14,-0.17 | 0.29,0.27   |
| amine metabolic process                                                                      | GO:0009308 | 2.20E-02 | 7.35E-02 | -0.57,-0.5  | 0.13,0.15   |
| embryonic placenta development                                                               | GO:0001892 | 2.20E-02 | 7.35E-02 | 0.05,0.02   | 0.36,0.34   |
| regulation of gliogenesis                                                                    | GO:0014013 | 2.24E-02 | 7.45E-02 | -0.35,-0.28 | 0.21,0.23   |
| defense response to Gram-positive bacterium                                                  | GO:0050830 | 2.24E-02 | 7.45E-02 | -0.81,-0.76 | 0.04,0.05   |
| chemokine-mediated signaling pathway                                                         | GO:0070098 | 2.24E-02 | 7.45E-02 | -0.12,-0.02 | 0.29,0.33   |
| multicellular organism reproduction                                                          | GO:0032504 | 2.26E-02 | 7.49E-02 | -1.36,-1.22 | -0.17,-0.12 |
| regulation of JUN kinase activity                                                            | GO:0043506 | 2.28E-02 | 7.54E-02 | 0.48,0.5    | 0.52,0.52   |
| modification of morphology or physiology of other organism involved in symbiotic interaction | GO:0051817 | 2.28E-02 | 7.54E-02 | -0.92,-0.95 | -0.0,-0.02  |

|                                                                                    |            |          |          |               |             |
|------------------------------------------------------------------------------------|------------|----------|----------|---------------|-------------|
| positive regulation of T cell proliferation                                        | GO:0042102 | 2.28E-02 | 7.54E-02 | 0.21,0.2      | 0.42,0.41   |
| nucleotide metabolic process                                                       | GO:0009117 | 2.28E-02 | 7.54E-02 | -0.73,-0.73   | 0.07,0.06   |
| nervous system development                                                         | GO:0007399 | 2.30E-02 | 7.59E-02 | -3.1,-3.37    | -0.82,-0.93 |
| protein localization to vacuole                                                    | GO:0072665 | 2.32E-02 | 7.65E-02 | -0.43,-0.34   | 0.18,0.21   |
| purine ribonucleoside monophosphate metabolic process                              | GO:0009167 | 2.34E-02 | 7.65E-02 | -0.14,-0.17   | 0.29,0.27   |
| negative regulation of cell proliferation                                          | GO:0008285 | 2.34E-02 | 7.65E-02 | -1.37,-1.11   | -0.17,-0.08 |
| purine nucleoside monophosphate metabolic process                                  | GO:0009126 | 2.36E-02 | 7.65E-02 | -0.14,-0.17   | 0.29,0.27   |
| regulation of cytokine biosynthetic process                                        | GO:0042035 | 2.36E-02 | 7.65E-02 | -0.44,-0.34   | 0.17,0.21   |
| negative regulation of inclusion body assembly                                     | GO:0090084 | 2.36E-02 | 7.65E-02 | 0.0,0.0       | 0.34,0.34   |
| single stranded viral RNA replication via double stranded DNA intermediate         | GO:0039692 | 2.36E-02 | 7.65E-02 | 0.0,0.0       | 0.34,0.34   |
| response to bacterial lipopeptide                                                  | GO:0070339 | 2.36E-02 | 7.65E-02 | 0.0,0.0       | 0.34,0.34   |
| tetrahydrobiopterin biosynthetic process                                           | GO:0006729 | 2.36E-02 | 7.65E-02 | 0.0,0.0       | 0.34,0.34   |
| regulation of lamellipodium morphogenesis                                          | GO:2000392 | 2.36E-02 | 7.65E-02 | 0.0,0.0       | 0.34,0.34   |
| positive regulation of interferon-gamma secretion                                  | GO:1902715 | 2.36E-02 | 7.65E-02 | 0.0,0.0       | 0.34,0.34   |
| citrulline biosynthetic process                                                    | GO:0019240 | 2.36E-02 | 7.65E-02 | 0.0,0.0       | 0.34,0.34   |
| positive regulation of transcription from RNA polymerase III promoter              | GO:0045945 | 2.36E-02 | 7.65E-02 | 0.0,0.0       | 0.34,0.34   |
| regulation of female gonad development                                             | GO:2000194 | 2.36E-02 | 7.65E-02 | 0.0,0.0       | 0.34,0.34   |
| regulation of integrin activation                                                  | GO:0033623 | 2.36E-02 | 7.65E-02 | 0.0,0.0       | 0.34,0.34   |
| Golgi ribbon formation                                                             | GO:0090161 | 2.36E-02 | 7.65E-02 | 0.0,0.0       | 0.34,0.34   |
| biosynthetic process                                                               | GO:0009058 | 2.38E-02 | 7.69E-02 | -13.39,-13.32 | -4.67,-4.68 |
| nucleoside phosphate metabolic process                                             | GO:0006753 | 2.40E-02 | 7.76E-02 | -0.73,-0.73   | 0.07,0.06   |
| positive regulation of sequence-specific DNA binding transcription factor activity | GO:0051091 | 2.41E-02 | 7.79E-02 | -0.13,-0.13   | 0.29,0.29   |
| regulation of vasculature development                                              | GO:1901342 | 2.46E-02 | 7.93E-02 | -0.37,-0.29   | 0.2,0.23    |

|                                                                                                                  |            |          |          |              |             |
|------------------------------------------------------------------------------------------------------------------|------------|----------|----------|--------------|-------------|
| stress-activated protein kinase signaling cascade                                                                | GO:0031098 | 2.46E-02 | 7.94E-02 | -0.1,0.1     | 0.3,0.38    |
| metal ion homeostasis                                                                                            | GO:0055065 | 2.48E-02 | 7.97E-02 | -1.28,-1.4   | -0.14,-0.19 |
| reactive oxygen species biosynthetic process                                                                     | GO:1903409 | 2.48E-02 | 7.97E-02 | -0.59,-0.51  | 0.12,0.14   |
| negative regulation of protein polymerization                                                                    | GO:0032272 | 2.48E-02 | 7.97E-02 | -0.49,-0.42  | 0.16,0.18   |
| glucose metabolic process                                                                                        | GO:0006006 | 2.50E-02 | 8.02E-02 | -0.19,-0.14  | 0.27,0.28   |
| positive regulation of neurogenesis                                                                              | GO:0050769 | 2.53E-02 | 8.03E-02 | -0.66,-0.65  | 0.09,0.09   |
| gland development                                                                                                | GO:0048732 | 2.56E-02 | 8.03E-02 | -0.75,-0.64  | 0.06,0.1    |
| nitrogen compound metabolic process                                                                              | GO:0006807 | 2.57E-02 | 8.03E-02 | -22.3,-22.38 | -8.0,-8.09  |
| histone H3-K36 demethylation                                                                                     | GO:0070544 | 2.57E-02 | 8.03E-02 | 0.0,0.0      | 0.34,0.34   |
| negative regulation of platelet aggregation                                                                      | GO:0090331 | 2.57E-02 | 8.03E-02 | 0.0,0.0      | 0.34,0.34   |
| positive regulation of transcription from RNA polymerase II promoter in response to endoplasmic reticulum stress | GO:1990440 | 2.57E-02 | 8.03E-02 | 0.0,0.0      | 0.34,0.34   |
| negative regulation of telomerase activity                                                                       | GO:0051974 | 2.57E-02 | 8.03E-02 | 0.0,0.0      | 0.34,0.34   |
| luteinization                                                                                                    | GO:0001553 | 2.57E-02 | 8.03E-02 | 0.0,0.0      | 0.34,0.34   |
| chaperone-mediated autophagy                                                                                     | GO:0061684 | 2.57E-02 | 8.03E-02 | 0.0,0.0      | 0.34,0.34   |
| surfactant homeostasis                                                                                           | GO:0043129 | 2.57E-02 | 8.03E-02 | 0.0,0.0      | 0.34,0.34   |
| protein retention in Golgi apparatus                                                                             | GO:0045053 | 2.57E-02 | 8.03E-02 | 0.0,0.0      | 0.34,0.34   |
| response to bacterial lipoprotein                                                                                | GO:0032493 | 2.57E-02 | 8.03E-02 | 0.0,0.0      | 0.34,0.34   |
| myoblast migration                                                                                               | GO:0051451 | 2.57E-02 | 8.03E-02 | 0.0,0.0      | 0.34,0.34   |
| response to methylmercury                                                                                        | GO:0051597 | 2.57E-02 | 8.03E-02 | 0.0,0.0      | 0.34,0.34   |
| positive regulation of podosome assembly                                                                         | GO:0071803 | 2.57E-02 | 8.03E-02 | 0.0,0.0      | 0.34,0.34   |
| cellular response to lipoteichoic acid                                                                           | GO:0071223 | 2.57E-02 | 8.03E-02 | 0.0,0.0      | 0.34,0.34   |
| response to lipoteichoic acid                                                                                    | GO:0070391 | 2.57E-02 | 8.03E-02 | 0.0,0.0      | 0.34,0.34   |
| regulation of histone H3-K9 trimethylation                                                                       | GO:1900112 | 2.57E-02 | 8.03E-02 | 0.0,0.0      | 0.34,0.34   |
| tetrahydrobiopterin metabolic process                                                                            | GO:0046146 | 2.57E-02 | 8.03E-02 | 0.0,0.0      | 0.34,0.34   |
| regulation of Golgi organization                                                                                 | GO:1903358 | 2.57E-02 | 8.03E-02 | 0.0,0.0      | 0.34,0.34   |
| positive regulation of tumor necrosis factor biosynthetic process                                                | GO:0042535 | 2.57E-02 | 8.03E-02 | 0.0,0.0      | 0.34,0.34   |
| opsonization                                                                                                     | GO:0008228 | 2.57E-02 | 8.03E-02 | 0.0,0.0      | 0.34,0.34   |
| negative regulation of interleukin-17 production                                                                 | GO:0032700 | 2.57E-02 | 8.03E-02 | 0.0,0.0      | 0.34,0.34   |

|                                                                                          |            |          |          |             |             |
|------------------------------------------------------------------------------------------|------------|----------|----------|-------------|-------------|
| positive regulation of myeloid leukocyte cytokine production involved in immune response | GO:0061081 | 2.57E-02 | 8.03E-02 | 0.0,0.0     | 0.34,0.34   |
| cellular carbohydrate metabolic process                                                  | GO:0044262 | 2.59E-02 | 8.07E-02 | -0.79,-0.74 | 0.04,0.06   |
| cellular response to fibroblast growth factor stimulus                                   | GO:0044344 | 2.62E-02 | 8.14E-02 | 0.13,0.16   | 0.39,0.39   |
| lipid biosynthetic process                                                               | GO:0008610 | 2.64E-02 | 8.22E-02 | -1.2,-1.08  | -0.11,-0.07 |
| positive regulation of cellular metabolic process                                        | GO:0031325 | 2.66E-02 | 8.25E-02 | -6.06,-6.14 | -1.93,-1.98 |
| cellular response to peptide                                                             | GO:1901653 | 2.69E-02 | 8.31E-02 | -0.63,-0.71 | 0.1,0.07    |
| regulation of phosphate metabolic process                                                | GO:0019220 | 2.69E-02 | 8.31E-02 | -2.07,-2.22 | -0.43,-0.5  |
| axonogenesis                                                                             | GO:0007409 | 2.69E-02 | 8.31E-02 | -1.03,-1.02 | -0.05,-0.05 |
| granulocyte chemotaxis                                                                   | GO:0071621 | 2.69E-02 | 8.31E-02 | -0.24,-0.13 | 0.25,0.28   |
| female gonad development                                                                 | GO:0008585 | 2.69E-02 | 8.31E-02 | -0.55,-0.5  | 0.13,0.15   |
| nucleoside triphosphate metabolic process                                                | GO:0009141 | 2.70E-02 | 8.34E-02 | -0.14,-0.17 | 0.29,0.27   |
| positive regulation of cell-cell adhesion                                                | GO:0022409 | 2.71E-02 | 8.35E-02 | 0.34,0.33   | 0.47,0.46   |
| ribonucleoside monophosphate metabolic process                                           | GO:0009161 | 2.72E-02 | 8.38E-02 | -0.14,-0.17 | 0.29,0.27   |
| positive regulation of establishment of protein localization to mitochondrion            | GO:1903749 | 2.73E-02 | 8.41E-02 | -0.94,-0.95 | -0.01,-0.02 |
| water-soluble vitamin metabolic process                                                  | GO:0006767 | 2.78E-02 | 8.44E-02 | -0.02,-0.02 | 0.33,0.33   |
| response to fibroblast growth factor                                                     | GO:0071774 | 2.78E-02 | 8.44E-02 | 0.13,0.16   | 0.39,0.39   |
| protein localization to cell junction                                                    | GO:1902414 | 2.79E-02 | 8.44E-02 | 0.0,0.0     | 0.34,0.34   |
| regulation of establishment of endothelial barrier                                       | GO:1903140 | 2.79E-02 | 8.44E-02 | 0.0,0.0     | 0.34,0.34   |
| regulation of endothelial cell development                                               | GO:1901550 | 2.79E-02 | 8.44E-02 | 0.0,0.0     | 0.34,0.34   |
| low-density lipoprotein particle remodeling                                              | GO:0034374 | 2.79E-02 | 8.44E-02 | 0.0,0.0     | 0.34,0.34   |
| regulation of macrophage cytokine production                                             | GO:0010935 | 2.79E-02 | 8.44E-02 | 0.0,0.0     | 0.34,0.34   |
| protein autoprocessing                                                                   | GO:0016540 | 2.79E-02 | 8.44E-02 | 0.0,0.0     | 0.34,0.34   |
| Rap protein signal transduction                                                          | GO:0032486 | 2.79E-02 | 8.44E-02 | 0.0,0.0     | 0.34,0.34   |
| positive regulation of insulin receptor signaling pathway                                | GO:0046628 | 2.79E-02 | 8.44E-02 | 0.0,0.0     | 0.34,0.34   |

|                                                                           |            |          |          |               |             |
|---------------------------------------------------------------------------|------------|----------|----------|---------------|-------------|
| nucleoside<br>monophosphate catabolic<br>process                          | GO:0009125 | 2.79E-02 | 8.44E-02 | 0.0,0.0       | 0.34,0.34   |
| negative regulation of<br>histone H3-K9<br>methylation                    | GO:0051573 | 2.79E-02 | 8.44E-02 | 0.0,0.0       | 0.34,0.34   |
| regulation of beta-<br>amyloid formation                                  | GO:1902003 | 2.79E-02 | 8.44E-02 | 0.0,0.0       | 0.34,0.34   |
| positive regulation of<br>inositol phosphate<br>biosynthetic process      | GO:0060732 | 2.79E-02 | 8.44E-02 | 0.0,0.0       | 0.34,0.34   |
| regulation of phosphorus<br>metabolic process                             | GO:0051174 | 2.79E-02 | 8.44E-02 | -2.07,-2.22   | -0.43,-0.5  |
| mitochondrion<br>organization                                             | GO:0007005 | 2.80E-02 | 8.45E-02 | 0.59,0.47     | 0.56,0.51   |
| gliogenesis                                                               | GO:0042063 | 2.80E-02 | 8.46E-02 | -0.48,-0.44   | 0.16,0.17   |
| regulation of homeostatic<br>process                                      | GO:0032844 | 2.80E-02 | 8.46E-02 | -0.62,-0.64   | 0.11,0.09   |
| positive regulation of cell<br>differentiation                            | GO:0045597 | 2.82E-02 | 8.49E-02 | -1.2,-1.13    | -0.11,-0.09 |
| regulation of interleukin-<br>6 production                                | GO:0032675 | 2.82E-02 | 8.49E-02 | -0.44,-0.34   | 0.17,0.21   |
| regulation of leukocyte<br>chemotaxis                                     | GO:0002688 | 2.86E-02 | 8.58E-02 | -0.24,-0.13   | 0.25,0.28   |
| cellular response to heat                                                 | GO:0034605 | 2.86E-02 | 8.58E-02 | -0.25,-0.31   | 0.25,0.22   |
| cytokine biosynthetic<br>process                                          | GO:0042089 | 2.86E-02 | 8.58E-02 | -0.44,-0.34   | 0.17,0.21   |
| cellular iron ion<br>homeostasis                                          | GO:0006879 | 2.86E-02 | 8.58E-02 | -0.23,-0.24   | 0.25,0.25   |
| negative regulation of<br>homotypic cell-cell<br>adhesion                 | GO:0034111 | 2.91E-02 | 8.68E-02 | -0.38,-0.35   | 0.2,0.21    |
| development of primary<br>female sexual<br>characteristics                | GO:0046545 | 2.91E-02 | 8.68E-02 | -0.55,-0.5    | 0.13,0.15   |
| toll-like receptor 4<br>signaling pathway                                 | GO:0034142 | 2.91E-02 | 8.68E-02 | -0.35,-0.3    | 0.21,0.22   |
| regulation of lymphocyte<br>activation                                    | GO:0051249 | 2.92E-02 | 8.71E-02 | 0.25,0.25     | 0.43,0.43   |
| negative regulation of<br>nervous system<br>development                   | GO:0051961 | 2.95E-02 | 8.71E-02 | -0.54,-0.47   | 0.14,0.16   |
| cytokine metabolic<br>process                                             | GO:0042107 | 2.95E-02 | 8.71E-02 | -0.44,-0.34   | 0.17,0.21   |
| positive regulation of<br>catalytic activity                              | GO:0043085 | 2.97E-02 | 8.71E-02 | -2.38,-2.39   | -0.55,-0.56 |
| organic substance<br>biosynthetic process                                 | GO:1901576 | 2.99E-02 | 8.71E-02 | -13.01,-12.96 | -4.53,-4.54 |
| regulation of interferon-<br>gamma secretion                              | GO:1902713 | 3.00E-02 | 8.71E-02 | 0.0,0.0       | 0.34,0.34   |
| negative regulation of<br>substrate adhesion-<br>dependent cell spreading | GO:1900025 | 3.00E-02 | 8.71E-02 | 0.0,0.0       | 0.34,0.34   |

|                                                    |            |          |          |             |             |
|----------------------------------------------------|------------|----------|----------|-------------|-------------|
| protein localization to endosome                   | GO:0036010 | 3.00E-02 | 8.71E-02 | 0.0,0.0     | 0.34,0.34   |
| regulation of histone phosphorylation              | GO:0033127 | 3.00E-02 | 8.71E-02 | 0.0,0.0     | 0.34,0.34   |
| positive regulation of steroid hormone secretion   | GO:2000833 | 3.00E-02 | 8.71E-02 | 0.0,0.0     | 0.34,0.34   |
| negative regulation of astrocyte differentiation   | GO:0048712 | 3.00E-02 | 8.71E-02 | 0.0,0.0     | 0.34,0.34   |
| positive regulation of interleukin-8 secretion     | GO:2000484 | 3.00E-02 | 8.71E-02 | 0.0,0.0     | 0.34,0.34   |
| response to dopamine                               | GO:1903350 | 3.00E-02 | 8.71E-02 | 0.0,0.0     | 0.34,0.34   |
| Golgi inheritance                                  | GO:0048313 | 3.00E-02 | 8.71E-02 | 0.0,0.0     | 0.34,0.34   |
| establishment of apical/basal cell polarity        | GO:0035089 | 3.00E-02 | 8.71E-02 | 0.0,0.0     | 0.34,0.34   |
| chondroitin sulfate catabolic process              | GO:0030207 | 3.00E-02 | 8.71E-02 | 0.0,0.0     | 0.34,0.34   |
| regulation of metalloenzyme activity               | GO:0048552 | 3.00E-02 | 8.71E-02 | 0.0,0.0     | 0.34,0.34   |
| natural killer cell proliferation                  | GO:0001787 | 3.00E-02 | 8.71E-02 | 0.0,0.0     | 0.34,0.34   |
| CDP-diacylglycerol biosynthetic process            | GO:0016024 | 3.00E-02 | 8.71E-02 | 0.0,0.0     | 0.34,0.34   |
| response to peptidoglycan                          | GO:0032494 | 3.00E-02 | 8.71E-02 | 0.0,0.0     | 0.34,0.34   |
| regulation of ceramide biosynthetic process        | GO:2000303 | 3.00E-02 | 8.71E-02 | 0.0,0.0     | 0.34,0.34   |
| cellular response to dopamine                      | GO:1903351 | 3.00E-02 | 8.71E-02 | 0.0,0.0     | 0.34,0.34   |
| chemical homeostasis within a tissue               | GO:0048875 | 3.00E-02 | 8.71E-02 | 0.0,0.0     | 0.34,0.34   |
| ferric iron import into cell                       | GO:0097461 | 3.00E-02 | 8.71E-02 | 0.0,0.0     | 0.34,0.34   |
| water-soluble vitamin biosynthetic process         | GO:0042364 | 3.00E-02 | 8.71E-02 | 0.0,0.0     | 0.34,0.34   |
| iron ion import across plasma membrane             | GO:0098711 | 3.00E-02 | 8.71E-02 | 0.0,0.0     | 0.34,0.34   |
| oxoacid metabolic process                          | GO:0043436 | 3.02E-02 | 8.77E-02 | -1.81,-1.82 | -0.34,-0.35 |
| ovulation cycle                                    | GO:0042698 | 3.04E-02 | 8.81E-02 | -0.55,-0.5  | 0.13,0.15   |
| cognition                                          | GO:0050890 | 3.05E-02 | 8.81E-02 | -0.6,-0.49  | 0.12,0.15   |
| regulation of cysteine-type endopeptidase activity | GO:2000116 | 3.05E-02 | 8.81E-02 | -0.19,-0.14 | 0.27,0.28   |
| cellular protein complex assembly                  | GO:0043623 | 3.07E-02 | 8.88E-02 | -1.13,-1.05 | -0.08,-0.06 |
| interleukin-6 production                           | GO:0032635 | 3.08E-02 | 8.91E-02 | -0.44,-0.34 | 0.17,0.21   |
| lymphocyte proliferation                           | GO:0046651 | 3.12E-02 | 9.00E-02 | -0.13,-0.13 | 0.29,0.29   |
| mononuclear cell proliferation                     | GO:0032943 | 3.17E-02 | 9.02E-02 | -0.13,-0.13 | 0.29,0.29   |
| nucleoside monophosphate metabolic process         | GO:0009123 | 3.19E-02 | 9.02E-02 | -0.14,-0.17 | 0.29,0.27   |
| regulation of protein targeting                    | GO:1903533 | 3.20E-02 | 9.02E-02 | -1.15,-1.09 | -0.09,-0.08 |



|                                                                      |            |          |          |             |             |
|----------------------------------------------------------------------|------------|----------|----------|-------------|-------------|
| negative regulation of focal adhesion assembly                       | GO:0051895 | 3.21E-02 | 9.02E-02 | 0.0,0.0     | 0.34,0.34   |
| pentose catabolic process                                            | GO:0019323 | 3.21E-02 | 9.02E-02 | 0.0,0.0     | 0.34,0.34   |
| positive regulation of phosphoprotein phosphatase activity           | GO:0032516 | 3.21E-02 | 9.02E-02 | 0.0,0.0     | 0.34,0.34   |
| purine deoxyribonucleotide metabolic process                         | GO:0009151 | 3.21E-02 | 9.02E-02 | 0.0,0.0     | 0.34,0.34   |
| arginine catabolic process                                           | GO:0006527 | 3.21E-02 | 9.02E-02 | 0.0,0.0     | 0.34,0.34   |
| macrophage cytokine production                                       | GO:0010934 | 3.21E-02 | 9.02E-02 | 0.0,0.0     | 0.34,0.34   |
| positive regulation of exosomal secretion                            | GO:1903543 | 3.21E-02 | 9.02E-02 | 0.0,0.0     | 0.34,0.34   |
| phosphatidylethanolamine biosynthetic process                        | GO:0006646 | 3.21E-02 | 9.02E-02 | 0.0,0.0     | 0.34,0.34   |
| negative regulation of bone resorption                               | GO:0045779 | 3.21E-02 | 9.02E-02 | 0.0,0.0     | 0.34,0.34   |
| deoxyribonucleoside diphosphate metabolic process                    | GO:0009186 | 3.21E-02 | 9.02E-02 | 0.0,0.0     | 0.34,0.34   |
| polarized epithelial cell differentiation                            | GO:0030859 | 3.21E-02 | 9.02E-02 | 0.0,0.0     | 0.34,0.34   |
| regulation of inositol phosphate biosynthetic process                | GO:0010919 | 3.21E-02 | 9.02E-02 | 0.0,0.0     | 0.34,0.34   |
| histone mRNA catabolic process                                       | GO:0071044 | 3.21E-02 | 9.02E-02 | 0.0,0.0     | 0.34,0.34   |
| toxin metabolic process                                              | GO:0009404 | 3.21E-02 | 9.02E-02 | 0.0,0.0     | 0.34,0.34   |
| nucleobase-containing small molecule catabolic process               | GO:0034656 | 3.21E-02 | 9.02E-02 | 0.0,0.0     | 0.34,0.34   |
| negative regulation of multicellular organism growth                 | GO:0040015 | 3.21E-02 | 9.02E-02 | 0.0,0.0     | 0.34,0.34   |
| response to yeast                                                    | GO:0001878 | 3.21E-02 | 9.02E-02 | 0.0,0.0     | 0.34,0.34   |
| ferric iron import                                                   | GO:0033216 | 3.21E-02 | 9.02E-02 | 0.0,0.0     | 0.34,0.34   |
| positive regulation of sodium ion transmembrane transporter activity | GO:2000651 | 3.21E-02 | 9.02E-02 | 0.0,0.0     | 0.34,0.34   |
| I-kappaB phosphorylation                                             | GO:0007252 | 3.21E-02 | 9.02E-02 | 0.0,0.0     | 0.34,0.34   |
| regulation of ER to Golgi vesicle-mediated transport                 | GO:0060628 | 3.21E-02 | 9.02E-02 | 0.0,0.0     | 0.34,0.34   |
| CDP-diacylglycerol metabolic process                                 | GO:0046341 | 3.21E-02 | 9.02E-02 | 0.0,0.0     | 0.34,0.34   |
| regulation of catalytic activity                                     | GO:0050790 | 3.22E-02 | 9.05E-02 | -3.08,-3.18 | -0.81,-0.86 |
| endomembrane system organization                                     | GO:0010256 | 3.23E-02 | 9.06E-02 | -1.02,-1.25 | -0.04,-0.14 |
| granulocyte migration                                                | GO:0097530 | 3.27E-02 | 9.16E-02 | -0.24,-0.13 | 0.25,0.28   |
| chemical homeostasis                                                 | GO:0048878 | 3.28E-02 | 9.18E-02 | -0.75,-0.69 | 0.06,0.08   |

|                                                                      |            |          |          |             |             |
|----------------------------------------------------------------------|------------|----------|----------|-------------|-------------|
| regulation of protein metabolic process                              | GO:0051246 | 3.28E-02 | 9.18E-02 | -2.93,-3.01 | -0.76,-0.8  |
| positive regulation of endocytosis                                   | GO:0045807 | 3.36E-02 | 9.33E-02 | -0.51,-0.59 | 0.15,0.11   |
| regulation of establishment of protein localization to mitochondrion | GO:1903747 | 3.36E-02 | 9.33E-02 | -0.94,-0.95 | -0.01,-0.02 |
| negative regulation of cell differentiation                          | GO:0045596 | 3.36E-02 | 9.33E-02 | -1.18,-1.2  | -0.1,-0.12  |
| positive regulation of protein metabolic process                     | GO:0051247 | 3.36E-02 | 9.33E-02 | -1.85,-1.91 | -0.35,-0.38 |
| sex differentiation                                                  | GO:0007548 | 3.38E-02 | 9.33E-02 | -0.7,-0.69  | 0.08,0.07   |
| epidermal growth factor receptor signaling pathway                   | GO:0007173 | 3.38E-02 | 9.33E-02 | -0.19,-0.14 | 0.27,0.28   |
| regulation of type I interferon production                           | GO:0032479 | 3.40E-02 | 9.33E-02 | -0.38,-0.35 | 0.2,0.2     |
| response to laminar fluid shear stress                               | GO:0034616 | 3.42E-02 | 9.33E-02 | 0.0,0.0     | 0.34,0.34   |
| trachea morphogenesis                                                | GO:0060439 | 3.42E-02 | 9.33E-02 | 0.0,0.0     | 0.34,0.34   |
| negative regulation of phagocytosis                                  | GO:0050765 | 3.42E-02 | 9.33E-02 | 0.0,0.0     | 0.34,0.34   |
| regulation of cytokine secretion involved in immune response         | GO:0002739 | 3.42E-02 | 9.33E-02 | 0.0,0.0     | 0.34,0.34   |
| regulation of amyloid precursor protein catabolic process            | GO:1902991 | 3.42E-02 | 9.33E-02 | 0.0,0.0     | 0.34,0.34   |
| negative regulation of adherens junction organization                | GO:1903392 | 3.42E-02 | 9.33E-02 | 0.0,0.0     | 0.34,0.34   |
| neuromuscular process controlling posture                            | GO:0050884 | 3.42E-02 | 9.33E-02 | 0.0,0.0     | 0.34,0.34   |
| positive regulation of vacuolar transport                            | GO:1903337 | 3.42E-02 | 9.33E-02 | 0.0,0.0     | 0.34,0.34   |
| bone mineralization involved in bone maturation                      | GO:0035630 | 3.42E-02 | 9.33E-02 | 0.0,0.0     | 0.34,0.34   |
| histone H3-K9 demethylation                                          | GO:0033169 | 3.42E-02 | 9.33E-02 | 0.0,0.0     | 0.34,0.34   |
| positive regulation of oligodendrocyte differentiation               | GO:0048714 | 3.42E-02 | 9.33E-02 | 0.0,0.0     | 0.34,0.34   |
| detection of molecule of bacterial origin                            | GO:0032490 | 3.42E-02 | 9.33E-02 | 0.0,0.0     | 0.34,0.34   |
| regulation of podosome assembly                                      | GO:0071801 | 3.42E-02 | 9.33E-02 | 0.0,0.0     | 0.34,0.34   |
| induction of positive chemotaxis                                     | GO:0050930 | 3.42E-02 | 9.33E-02 | 0.0,0.0     | 0.34,0.34   |
| regulation of megakaryocyte differentiation                          | GO:0045652 | 3.42E-02 | 9.33E-02 | 0.0,0.0     | 0.34,0.34   |

|                                                                   |            |          |          |             |             |
|-------------------------------------------------------------------|------------|----------|----------|-------------|-------------|
| establishment of monopolar cell polarity                          | GO:0061162 | 3.42E-02 | 9.33E-02 | 0.0,0.0     | 0.34,0.34   |
| signal complex assembly                                           | GO:0007172 | 3.42E-02 | 9.33E-02 | 0.0,0.0     | 0.34,0.34   |
| diacylglycerol metabolic process                                  | GO:0046339 | 3.42E-02 | 9.33E-02 | 0.0,0.0     | 0.34,0.34   |
| purine ribonucleoside metabolic process                           | GO:0046128 | 3.43E-02 | 9.36E-02 | -0.94,-0.98 | -0.01,-0.03 |
| positive regulation of angiogenesis                               | GO:0045766 | 3.45E-02 | 9.39E-02 | -0.12,-0.02 | 0.29,0.33   |
| regulation of myeloid leukocyte differentiation                   | GO:0002761 | 3.45E-02 | 9.39E-02 | -0.38,-0.35 | 0.2,0.21    |
| collagen metabolic process                                        | GO:0032963 | 3.45E-02 | 9.39E-02 | -0.6,-0.58  | 0.12,0.12   |
| regulation of neuron death                                        | GO:1901214 | 3.46E-02 | 9.39E-02 | -0.75,-0.66 | 0.06,0.09   |
| purine nucleoside metabolic process                               | GO:0042278 | 3.49E-02 | 9.47E-02 | -0.94,-0.98 | -0.01,-0.03 |
| platelet degranulation                                            | GO:0002576 | 3.50E-02 | 9.49E-02 | -0.54,-0.51 | 0.14,0.14   |
| behavior                                                          | GO:0007610 | 3.51E-02 | 9.51E-02 | -0.76,-0.73 | 0.05,0.06   |
| T cell activation                                                 | GO:0042110 | 3.54E-02 | 9.57E-02 | 0.25,0.25   | 0.43,0.43   |
| type I interferon production                                      | GO:0032606 | 3.55E-02 | 9.57E-02 | -0.38,-0.35 | 0.2,0.2     |
| purine ribonucleoside monophosphate biosynthetic process          | GO:0009168 | 3.55E-02 | 9.57E-02 | -0.4,-0.39  | 0.19,0.19   |
| purine nucleoside monophosphate biosynthetic process              | GO:0009127 | 3.55E-02 | 9.57E-02 | -0.4,-0.39  | 0.19,0.19   |
| leukocyte proliferation                                           | GO:0070661 | 3.56E-02 | 9.59E-02 | -0.13,-0.13 | 0.29,0.29   |
| positive regulation of protein localization to nucleus            | GO:1900182 | 3.59E-02 | 9.59E-02 | 0.02,0.01   | 0.35,0.34   |
| female sex differentiation                                        | GO:0046660 | 3.59E-02 | 9.59E-02 | -0.55,-0.5  | 0.13,0.15   |
| hormone-mediated signaling pathway                                | GO:0009755 | 3.62E-02 | 9.59E-02 | 0.27,0.24   | 0.44,0.43   |
| nucleobase-containing small molecule metabolic process            | GO:0055086 | 3.63E-02 | 9.59E-02 | -0.73,-0.73 | 0.07,0.06   |
| positive regulation of nitric-oxide synthase biosynthetic process | GO:0051770 | 3.63E-02 | 9.59E-02 | 0.0,0.0     | 0.34,0.34   |
| positive regulation of endothelial cell apoptotic process         | GO:2000353 | 3.63E-02 | 9.59E-02 | 0.0,0.0     | 0.34,0.34   |
| amyloid-beta formation                                            | GO:0034205 | 3.63E-02 | 9.59E-02 | 0.0,0.0     | 0.34,0.34   |
| IMP salvage                                                       | GO:0032264 | 3.63E-02 | 9.59E-02 | 0.0,0.0     | 0.34,0.34   |
| osteoclast development                                            | GO:0036035 | 3.63E-02 | 9.59E-02 | 0.0,0.0     | 0.34,0.34   |
| central nervous system myelination                                | GO:0022010 | 3.63E-02 | 9.59E-02 | 0.0,0.0     | 0.34,0.34   |
| regulation of proton transport                                    | GO:0010155 | 3.63E-02 | 9.59E-02 | 0.0,0.0     | 0.34,0.34   |
| positive regulation of macrophage chemotaxis                      | GO:0010759 | 3.63E-02 | 9.59E-02 | 0.0,0.0     | 0.34,0.34   |
| copper ion import                                                 | GO:0015677 | 3.63E-02 | 9.59E-02 | 0.0,0.0     | 0.34,0.34   |

|                                                                  |            |          |          |             |             |
|------------------------------------------------------------------|------------|----------|----------|-------------|-------------|
| positive regulation of actin nucleation                          | GO:0051127 | 3.63E-02 | 9.59E-02 | 0.0,0.0     | 0.34,0.34   |
| positive regulation of telomere capping                          | GO:1904355 | 3.63E-02 | 9.59E-02 | 0.0,0.0     | 0.34,0.34   |
| negative regulation of anoikis                                   | GO:2000811 | 3.63E-02 | 9.59E-02 | 0.0,0.0     | 0.34,0.34   |
| sphingomyelin metabolic process                                  | GO:0006684 | 3.63E-02 | 9.59E-02 | 0.0,0.0     | 0.34,0.34   |
| negative regulation of bone remodeling                           | GO:0046851 | 3.63E-02 | 9.59E-02 | 0.0,0.0     | 0.34,0.34   |
| axon ensheathment in central nervous system                      | GO:0032291 | 3.63E-02 | 9.59E-02 | 0.0,0.0     | 0.34,0.34   |
| angiotensin-activated signaling pathway                          | GO:0038166 | 3.63E-02 | 9.59E-02 | 0.0,0.0     | 0.34,0.34   |
| establishment or maintenance of monopolar cell polarity          | GO:0061339 | 3.63E-02 | 9.59E-02 | 0.0,0.0     | 0.34,0.34   |
| positive regulation of lipid metabolic process                   | GO:0045834 | 3.64E-02 | 9.62E-02 | 0.07,0.09   | 0.36,0.37   |
| cellular component morphogenesis                                 | GO:0032989 | 3.66E-02 | 9.65E-02 | -2.43,-2.7  | -0.57,-0.68 |
| circulatory system development                                   | GO:0072359 | 3.69E-02 | 9.70E-02 | -0.13,-0.03 | 0.29,0.32   |
| nucleotide catabolic process                                     | GO:0009166 | 3.69E-02 | 9.70E-02 | -0.38,-0.35 | 0.2,0.21    |
| apoptotic mitochondrial changes                                  | GO:0008637 | 3.69E-02 | 9.70E-02 | -0.09,-0.19 | 0.3,0.27    |
| regulation of protein modification process                       | GO:0031399 | 3.69E-02 | 9.70E-02 | -1.86,-2.03 | -0.36,-0.43 |
| ear morphogenesis                                                | GO:0042471 | 3.74E-02 | 9.80E-02 | -0.22,-0.21 | 0.26,0.26   |
| alpha-beta T cell activation                                     | GO:0046631 | 3.74E-02 | 9.80E-02 | -0.57,-0.52 | 0.13,0.14   |
| multicellular organismal macromolecule metabolic process         | GO:0044259 | 3.74E-02 | 9.80E-02 | -0.6,-0.58  | 0.12,0.12   |
| leukocyte cell-cell adhesion                                     | GO:0007159 | 3.78E-02 | 9.85E-02 | 0.25,0.25   | 0.43,0.43   |
| positive regulation of intracellular signal transduction         | GO:1902533 | 3.78E-02 | 9.85E-02 | -0.02,0.01  | 0.33,0.34   |
| response to hydrogen peroxide                                    | GO:0042542 | 3.79E-02 | 9.85E-02 | 0.58,0.57   | 0.56,0.55   |
| intracellular signal transduction                                | GO:0035556 | 3.79E-02 | 9.85E-02 | -5.86,-5.89 | -1.85,-1.88 |
| positive regulation of chemotaxis                                | GO:0050921 | 3.84E-02 | 9.85E-02 | -0.24,-0.13 | 0.25,0.28   |
| deadenylation-dependent decapping of nuclear-transcribed mRNA    | GO:0000290 | 3.84E-02 | 9.85E-02 | 0.0,0.0     | 0.34,0.34   |
| negative regulation of release of cytochrome c from mitochondria | GO:0090201 | 3.84E-02 | 9.85E-02 | 0.0,0.0     | 0.34,0.34   |

|                                                                                    |            |          |          |             |             |
|------------------------------------------------------------------------------------|------------|----------|----------|-------------|-------------|
| mammary gland<br>epithelial cell<br>differentiation                                | GO:0060644 | 3.84E-02 | 9.85E-02 | 0.0,0.0     | 0.34,0.34   |
| folic acid metabolic<br>process                                                    | GO:0046655 | 3.84E-02 | 9.85E-02 | 0.0,0.0     | 0.34,0.34   |
| regulation of exosomal<br>secretion                                                | GO:1903541 | 3.84E-02 | 9.85E-02 | 0.0,0.0     | 0.34,0.34   |
| regulation of inclusion<br>body assembly                                           | GO:0090083 | 3.84E-02 | 9.85E-02 | 0.0,0.0     | 0.34,0.34   |
| positive regulation of<br>nitric-oxide synthase<br>activity                        | GO:0051000 | 3.84E-02 | 9.85E-02 | 0.0,0.0     | 0.34,0.34   |
| Golgi vesicle budding                                                              | GO:0048194 | 3.84E-02 | 9.85E-02 | 0.0,0.0     | 0.34,0.34   |
| regulation of<br>immunoglobulin<br>secretion                                       | GO:0051023 | 3.84E-02 | 9.85E-02 | 0.0,0.0     | 0.34,0.34   |
| GDP metabolic process                                                              | GO:0046710 | 3.84E-02 | 9.85E-02 | 0.0,0.0     | 0.34,0.34   |
| regulation of telomerase<br>RNA localization to Cajal<br>body                      | GO:1904872 | 3.84E-02 | 9.85E-02 | 0.0,0.0     | 0.34,0.34   |
| lamellipodium<br>morphogenesis                                                     | GO:0072673 | 3.84E-02 | 9.85E-02 | 0.0,0.0     | 0.34,0.34   |
| phosphatidylethanolamin<br>e metabolic process                                     | GO:0046337 | 3.84E-02 | 9.85E-02 | 0.0,0.0     | 0.34,0.34   |
| regulation of<br>sphingolipid biosynthetic<br>process                              | GO:0090153 | 3.84E-02 | 9.85E-02 | 0.0,0.0     | 0.34,0.34   |
| histone H3-K9<br>trimethylation                                                    | GO:0036124 | 3.84E-02 | 9.85E-02 | 0.0,0.0     | 0.34,0.34   |
| regulation of membrane<br>lipid metabolic process                                  | GO:1905038 | 3.84E-02 | 9.85E-02 | 0.0,0.0     | 0.34,0.34   |
| negative regulation of<br>interleukin-12 production                                | GO:0032695 | 3.84E-02 | 9.85E-02 | 0.0,0.0     | 0.34,0.34   |
| positive regulation of<br>nervous system<br>development                            | GO:0051962 | 3.84E-02 | 9.86E-02 | -0.66,-0.65 | 0.09,0.09   |
| innate immune response<br>activating cell surface<br>receptor signaling<br>pathway | GO:0002220 | 3.88E-02 | 9.93E-02 | 0.02,0.01   | 0.35,0.34   |
| negative regulation of<br>DNA metabolic process                                    | GO:0051053 | 3.88E-02 | 9.93E-02 | -0.04,0.06  | 0.32,0.36   |
| gland morphogenesis                                                                | GO:0022612 | 3.88E-02 | 9.93E-02 | 0.04,0.06   | 0.35,0.36   |
| monocarboxylic acid<br>catabolic process                                           | GO:0072329 | 3.88E-02 | 9.93E-02 | -0.27,-0.31 | 0.24,0.22   |
| aging                                                                              | GO:0007568 | 3.92E-02 | 1.00E-01 | -1.03,-0.95 | -0.05,-0.02 |
| actin cytoskeleton<br>reorganization                                               | GO:0031532 | 3.93E-02 | 1.00E-01 | -0.4,-0.61  | 0.19,0.11   |
| mucopolysaccharide<br>metabolic process                                            | GO:1903510 | 3.93E-02 | 1.00E-01 | -0.29,-0.34 | 0.23,0.21   |
| positive regulation of<br>phosphorus metabolic<br>process                          | GO:0010562 | 3.95E-02 | 1.00E-01 | -0.67,-0.63 | 0.09,0.1    |

|                                                                     |            |          |          |             |             |
|---------------------------------------------------------------------|------------|----------|----------|-------------|-------------|
| positive regulation of phosphate metabolic process                  | GO:0045937 | 3.95E-02 | 1.00E-01 | -0.67,-0.63 | 0.09,0.1    |
| negative regulation of signal transduction                          | GO:0009968 | 3.96E-02 | 1.01E-01 | 4.17,4.06   | 1.9,1.86    |
| cell projection assembly                                            | GO:0030031 | 3.96E-02 | 1.01E-01 | -0.57,-0.38 | 0.12,0.19   |
| negative regulation of cysteine-type endopeptidase activity         | GO:2000117 | 3.98E-02 | 1.01E-01 | 0.09,0.16   | 0.37,0.4    |
| integrin activation                                                 | GO:0033622 | 4.05E-02 | 1.02E-01 | 0.0,0.0     | 0.34,0.34   |
| RNA localization to Cajal body                                      | GO:0090670 | 4.05E-02 | 1.02E-01 | 0.0,0.0     | 0.34,0.34   |
| telomerase RNA localization to Cajal body                           | GO:0090671 | 4.05E-02 | 1.02E-01 | 0.0,0.0     | 0.34,0.34   |
| organelle inheritance                                               | GO:0048308 | 4.05E-02 | 1.02E-01 | 0.0,0.0     | 0.34,0.34   |
| CD8-positive, alpha-beta T cell activation                          | GO:0036037 | 4.05E-02 | 1.02E-01 | 0.0,0.0     | 0.34,0.34   |
| telomerase RNA localization                                         | GO:0090672 | 4.05E-02 | 1.02E-01 | 0.0,0.0     | 0.34,0.34   |
| regulation of interleukin-6 biosynthetic process                    | GO:0045408 | 4.05E-02 | 1.02E-01 | 0.0,0.0     | 0.34,0.34   |
| negative regulation of cell development                             | GO:0010721 | 4.06E-02 | 1.02E-01 | -0.63,-0.67 | 0.1,0.08    |
| nucleoside phosphate catabolic process                              | GO:1901292 | 4.08E-02 | 1.03E-01 | -0.38,-0.35 | 0.2,0.21    |
| protein phosphorylation                                             | GO:0006468 | 4.12E-02 | 1.03E-01 | -4.84,-5.01 | -1.47,-1.55 |
| regulation of protein kinase activity                               | GO:0045859 | 4.12E-02 | 1.03E-01 | -0.19,-0.14 | 0.27,0.28   |
| positive regulation of cell projection organization                 | GO:0031346 | 4.15E-02 | 1.04E-01 | -0.19,-0.14 | 0.27,0.28   |
| intrinsic apoptotic signaling pathway                               | GO:0097193 | 4.15E-02 | 1.04E-01 | -0.19,-0.14 | 0.27,0.28   |
| ribonucleoside metabolic process                                    | GO:0009119 | 4.17E-02 | 1.05E-01 | -0.94,-0.98 | -0.01,-0.03 |
| regulation of protein polymerization                                | GO:0032271 | 4.18E-02 | 1.05E-01 | -0.64,-0.58 | 0.1,0.12    |
| positive regulation of cellular amide metabolic process             | GO:0034250 | 4.18E-02 | 1.05E-01 | -0.39,-0.39 | 0.19,0.19   |
| positive regulation of canonical Wnt signaling pathway              | GO:0090263 | 4.18E-02 | 1.05E-01 | 0.54,0.51   | 0.54,0.53   |
| purine ribonucleotide metabolic process                             | GO:0009150 | 4.21E-02 | 1.05E-01 | -0.53,-0.57 | 0.14,0.12   |
| cellular process involved in reproduction in multicellular organism | GO:0022412 | 4.21E-02 | 1.05E-01 | -0.19,-0.14 | 0.27,0.28   |
| macromolecule catabolic process                                     | GO:0009057 | 4.23E-02 | 1.05E-01 | -1.98,-2.01 | -0.4,-0.42  |
| long-chain fatty acid metabolic process                             | GO:0001676 | 4.23E-02 | 1.05E-01 | -0.27,-0.3  | 0.24,0.22   |
| protein dephosphorylation                                           | GO:0006470 | 4.24E-02 | 1.05E-01 | -0.63,-0.7  | 0.1,0.07    |

|                                                                                 |            |          |          |             |             |
|---------------------------------------------------------------------------------|------------|----------|----------|-------------|-------------|
| regulation of tumor necrosis factor biosynthetic process epithelial cell        | GO:0042534 | 4.25E-02 | 1.05E-01 | 0.0,0.0     | 0.34,0.34   |
| proliferation involved in liver morphogenesis                                   | GO:0072575 | 4.25E-02 | 1.05E-01 | 0.0,0.0     | 0.34,0.34   |
| myelin assembly                                                                 | GO:0032288 | 4.25E-02 | 1.05E-01 | 0.0,0.0     | 0.34,0.34   |
| purine nucleotide salvage                                                       | GO:0032261 | 4.25E-02 | 1.05E-01 | 0.0,0.0     | 0.34,0.34   |
| cellular response to platelet-derived growth factor stimulus                    | GO:0036120 | 4.25E-02 | 1.05E-01 | 0.0,0.0     | 0.34,0.34   |
| hepatocyte proliferation                                                        | GO:0072574 | 4.25E-02 | 1.05E-01 | 0.0,0.0     | 0.34,0.34   |
| negative regulation of cell junction assembly                                   | GO:1901889 | 4.25E-02 | 1.05E-01 | 0.0,0.0     | 0.34,0.34   |
| citrulline metabolic process                                                    | GO:0000052 | 4.25E-02 | 1.05E-01 | 0.0,0.0     | 0.34,0.34   |
| positive regulation of transcription elongation from RNA polymerase II promoter | GO:0032968 | 4.25E-02 | 1.05E-01 | 0.0,0.0     | 0.34,0.34   |
| tumor necrosis factor biosynthetic process                                      | GO:0042533 | 4.25E-02 | 1.05E-01 | 0.0,0.0     | 0.34,0.34   |
| regulation of platelet aggregation                                              | GO:0090330 | 4.25E-02 | 1.05E-01 | 0.0,0.0     | 0.34,0.34   |
| negative regulation of platelet activation                                      | GO:0010544 | 4.25E-02 | 1.05E-01 | 0.0,0.0     | 0.34,0.34   |
| protein oligomerization                                                         | GO:0051259 | 4.28E-02 | 1.05E-01 | -0.89,-0.76 | 0.0,0.05    |
| skeletal system development                                                     | GO:0001501 | 4.28E-02 | 1.05E-01 | -0.82,-0.7  | 0.03,0.07   |
| epithelium development                                                          | GO:0060429 | 4.29E-02 | 1.05E-01 | -0.71,-0.68 | 0.07,0.08   |
| regulation of endopeptidase activity                                            | GO:0052548 | 4.30E-02 | 1.06E-01 | -0.88,-0.84 | 0.01,0.02   |
| cellular protein modification process                                           | GO:0006464 | 4.31E-02 | 1.06E-01 | -7.94,-8.12 | -2.63,-2.72 |
| protein modification process                                                    | GO:0036211 | 4.31E-02 | 1.06E-01 | -7.94,-8.12 | -2.63,-2.72 |
| regulation of exocytosis                                                        | GO:0017157 | 4.33E-02 | 1.06E-01 | -0.65,-0.64 | 0.1,0.1     |
| positive regulation of vasculature development                                  | GO:1904018 | 4.34E-02 | 1.06E-01 | -0.12,-0.02 | 0.29,0.33   |
| positive regulation of lymphocyte proliferation                                 | GO:0050671 | 4.39E-02 | 1.07E-01 | 0.21,0.2    | 0.42,0.41   |
| response to ammonium ion                                                        | GO:0060359 | 4.39E-02 | 1.07E-01 | -0.36,-0.37 | 0.21,0.2    |
| regulation of cellular amide metabolic process                                  | GO:0034248 | 4.41E-02 | 1.07E-01 | -0.7,-0.7   | 0.08,0.07   |
| negative regulation of hydrolase activity                                       | GO:0051346 | 4.41E-02 | 1.07E-01 | -0.82,-0.81 | 0.03,0.03   |
| cellular response to type I interferon                                          | GO:0071357 | 4.44E-02 | 1.07E-01 | -0.55,-0.45 | 0.13,0.17   |
| type I interferon signaling pathway                                             | GO:0060337 | 4.44E-02 | 1.07E-01 | -0.55,-0.45 | 0.13,0.17   |
| positive regulation of mononuclear cell proliferation                           | GO:0032946 | 4.44E-02 | 1.07E-01 | 0.21,0.2    | 0.42,0.41   |

|                                                              |            |          |          |             |             |
|--------------------------------------------------------------|------------|----------|----------|-------------|-------------|
| cellular modified amino acid metabolic process               | GO:0006575 | 4.45E-02 | 1.07E-01 | -0.7,-0.67  | 0.08,0.08   |
| interleukin-6 biosynthetic process                           | GO:0042226 | 4.46E-02 | 1.07E-01 | 0.0,0.0     | 0.34,0.34   |
| PERK-mediated unfolded protein response                      | GO:0036499 | 4.46E-02 | 1.07E-01 | 0.0,0.0     | 0.34,0.34   |
| exosomal secretion                                           | GO:1990182 | 4.46E-02 | 1.07E-01 | 0.0,0.0     | 0.34,0.34   |
| transcytosis                                                 | GO:0045056 | 4.46E-02 | 1.07E-01 | 0.0,0.0     | 0.34,0.34   |
| cellular response to fluid shear stress                      | GO:0071498 | 4.46E-02 | 1.07E-01 | 0.0,0.0     | 0.34,0.34   |
| phosphatidylserine acyl-chain remodeling                     | GO:0036150 | 4.46E-02 | 1.07E-01 | 0.0,0.0     | 0.34,0.34   |
| planar cell polarity pathway involved in neural tube closure | GO:0090179 | 4.46E-02 | 1.07E-01 | 0.0,0.0     | 0.34,0.34   |
| regulation of nitric-oxide synthase biosynthetic process     | GO:0051769 | 4.46E-02 | 1.07E-01 | 0.0,0.0     | 0.34,0.34   |
| peroxisome proliferator activated receptor signaling pathway | GO:0035357 | 4.46E-02 | 1.07E-01 | 0.0,0.0     | 0.34,0.34   |
| positive regulation of sodium ion                            | GO:1902307 | 4.46E-02 | 1.07E-01 | 0.0,0.0     | 0.34,0.34   |
| transmembrane transport                                      |            |          |          |             |             |
| negative regulation of histone methylation                   | GO:0031061 | 4.46E-02 | 1.07E-01 | 0.0,0.0     | 0.34,0.34   |
| microglial cell activation                                   | GO:0001774 | 4.46E-02 | 1.07E-01 | 0.0,0.0     | 0.34,0.34   |
| response to platelet-derived growth factor                   | GO:0036119 | 4.46E-02 | 1.07E-01 | 0.0,0.0     | 0.34,0.34   |
| regulation of protein exit from endoplasmic reticulum        | GO:0070861 | 4.46E-02 | 1.07E-01 | 0.0,0.0     | 0.34,0.34   |
| regulation of transcription involved in cell fate commitment | GO:0060850 | 4.46E-02 | 1.07E-01 | 0.0,0.0     | 0.34,0.34   |
| positive regulation of toll-like receptor signaling pathway  | GO:0034123 | 4.46E-02 | 1.07E-01 | 0.0,0.0     | 0.34,0.34   |
| nitric-oxide synthase biosynthetic process                   | GO:0051767 | 4.46E-02 | 1.07E-01 | 0.0,0.0     | 0.34,0.34   |
| cation homeostasis                                           | GO:0055080 | 4.47E-02 | 1.07E-01 | -1.28,-1.4  | -0.14,-0.19 |
| ribonucleotide metabolic process                             | GO:0009259 | 4.51E-02 | 1.08E-01 | -0.53,-0.57 | 0.14,0.12   |
| carboxylic acid catabolic process                            | GO:0046395 | 4.51E-02 | 1.08E-01 | -0.67,-0.69 | 0.09,0.07   |
| organic acid catabolic process                               | GO:0016054 | 4.51E-02 | 1.08E-01 | -0.67,-0.69 | 0.09,0.07   |
| neuron death                                                 | GO:0070997 | 4.54E-02 | 1.08E-01 | -0.75,-0.66 | 0.06,0.09   |
| icosanoid metabolic process                                  | GO:0006690 | 4.59E-02 | 1.09E-01 | -0.35,-0.3  | 0.21,0.22   |
| regulation of regulated secretory pathway                    | GO:1903305 | 4.59E-02 | 1.09E-01 | -0.39,-0.41 | 0.19,0.18   |



|                                                                                                      |            |          |          |             |             |
|------------------------------------------------------------------------------------------------------|------------|----------|----------|-------------|-------------|
| nucleobase-containing compound catabolic process                                                     | GO:0034655 | 4.63E-02 | 1.09E-01 | -1.12,-1.16 | -0.08,-0.1  |
| response to type I interferon                                                                        | GO:0034340 | 4.65E-02 | 1.09E-01 | -0.55,-0.45 | 0.13,0.17   |
| positive regulation of cell development                                                              | GO:0010720 | 4.66E-02 | 1.09E-01 | -0.66,-0.65 | 0.09,0.09   |
| innate immune response-activating signal transduction                                                | GO:0002758 | 4.66E-02 | 1.09E-01 | -0.19,-0.14 | 0.27,0.28   |
| hydrogen peroxide catabolic process                                                                  | GO:0042744 | 4.67E-02 | 1.09E-01 | 0.0,0.0     | 0.34,0.34   |
| pinocytosis                                                                                          | GO:0006907 | 4.67E-02 | 1.09E-01 | 0.0,0.0     | 0.34,0.34   |
| NLS-bearing protein import into nucleus                                                              | GO:0006607 | 4.67E-02 | 1.09E-01 | 0.0,0.0     | 0.34,0.34   |
| beta-catenin destruction complex disassembly                                                         | GO:1904886 | 4.67E-02 | 1.09E-01 | 0.0,0.0     | 0.34,0.34   |
| response to acidic pH regulation of establishment of planar polarity involved in neural tube closure | GO:0090178 | 4.67E-02 | 1.09E-01 | 0.0,0.0     | 0.34,0.34   |
| sphingosine-1-phosphate signaling pathway                                                            | GO:0003376 | 4.67E-02 | 1.09E-01 | 0.0,0.0     | 0.34,0.34   |
| liver morphogenesis                                                                                  | GO:0072576 | 4.67E-02 | 1.09E-01 | 0.0,0.0     | 0.34,0.34   |
| immunoglobulin secretion                                                                             | GO:0048305 | 4.67E-02 | 1.09E-01 | 0.0,0.0     | 0.34,0.34   |
| positive regulation of protein processing                                                            | GO:0010954 | 4.67E-02 | 1.09E-01 | 0.0,0.0     | 0.34,0.34   |
| interferon-gamma secretion                                                                           | GO:0072643 | 4.67E-02 | 1.09E-01 | 0.0,0.0     | 0.34,0.34   |
| iron ion import into cell                                                                            | GO:0097459 | 4.67E-02 | 1.09E-01 | 0.0,0.0     | 0.34,0.34   |
| cobalamin metabolic process                                                                          | GO:0009235 | 4.67E-02 | 1.09E-01 | 0.0,0.0     | 0.34,0.34   |
| cellular response to angiotensin                                                                     | GO:1904385 | 4.67E-02 | 1.09E-01 | 0.0,0.0     | 0.34,0.34   |
| muscle hypertrophy in response to stress cardiac muscle                                              | GO:0003299 | 4.67E-02 | 1.09E-01 | 0.0,0.0     | 0.34,0.34   |
| hypertrophy in response to stress                                                                    | GO:0014898 | 4.67E-02 | 1.09E-01 | 0.0,0.0     | 0.34,0.34   |
| protein processing                                                                                   | GO:0016485 | 4.68E-02 | 1.09E-01 | 2.1,2.15    | 1.12,1.15   |
| macroautophagy                                                                                       | GO:0016236 | 4.70E-02 | 1.10E-01 | -0.73,-0.65 | 0.07,0.09   |
| positive regulation of leukocyte proliferation                                                       | GO:0070665 | 4.75E-02 | 1.11E-01 | 0.21,0.2    | 0.42,0.41   |
| ribonucleoside monophosphate biosynthetic process                                                    | GO:0009156 | 4.75E-02 | 1.11E-01 | -0.4,-0.39  | 0.19,0.19   |
| response to metal ion                                                                                | GO:0010038 | 4.76E-02 | 1.11E-01 | -0.39,-0.44 | 0.19,0.17   |
| single organism reproductive process                                                                 | GO:0044702 | 4.79E-02 | 1.11E-01 | -1.54,-1.39 | -0.24,-0.19 |
| intracellular steroid hormone receptor signaling pathway                                             | GO:0030518 | 4.81E-02 | 1.12E-01 | 2.59,2.52   | 1.31,1.29   |

|                                                                  |            |          |          |             |             |
|------------------------------------------------------------------|------------|----------|----------|-------------|-------------|
| negative regulation of cellular protein metabolic process        | GO:0032269 | 4.85E-02 | 1.12E-01 | -1.23,-1.23 | -0.12,-0.13 |
| integrin-mediated signaling pathway                              | GO:0007229 | 4.86E-02 | 1.12E-01 | 0.16,0.2    | 0.4,0.41    |
| mammary gland development                                        | GO:0030879 | 4.86E-02 | 1.12E-01 | 0.04,0.06   | 0.35,0.36   |
| multicellular organism metabolic process                         | GO:0044236 | 4.86E-02 | 1.12E-01 | -0.6,-0.58  | 0.12,0.12   |
| positive regulation of protein maturation                        | GO:1903319 | 4.88E-02 | 1.12E-01 | 0.0,0.0     | 0.34,0.34   |
| regulation of macrophage chemotaxis                              | GO:0010758 | 4.88E-02 | 1.12E-01 | 0.0,0.0     | 0.34,0.34   |
| ossification involved in bone maturation                         | GO:0043931 | 4.88E-02 | 1.12E-01 | 0.0,0.0     | 0.34,0.34   |
| regulation of mitochondrial depolarization                       | GO:0051900 | 4.88E-02 | 1.12E-01 | 0.0,0.0     | 0.34,0.34   |
| establishment of planar polarity involved in neural tube closure | GO:0090177 | 4.88E-02 | 1.12E-01 | 0.0,0.0     | 0.34,0.34   |
| regulation of mononuclear cell migration                         | GO:0071675 | 4.88E-02 | 1.12E-01 | 0.0,0.0     | 0.34,0.34   |
| muscle cell cellular homeostasis                                 | GO:0046716 | 4.88E-02 | 1.12E-01 | 0.0,0.0     | 0.34,0.34   |
| negative regulation of tissue remodeling                         | GO:0034104 | 4.88E-02 | 1.12E-01 | 0.0,0.0     | 0.34,0.34   |
| regulation of telomere capping                                   | GO:1904353 | 4.88E-02 | 1.12E-01 | 0.0,0.0     | 0.34,0.34   |
| positive regulation of natural killer cell activation            | GO:0032816 | 4.88E-02 | 1.12E-01 | 0.0,0.0     | 0.34,0.34   |
| inositol phosphate biosynthetic process                          | GO:0032958 | 4.88E-02 | 1.12E-01 | 0.0,0.0     | 0.34,0.34   |
| regulation of interleukin-8 secretion                            | GO:2000482 | 4.88E-02 | 1.12E-01 | 0.0,0.0     | 0.34,0.34   |
| cardiac muscle adaptation                                        | GO:0014887 | 4.88E-02 | 1.12E-01 | 0.0,0.0     | 0.34,0.34   |
| labyrinthine layer blood vessel development                      | GO:0060716 | 4.88E-02 | 1.12E-01 | 0.0,0.0     | 0.34,0.34   |
| response to hypoxia                                              | GO:0001666 | 4.88E-02 | 1.12E-01 | -0.19,-0.14 | 0.27,0.28   |
| activation of innate immune response                             | GO:0002218 | 4.88E-02 | 1.12E-01 | -0.19,-0.14 | 0.27,0.28   |
| cellular transition metal ion homeostasis                        | GO:0046916 | 4.91E-02 | 1.12E-01 | -0.23,-0.24 | 0.25,0.25   |
| purine nucleotide metabolic process                              | GO:0006163 | 4.93E-02 | 1.12E-01 | -0.53,-0.57 | 0.14,0.12   |
| hormone secretion                                                | GO:0046879 | 4.94E-02 | 1.13E-01 | -1.3,-1.36  | -0.15,-0.18 |
| regulation of mitochondrion organization                         | GO:0010821 | 4.98E-02 | 1.13E-01 | -0.39,-0.44 | 0.19,0.17   |
| cell projection organization                                     | GO:0030030 | 4.98E-02 | 1.13E-01 | -2.07,-2.42 | -0.44,-0.57 |

**Table S3.** All Enriched Cell component.

| GO_Name                                    | GO_ID      | Pvalue   | Pvalue_adjusted |
|--------------------------------------------|------------|----------|-----------------|
| secretory vesicle                          | GO:0099503 | 7.25E-13 | 1.86E-10        |
| secretory granule                          | GO:0030141 | 1.06E-12 | 1.86E-10        |
| cytoplasm                                  | GO:0005737 | 1.42E-11 | 1.64E-09        |
| intracellular vesicle                      | GO:0097708 | 1.87E-11 | 1.64E-09        |
| cytoplasmic vesicle                        | GO:0031410 | 7.34E-11 | 5.17E-09        |
| cytoplasmic part                           | GO:0044444 | 2.52E-10 | 1.48E-08        |
| membrane-bounded vesicle                   | GO:0031988 | 4.36E-10 | 2.08E-08        |
| endomembrane system                        | GO:0012505 | 4.73E-10 | 2.08E-08        |
| lysosome                                   | GO:0005764 | 8.08E-10 | 3.16E-08        |
| lytic vacuole                              | GO:0000323 | 9.16E-10 | 3.22E-08        |
| primary lysosome                           | GO:0005766 | 2.54E-09 | 7.46E-08        |
| azurophil granule                          | GO:0042582 | 2.54E-09 | 7.46E-08        |
| vesicle                                    | GO:0031982 | 4.01E-09 | 1.09E-07        |
| cytoplasmic, membrane-bounded vesicle      | GO:0016023 | 5.48E-09 | 1.38E-07        |
| vacuole                                    | GO:0005773 | 1.65E-08 | 3.87E-07        |
| cytoplasmic vesicle part                   | GO:0044433 | 2.69E-08 | 5.92E-07        |
| extracellular membrane-bounded organelle   | GO:0065010 | 2.88E-08 | 5.96E-07        |
| extracellular organelle                    | GO:0043230 | 3.77E-08 | 7.37E-07        |
| secretory granule lumen                    | GO:0034774 | 4.36E-08 | 8.09E-07        |
| azurophil granule lumen                    | GO:0035578 | 5.46E-08 | 9.62E-07        |
| cytoplasmic membrane-bounded vesicle lumen | GO:0060205 | 6.61E-08 | 1.09E-06        |
| vesicle lumen                              | GO:0031983 | 6.78E-08 | 1.09E-06        |
| vacuolar part                              | GO:0044437 | 8.82E-08 | 1.35E-06        |
| vacuolar lumen                             | GO:0005775 | 1.14E-07 | 1.67E-06        |
| extracellular region part                  | GO:0044421 | 1.42E-07 | 2.00E-06        |
| extracellular exosome                      | GO:0070062 | 1.55E-07 | 2.11E-06        |
| extracellular vesicle                      | GO:1903561 | 1.71E-07 | 2.22E-06        |
| intracellular organelle part               | GO:0044446 | 2.33E-07 | 2.93E-06        |
| extracellular region                       | GO:0005576 | 5.45E-07 | 6.43E-06        |
| organelle part                             | GO:0044422 | 5.48E-07 | 6.43E-06        |
| membrane-bounded organelle                 | GO:0043227 | 6.38E-07 | 7.25E-06        |
| organelle                                  | GO:0043226 | 9.59E-07 | 1.06E-05        |
| cytosol                                    | GO:0005829 | 9.28E-06 | 9.90E-05        |
| secretory granule membrane                 | GO:0030667 | 9.78E-06 | 1.01E-04        |
| intracellular organelle                    | GO:0043229 | 2.10E-05 | 2.11E-04        |
| intracellular membrane-bounded organelle   | GO:0043231 | 2.55E-05 | 2.50E-04        |
| intracellular part                         | GO:0044424 | 2.90E-05 | 2.76E-04        |
| organelle lumen                            | GO:0043233 | 3.00E-05 | 2.78E-04        |
| membrane-enclosed lumen                    | GO:0031974 | 3.22E-05 | 2.91E-04        |
| nuclear envelope                           | GO:0005635 | 4.66E-05 | 4.10E-04        |
| intracellular organelle lumen              | GO:0070013 | 5.24E-05 | 4.50E-04        |
| organelle membrane                         | GO:0031090 | 8.20E-05 | 6.73E-04        |
| bounding membrane of organelle             | GO:0098588 | 8.22E-05 | 6.73E-04        |
| intracellular                              | GO:0005622 | 8.94E-05 | 7.15E-04        |
| focal adhesion                             | GO:0005925 | 1.04E-04 | 8.11E-04        |
| cell-substrate adherens junction           | GO:0005924 | 1.12E-04 | 8.56E-04        |
| cell-substrate junction                    | GO:0030055 | 1.21E-04 | 9.03E-04        |
| nuclear envelope lumen                     | GO:0005641 | 1.35E-04 | 9.93E-04        |
| endosome                                   | GO:0005768 | 2.91E-04 | 2.09E-03        |

|                                                           |            |          |          |
|-----------------------------------------------------------|------------|----------|----------|
| lytic vacuole membrane                                    | GO:0098852 | 3.04E-04 | 2.14E-03 |
| ficolin-1-rich granule membrane                           | GO:0101003 | 3.48E-04 | 2.40E-03 |
| secondary lysosome                                        | GO:0005767 | 4.36E-04 | 2.95E-03 |
| lysosomal membrane                                        | GO:0005765 | 4.48E-04 | 2.98E-03 |
| late endosome                                             | GO:0005770 | 4.57E-04 | 2.98E-03 |
| actomyosin                                                | GO:0042641 | 6.13E-04 | 3.92E-03 |
| phagocytic vesicle                                        | GO:0045335 | 6.44E-04 | 4.01E-03 |
| trans-Golgi network                                       | GO:0005802 | 6.77E-04 | 4.08E-03 |
| membrane microdomain                                      | GO:0098857 | 6.87E-04 | 4.08E-03 |
| adherens junction                                         | GO:0005912 | 6.95E-04 | 4.08E-03 |
| anchoring junction                                        | GO:0070161 | 8.77E-04 | 5.06E-03 |
| caveola                                                   | GO:0005901 | 9.18E-04 | 5.21E-03 |
| whole membrane                                            | GO:0098805 | 1.12E-03 | 6.24E-03 |
| mitochondrion                                             | GO:0005739 | 1.41E-03 | 7.74E-03 |
| plasma membrane raft                                      | GO:0044853 | 1.47E-03 | 7.95E-03 |
| cell surface                                              | GO:0009986 | 1.55E-03 | 8.25E-03 |
| cell part                                                 | GO:0044464 | 1.62E-03 | 8.45E-03 |
| extracellular space                                       | GO:0005615 | 1.63E-03 | 8.45E-03 |
| organelle envelope                                        | GO:0031967 | 1.67E-03 | 8.50E-03 |
| envelope                                                  | GO:0031975 | 1.70E-03 | 8.53E-03 |
| Golgi cisterna                                            | GO:0031985 | 1.73E-03 | 8.60E-03 |
| vacuolar membrane                                         | GO:0005774 | 1.90E-03 | 9.28E-03 |
| endocytic vesicle                                         | GO:0030139 | 2.01E-03 | 9.67E-03 |
| isoamylase complex                                        | GO:0043033 | 2.22E-03 | 1.04E-02 |
| chaperone-mediated autophagy translocation complex        | GO:0061742 | 2.22E-03 | 1.04E-02 |
| podosome                                                  | GO:0002102 | 2.46E-03 | 1.14E-02 |
| cell                                                      | GO:0005623 | 2.50E-03 | 1.14E-02 |
| ficolin-1-rich granule                                    | GO:0101002 | 2.71E-03 | 1.21E-02 |
| ficolin-1-rich granule lumen                              | GO:1904813 | 2.71E-03 | 1.21E-02 |
| actin cytoskeleton                                        | GO:0015629 | 3.00E-03 | 1.32E-02 |
| organelle subcompartment                                  | GO:0031984 | 3.28E-03 | 1.43E-02 |
| Golgi subcompartment                                      | GO:0098791 | 3.55E-03 | 1.52E-02 |
| phagocytic vesicle membrane                               | GO:0030670 | 3.81E-03 | 1.62E-02 |
| Golgi stack                                               | GO:0005795 | 4.12E-03 | 1.73E-02 |
| Toll-like receptor 2-Toll-like receptor 6 protein complex | GO:0035355 | 4.44E-03 | 1.77E-02 |
| intrinsic component of autophagosome membrane             | GO:0097636 | 4.44E-03 | 1.77E-02 |
| Toll-like receptor 1-Toll-like receptor 2 protein complex | GO:0035354 | 4.44E-03 | 1.77E-02 |
| integral component of autophagosome membrane              | GO:0097637 | 4.44E-03 | 1.77E-02 |
| cytoplasmic vesicle membrane                              | GO:0030659 | 4.60E-03 | 1.82E-02 |
| vesicle membrane                                          | GO:0012506 | 5.16E-03 | 2.02E-02 |
| tertiary granule                                          | GO:0070820 | 5.91E-03 | 2.29E-02 |
| external side of plasma membrane                          | GO:0009897 | 6.18E-03 | 2.37E-02 |
| mitochondrial matrix                                      | GO:0005759 | 6.45E-03 | 2.44E-02 |
| CHOP-C/EBP complex                                        | GO:0036488 | 6.65E-03 | 2.49E-02 |
| membrane raft                                             | GO:0045121 | 7.15E-03 | 2.65E-02 |
| contractile actin filament bundle                         | GO:0097517 | 7.44E-03 | 2.67E-02 |
| microtubule organizing center attachment site             | GO:0034992 | 7.44E-03 | 2.67E-02 |
| LINC complex                                              | GO:0034993 | 7.44E-03 | 2.67E-02 |
| azurophil granule membrane                                | GO:0035577 | 7.69E-03 | 2.73E-02 |

|                                                       |            |          |          |
|-------------------------------------------------------|------------|----------|----------|
| plasma membrane part                                  | GO:0044459 | 8.24E-03 | 2.90E-02 |
| Golgi membrane                                        | GO:0000139 | 8.37E-03 | 2.92E-02 |
| stress fiber                                          | GO:0001725 | 8.46E-03 | 2.92E-02 |
| intrinsic component of vacuolar membrane              | GO:0031310 | 8.85E-03 | 2.97E-02 |
| integral component of vacuolar membrane               | GO:0031166 | 8.85E-03 | 2.97E-02 |
| histone locus body                                    | GO:0035363 | 8.85E-03 | 2.97E-02 |
| Golgi apparatus                                       | GO:0005794 | 9.29E-03 | 3.09E-02 |
| cell periphery                                        | GO:0071944 | 9.44E-03 | 3.11E-02 |
| side of membrane                                      | GO:0098552 | 1.00E-02 | 3.26E-02 |
| integral component of plasma membrane                 | GO:0005887 | 1.07E-02 | 3.42E-02 |
| actin filament bundle                                 | GO:0032432 | 1.07E-02 | 3.42E-02 |
| Golgi apparatus part                                  | GO:0044431 | 1.10E-02 | 3.47E-02 |
| phagolysosome                                         | GO:0032010 | 1.11E-02 | 3.47E-02 |
| platelet dense granule membrane                       | GO:0031088 | 1.33E-02 | 4.09E-02 |
| sperm plasma membrane                                 | GO:0097524 | 1.33E-02 | 4.09E-02 |
| cell junction                                         | GO:0030054 | 1.35E-02 | 4.12E-02 |
| intrinsic component of plasma membrane                | GO:0031226 | 1.43E-02 | 4.34E-02 |
| endosomal part                                        | GO:0044440 | 1.53E-02 | 4.49E-02 |
| multivesicular body lumen                             | GO:0097486 | 1.54E-02 | 4.49E-02 |
| Golgi cis cisterna                                    | GO:0000137 | 1.54E-02 | 4.49E-02 |
| late endosome lumen                                   | GO:0031906 | 1.54E-02 | 4.49E-02 |
| PTW/PP1 phosphatase complex                           | GO:0072357 | 1.54E-02 | 4.49E-02 |
| vacuolar proton-transporting V-type ATPase, V0 domain | GO:0000220 | 1.76E-02 | 5.01E-02 |
| intracellular non-membrane-bounded organelle          | GO:0043232 | 1.77E-02 | 5.01E-02 |
| non-membrane-bounded organelle                        | GO:0043228 | 1.77E-02 | 5.01E-02 |
| lysosomal lumen                                       | GO:0043202 | 1.79E-02 | 5.01E-02 |
| lipid particle                                        | GO:0005811 | 1.79E-02 | 5.01E-02 |
| autolysosome                                          | GO:0044754 | 1.98E-02 | 5.45E-02 |
| alveolar lamellar body                                | GO:0097208 | 1.98E-02 | 5.45E-02 |
| chromosome, centromeric region                        | GO:0000775 | 2.08E-02 | 5.67E-02 |
| organelle envelope lumen                              | GO:0031970 | 2.14E-02 | 5.79E-02 |
| endocytic vesicle membrane                            | GO:0030666 | 2.16E-02 | 5.81E-02 |
| alpha DNA polymerase:primase complex                  | GO:0005658 | 2.20E-02 | 5.86E-02 |
| actin filament                                        | GO:0005884 | 2.30E-02 | 6.08E-02 |
| plasma membrane                                       | GO:0005886 | 2.42E-02 | 6.36E-02 |
| brush border                                          | GO:0005903 | 2.59E-02 | 6.75E-02 |
| nuclear part                                          | GO:0044428 | 2.80E-02 | 7.25E-02 |
| signal peptidase complex                              | GO:0005787 | 2.85E-02 | 7.32E-02 |
| acrosomal vesicle                                     | GO:0001669 | 2.94E-02 | 7.50E-02 |
| NADPH oxidase complex                                 | GO:0043020 | 3.06E-02 | 7.76E-02 |
| mitochondrial part                                    | GO:0044429 | 3.18E-02 | 7.99E-02 |
| nuclear inner membrane                                | GO:0005637 | 3.45E-02 | 8.62E-02 |
| low-density lipoprotein particle                      | GO:0034362 | 3.50E-02 | 8.66E-02 |
| extrinsic component of plasma membrane                | GO:0019897 | 3.63E-02 | 8.94E-02 |
| lamellar body                                         | GO:0042599 | 4.14E-02 | 1.01E-01 |
| RNAi effector complex                                 | GO:0031332 | 4.35E-02 | 1.05E-01 |
| RISC complex                                          | GO:0016442 | 4.35E-02 | 1.05E-01 |
| chromatin                                             | GO:0000785 | 4.38E-02 | 1.05E-01 |
| endosome membrane                                     | GO:0010008 | 4.52E-02 | 1.07E-01 |
| platelet dense granule                                | GO:0042827 | 4.56E-02 | 1.07E-01 |

|                                             |            |          |          |
|---------------------------------------------|------------|----------|----------|
| nucleotide-activated protein kinase complex | GO:0031588 | 4.56E-02 | 1.07E-01 |
| chromosomal part                            | GO:0044427 | 4.69E-02 | 1.09E-01 |
| pericentric heterochromatin                 | GO:0005721 | 4.77E-02 | 1.09E-01 |
| transcriptionally active chromatin          | GO:0035327 | 4.77E-02 | 1.09E-01 |
| Z disc                                      | GO:0030018 | 4.79E-02 | 1.09E-01 |

**Table S4.** All Enriched Molecular function.

| GO_Name                                                               | GO_ID      | Pvalue   | Pvalue_adjusted |
|-----------------------------------------------------------------------|------------|----------|-----------------|
| protein binding                                                       | GO:0005515 | 2.07E-11 | 9.90E-09        |
| enzyme binding                                                        | GO:0019899 | 1.93E-07 | 4.62E-05        |
| binding                                                               | GO:0005488 | 1.04E-05 | 1.66E-03        |
| phosphoprotein binding                                                | GO:0051219 | 4.75E-05 | 5.67E-03        |
| carboxylic acid binding                                               | GO:0031406 | 5.50E-04 | 3.14E-02        |
| organic acid binding                                                  | GO:0043177 | 5.59E-04 | 3.14E-02        |
| nuclear hormone receptor binding                                      | GO:0035257 | 7.78E-04 | 3.14E-02        |
| receptor binding                                                      | GO:0005102 | 1.06E-03 | 3.14E-02        |
| lipid binding                                                         | GO:0008289 | 1.07E-03 | 3.14E-02        |
| steroid hormone receptor binding                                      | GO:0035258 | 1.07E-03 | 3.14E-02        |
| modified amino acid binding                                           | GO:0072341 | 1.25E-03 | 3.14E-02        |
| histone acetyltransferase binding                                     | GO:0035035 | 1.57E-03 | 3.14E-02        |
| hydrolase activity, acting on ester bonds                             | GO:0016788 | 1.78E-03 | 3.14E-02        |
| ubiquitin-like protein ligase binding                                 | GO:0044389 | 1.97E-03 | 3.14E-02        |
| lipopolysaccharide binding                                            | GO:0001530 | 2.07E-03 | 3.14E-02        |
| hormone receptor binding                                              | GO:0051427 | 2.08E-03 | 3.14E-02        |
| sterol-4-alpha-carboxylate 3-dehydrogenase (decarboxylating) activity | GO:0047012 | 2.16E-03 | 3.14E-02        |
| phosphocholine phosphatase activity                                   | GO:0052731 | 2.16E-03 | 3.14E-02        |
| bis(5'-nucleosyl)-tetraphosphatase (symmetrical) activity             | GO:0008803 | 2.16E-03 | 3.14E-02        |
| C-3 sterol dehydrogenase (C-4 sterol decarboxylase) activity          | GO:0000252 | 2.16E-03 | 3.14E-02        |
| arginine deiminase activity                                           | GO:0016990 | 2.16E-03 | 3.14E-02        |
| triacyl lipopeptide binding                                           | GO:0042497 | 2.16E-03 | 3.14E-02        |
| amylase activity                                                      | GO:0004135 | 2.16E-03 | 3.14E-02        |
| cob(II)yrinic acid a,c-diamide adenosyltransferase activity           | GO:0008817 | 2.16E-03 | 3.14E-02        |
| 8-hydroxy-dADP phosphatase activity                                   | GO:0044717 | 2.16E-03 | 3.14E-02        |
| iron chaperone activity                                               | GO:0034986 | 2.16E-03 | 3.14E-02        |
| 8-oxo-GDP phosphatase activity                                        | GO:0044716 | 2.16E-03 | 3.14E-02        |
| glycogen debranching enzyme activity                                  | GO:0004133 | 2.16E-03 | 3.14E-02        |
| 4-alpha-glucanotransferase activity                                   | GO:0004134 | 2.16E-03 | 3.14E-02        |
| folate reductase activity                                             | GO:0033560 | 2.16E-03 | 3.14E-02        |
| xylulokinase activity                                                 | GO:0004856 | 2.16E-03 | 3.14E-02        |
| phosphoethanolamine phosphatase activity                              | GO:0052732 | 2.16E-03 | 3.14E-02        |
| hormone-sensitive lipase activity                                     | GO:0033878 | 2.16E-03 | 3.14E-02        |
| lipase activity                                                       | GO:0016298 | 2.50E-03 | 3.52E-02        |

|                                                                               |            |          |          |
|-------------------------------------------------------------------------------|------------|----------|----------|
| catalytic activity                                                            | GO:0003824 | 2.79E-03 | 3.81E-02 |
| protease binding                                                              | GO:0002020 | 3.27E-03 | 4.34E-02 |
| phosphatidylserine binding                                                    | GO:0001786 | 3.43E-03 | 4.41E-02 |
| triglyceride lipase activity                                                  | GO:0004806 | 3.60E-03 | 4.41E-02 |
| oxidoreductase activity, oxidizing metal ions                                 | GO:0016722 | 3.60E-03 | 4.41E-02 |
| estrogen receptor binding                                                     | GO:0030331 | 4.13E-03 | 4.49E-02 |
| bis(5'-nucleosyl)-tetraphosphatase activity                                   | GO:0008796 | 4.32E-03 | 4.49E-02 |
| 8-oxo-dGDP phosphatase activity                                               | GO:0044715 | 4.32E-03 | 4.49E-02 |
| N-acetylgalactosamine-4-sulfatase activity                                    | GO:0003943 | 4.32E-03 | 4.49E-02 |
| diacyl lipopeptide binding                                                    | GO:0042498 | 4.32E-03 | 4.49E-02 |
| acyloxyacyl hydrolase activity                                                | GO:0050528 | 4.32E-03 | 4.49E-02 |
| bis(5'-nucleosyl)-tetraphosphatase (asymmetrical) activity                    | GO:0004081 | 4.32E-03 | 4.49E-02 |
| scaffold protein binding                                                      | GO:0097110 | 5.94E-03 | 5.84E-02 |
| hydrolase activity                                                            | GO:0016787 | 6.28E-03 | 5.84E-02 |
| CD40 receptor binding                                                         | GO:0005174 | 6.48E-03 | 5.84E-02 |
| methotrexate binding                                                          | GO:0051870 | 6.48E-03 | 5.84E-02 |
| insulin-like growth factor-activated receptor activity                        | GO:0005010 | 6.48E-03 | 5.84E-02 |
| interleukin-8 receptor binding                                                | GO:0005153 | 6.48E-03 | 5.84E-02 |
| 5'-3' exonuclease activity                                                    | GO:0004534 | 6.48E-03 | 5.84E-02 |
| protein-arginine omega-N symmetric methyltransferase activity                 | GO:0035243 | 8.63E-03 | 7.24E-02 |
| N-acetyllactosamine synthase activity                                         | GO:0003945 | 8.63E-03 | 7.24E-02 |
| ribonuclease A activity                                                       | GO:0004522 | 8.63E-03 | 7.24E-02 |
| dihydrofolate reductase activity                                              | GO:0004146 | 8.63E-03 | 7.24E-02 |
| actin filament binding                                                        | GO:0051015 | 9.05E-03 | 7.46E-02 |
| magnesium ion binding                                                         | GO:0000287 | 1.04E-02 | 8.45E-02 |
| lipopolysaccharide receptor activity                                          | GO:0001875 | 1.08E-02 | 8.47E-02 |
| protein C-terminus binding                                                    | GO:0008022 | 1.08E-02 | 8.47E-02 |
| monocarboxylic acid binding                                                   | GO:0033293 | 1.13E-02 | 8.72E-02 |
| NADP binding                                                                  | GO:0050661 | 1.19E-02 | 8.99E-02 |
| transcription coactivator activity                                            | GO:0003713 | 1.20E-02 | 8.99E-02 |
| ion binding                                                                   | GO:0043167 | 1.25E-02 | 9.08E-02 |
| protein-arginine deiminase activity                                           | GO:0004668 | 1.29E-02 | 9.08E-02 |
| lipoteichoic acid binding                                                     | GO:0070891 | 1.29E-02 | 9.08E-02 |
| alpha-glucosidase activity                                                    | GO:0090599 | 1.29E-02 | 9.08E-02 |
| connexin binding                                                              | GO:0071253 | 1.51E-02 | 1.04E-01 |
| oxidoreductase activity                                                       | GO:0016491 | 1.55E-02 | 1.06E-01 |
| actin binding                                                                 | GO:0003779 | 1.58E-02 | 1.06E-01 |
| carboxylic ester hydrolase activity                                           | GO:0052689 | 1.70E-02 | 1.08E-01 |
| beta-N-acetylglucosaminylglycopeptide beta-1,4-galactosyltransferase activity | GO:0003831 | 1.72E-02 | 1.08E-01 |
| sequence-specific mRNA binding                                                | GO:1990825 | 1.72E-02 | 1.08E-01 |
| arginine binding                                                              | GO:0034618 | 1.72E-02 | 1.08E-01 |

|                                                                   |            |          |          |
|-------------------------------------------------------------------|------------|----------|----------|
| metallochaperone activity                                         | GO:0016530 | 1.72E-02 | 1.08E-01 |
| amide binding                                                     | GO:0033218 | 1.90E-02 | 1.18E-01 |
| sphingomyelin phosphodiesterase activity                          | GO:0004767 | 1.93E-02 | 1.18E-01 |
| phospholipid binding                                              | GO:0005543 | 2.09E-02 | 1.26E-01 |
| metal ion binding                                                 | GO:0046872 | 2.14E-02 | 1.26E-01 |
| lipopeptide binding                                               | GO:0071723 | 2.14E-02 | 1.26E-01 |
| lipid transporter activity                                        | GO:0005319 | 2.16E-02 | 1.26E-01 |
| Rac GTPase binding                                                | GO:0048365 | 2.31E-02 | 1.28E-01 |
| non-membrane spanning protein tyrosine kinase activity            | GO:0004715 | 2.35E-02 | 1.28E-01 |
| lipoprotein lipase activity                                       | GO:0004465 | 2.36E-02 | 1.28E-01 |
| histone demethylase activity (H3-K36 specific)                    | GO:0051864 | 2.36E-02 | 1.28E-01 |
| Toll-like receptor binding                                        | GO:0035325 | 2.36E-02 | 1.28E-01 |
| m7G(5')pppN diphosphatase activity                                | GO:0050072 | 2.36E-02 | 1.28E-01 |
| glycosaminoglycan binding                                         | GO:0005539 | 2.53E-02 | 1.31E-01 |
| oxidoreductase activity, oxidizing metal ions, oxygen as acceptor | GO:0016724 | 2.57E-02 | 1.31E-01 |
| ferroxidase activity                                              | GO:0004322 | 2.57E-02 | 1.31E-01 |
| cation binding                                                    | GO:0043169 | 2.65E-02 | 1.31E-01 |
| sphingolipid transporter activity                                 | GO:0046624 | 2.78E-02 | 1.31E-01 |
| peptidoglycan binding                                             | GO:0042834 | 2.78E-02 | 1.31E-01 |
| adenyl-nucleotide exchange factor activity                        | GO:0000774 | 2.78E-02 | 1.31E-01 |
| cupric reductase activity                                         | GO:0008823 | 2.78E-02 | 1.31E-01 |
| ferric-chelate reductase (NADPH) activity                         | GO:0052851 | 2.78E-02 | 1.31E-01 |
| arylsulfatase activity                                            | GO:0004065 | 2.78E-02 | 1.31E-01 |
| 3-beta-hydroxy-delta5-steroid dehydrogenase activity              | GO:0003854 | 2.78E-02 | 1.31E-01 |
| C-C chemokine binding                                             | GO:0019957 | 2.78E-02 | 1.31E-01 |
| small GTPase binding                                              | GO:0031267 | 2.79E-02 | 1.31E-01 |
| ion channel binding                                               | GO:0044325 | 2.80E-02 | 1.31E-01 |
| amino acid binding                                                | GO:0016597 | 2.85E-02 | 1.32E-01 |
| kinase binding                                                    | GO:0019900 | 2.87E-02 | 1.32E-01 |
| molecular transducer activity                                     | GO:0060089 | 2.90E-02 | 1.32E-01 |
| NADPH binding                                                     | GO:0070402 | 2.99E-02 | 1.34E-01 |
| translation repressor activity, nucleic acid binding              | GO:0000900 | 2.99E-02 | 1.34E-01 |
| acylglycerol lipase activity                                      | GO:0047372 | 3.20E-02 | 1.34E-01 |
| nucleoside-diphosphatase activity                                 | GO:0017110 | 3.20E-02 | 1.34E-01 |
| low-density lipoprotein particle binding                          | GO:0030169 | 3.20E-02 | 1.34E-01 |
| histone demethylase activity (H3-K9 specific)                     | GO:0032454 | 3.20E-02 | 1.34E-01 |
| adenosine-phosphate deaminase activity                            | GO:0047623 | 3.20E-02 | 1.34E-01 |
| superoxide-generating NADPH oxidase activator activity            | GO:0016176 | 3.20E-02 | 1.34E-01 |
| AMP deaminase activity                                            | GO:0003876 | 3.20E-02 | 1.34E-01 |



|                                                                                           |            |          |          |
|-------------------------------------------------------------------------------------------|------------|----------|----------|
| intracellular calcium activated chloride channel activity                                 | GO:0005229 | 3.41E-02 | 1.38E-01 |
| low-density lipoprotein receptor activity                                                 | GO:0005041 | 3.41E-02 | 1.38E-01 |
| glucocorticoid receptor binding                                                           | GO:0035259 | 3.41E-02 | 1.38E-01 |
| integrin binding                                                                          | GO:0005178 | 3.43E-02 | 1.38E-01 |
| anion binding                                                                             | GO:0043168 | 3.52E-02 | 1.38E-01 |
| GTPase binding                                                                            | GO:0051020 | 3.53E-02 | 1.38E-01 |
| N,N-dimethylaniline monooxygenase activity                                                | GO:0004499 | 3.62E-02 | 1.38E-01 |
| signaling pattern recognition receptor activity                                           | GO:0008329 | 3.62E-02 | 1.38E-01 |
| pattern recognition receptor activity                                                     | GO:0038187 | 3.62E-02 | 1.38E-01 |
| transmembrane receptor protein phosphatase activity                                       | GO:0019198 | 3.62E-02 | 1.38E-01 |
| transmembrane receptor protein tyrosine phosphatase activity                              | GO:0005001 | 3.62E-02 | 1.38E-01 |
| phospholipid transporter activity                                                         | GO:0005548 | 3.81E-02 | 1.41E-01 |
| MHC class I protein binding                                                               | GO:0042288 | 3.83E-02 | 1.41E-01 |
| glucosidase activity                                                                      | GO:0015926 | 3.83E-02 | 1.41E-01 |
| C-C chemokine receptor activity                                                           | GO:0016493 | 3.83E-02 | 1.41E-01 |
| superoxide-generating NADPH oxidase activity                                              | GO:0016175 | 3.83E-02 | 1.41E-01 |
| 1-acylglycerol-3-phosphate O-acyltransferase activity                                     | GO:0003841 | 4.03E-02 | 1.45E-01 |
| CXCR chemokine receptor binding                                                           | GO:0045236 | 4.03E-02 | 1.45E-01 |
| hydrolase activity, acting on carbon-nitrogen (but not peptide) bonds, in linear amidines | GO:0016813 | 4.03E-02 | 1.45E-01 |
| cytoskeletal protein binding                                                              | GO:0008092 | 4.11E-02 | 1.47E-01 |
| lipoprotein particle receptor activity                                                    | GO:0030228 | 4.24E-02 | 1.50E-01 |
| lysophosphatidic acid acyltransferase activity                                            | GO:0042171 | 4.45E-02 | 1.55E-01 |
| lysophospholipid acyltransferase activity                                                 | GO:0071617 | 4.45E-02 | 1.55E-01 |
| neurexin family protein binding                                                           | GO:0042043 | 4.66E-02 | 1.57E-01 |
| ferric iron binding                                                                       | GO:0008199 | 4.66E-02 | 1.57E-01 |
| insulin-like growth factor II binding                                                     | GO:0031995 | 4.66E-02 | 1.57E-01 |
| nucleotide diphosphatase activity                                                         | GO:0004551 | 4.66E-02 | 1.57E-01 |
| telomerase RNA binding                                                                    | GO:0070034 | 4.66E-02 | 1.57E-01 |
| phosphoric ester hydrolase activity                                                       | GO:0042578 | 4.71E-02 | 1.57E-01 |

**Table S5.** All Enriched KEGG pathway.

| Pathway Name                     | Pathway ID | Pvalue   | Pvalue_adjusted | Count | Pop Hit |
|----------------------------------|------------|----------|-----------------|-------|---------|
| Tuberculosis                     | hsa05152   | 1.04E-04 | 8.44E-03        | 7     | 179     |
| Bladder cancer                   | hsa05219   | 1.13E-04 | 8.44E-03        | 4     | 41      |
| Lysosome                         | hsa04142   | 9.35E-04 | 4.67E-02        | 5     | 123     |
| Regulation of actin cytoskeleton | hsa04810   | 2.00E-03 | 6.52E-02        | 6     | 215     |
| Rheumatoid arthritis             | hsa05323   | 2.37E-03 | 6.52E-02        | 4     | 91      |
| Phagosome                        | hsa04145   | 2.61E-03 | 6.52E-02        | 5     | 155     |
| Malaria                          | hsa05144   | 3.41E-03 | 7.31E-02        | 3     | 49      |

|                                                            |          |          |          |    |      |
|------------------------------------------------------------|----------|----------|----------|----|------|
| Legionellosis                                              | hsa05134 | 4.73E-03 | 8.88E-02 | 3  | 55   |
| Shigellosis                                                | hsa05131 | 7.55E-03 | 1.17E-01 | 3  | 65   |
| Viral carcinogenesis                                       | hsa05203 | 8.52E-03 | 1.17E-01 | 5  | 205  |
| Epithelial cell signaling in Helicobacter pylori infection | hsa05120 | 8.55E-03 | 1.17E-01 | 3  | 68   |
| Adherens junction                                          | hsa04520 | 1.08E-02 | 1.20E-01 | 3  | 74   |
| Leishmaniasis                                              | hsa05140 | 1.08E-02 | 1.20E-01 | 3  | 74   |
| Pertussis                                                  | hsa05133 | 1.12E-02 | 1.20E-01 | 3  | 75   |
| Hepatitis B                                                | hsa05161 | 1.26E-02 | 1.26E-01 | 4  | 146  |
| Axon guidance                                              | hsa04360 | 2.34E-02 | 2.03E-01 | 4  | 176  |
| Amoebiasis                                                 | hsa05146 | 2.40E-02 | 2.03E-01 | 3  | 100  |
| Chagas disease (American trypanosomiasis)                  | hsa05142 | 2.66E-02 | 2.03E-01 | 3  | 104  |
| Porphyrin and chlorophyll metabolism                       | hsa00860 | 2.79E-02 | 2.03E-01 | 2  | 42   |
| Toll-like receptor signaling pathway                       | hsa04620 | 2.79E-02 | 2.03E-01 | 3  | 106  |
| Chemokine signaling pathway                                | hsa04062 | 2.84E-02 | 2.03E-01 | 4  | 187  |
| TNF signaling pathway                                      | hsa04668 | 3.07E-02 | 2.10E-01 | 3  | 110  |
| Metabolic pathways                                         | hsa01100 | 3.47E-02 | 2.11E-01 | 13 | 1239 |
| Leukocyte transendothelial migration                       | hsa04670 | 3.67E-02 | 2.11E-01 | 3  | 118  |
| Focal adhesion                                             | hsa04510 | 3.68E-02 | 2.11E-01 | 4  | 203  |
| Toxoplasmosis                                              | hsa05145 | 3.75E-02 | 2.11E-01 | 3  | 119  |
| Proteoglycans in cancer                                    | hsa05205 | 3.80E-02 | 2.11E-01 | 4  | 205  |
| Platelet activation                                        | hsa04611 | 3.99E-02 | 2.14E-01 | 3  | 122  |
| NOD-like receptor signaling pathway                        | hsa04621 | 4.88E-02 | 2.53E-01 | 2  | 57   |
| VEGF signaling pathway                                     | hsa04370 | 5.51E-02 | 2.76E-01 | 2  | 61   |
| Phospholipase D signaling pathway                          | hsa04072 | 6.01E-02 | 2.91E-01 | 3  | 144  |
| Prolactin signaling pathway                                | hsa04917 | 7.38E-02 | 3.30E-01 | 2  | 72   |
| PPAR signaling pathway                                     | hsa03320 | 7.38E-02 | 3.30E-01 | 2  | 72   |
| Oxytocin signaling pathway                                 | hsa04921 | 7.49E-02 | 3.30E-01 | 3  | 158  |
| Folate biosynthesis                                        | hsa00790 | 8.39E-02 | 3.60E-01 | 1  | 14   |
| Glycosaminoglycan biosynthesis - keratan sulfate           | hsa00533 | 8.96E-02 | 3.69E-01 | 1  | 15   |
| Purine metabolism                                          | hsa00230 | 9.62E-02 | 3.69E-01 | 3  | 176  |
| Salmonella infection                                       | hsa05132 | 1.00E-01 | 3.69E-01 | 2  | 86   |
| Transcriptional misregulation in cancer                    | hsa05202 | 1.01E-01 | 3.69E-01 | 3  | 180  |
| Gap junction                                               | hsa04540 | 1.04E-01 | 3.69E-01 | 2  | 88   |
| ErbB signaling pathway                                     | hsa04012 | 1.04E-01 | 3.69E-01 | 2  | 88   |
| GnRH signaling pathway                                     | hsa04912 | 1.10E-01 | 3.69E-01 | 2  | 91   |
| Glycosaminoglycan degradation                              | hsa00531 | 1.12E-01 | 3.69E-01 | 1  | 19   |
| Fc gamma R-mediated phagocytosis                           | hsa04666 | 1.14E-01 | 3.69E-01 | 2  | 93   |

|                                                            |          |          |          |   |     |
|------------------------------------------------------------|----------|----------|----------|---|-----|
| NF-kappa B signaling pathway                               | hsa04064 | 1.14E-01 | 3.69E-01 | 2 | 93  |
| One carbon pool by folate                                  | hsa00670 | 1.18E-01 | 3.69E-01 | 1 | 20  |
| Steroid biosynthesis                                       | hsa00100 | 1.18E-01 | 3.69E-01 | 1 | 20  |
| Glycerophospholipid metabolism                             | hsa00564 | 1.18E-01 | 3.69E-01 | 2 | 95  |
| Estrogen signaling pathway                                 | hsa04915 | 1.26E-01 | 3.76E-01 | 2 | 99  |
| cAMP signaling pathway                                     | hsa04024 | 1.26E-01 | 3.76E-01 | 3 | 199 |
| Melanogenesis                                              | hsa04916 | 1.28E-01 | 3.76E-01 | 2 | 100 |
| AGE-RAGE signaling pathway in diabetic complications       | hsa04933 | 1.30E-01 | 3.76E-01 | 2 | 101 |
| Protein export                                             | hsa03060 | 1.34E-01 | 3.79E-01 | 1 | 23  |
| T cell receptor signaling pathway                          | hsa04660 | 1.39E-01 | 3.79E-01 | 2 | 105 |
| Pyrimidine metabolism                                      | hsa00240 | 1.39E-01 | 3.79E-01 | 2 | 105 |
| Glycosphingolipid biosynthesis - lacto and neolacto series | hsa00601 | 1.50E-01 | 4.03E-01 | 1 | 26  |
| Collecting duct acid secretion                             | hsa04966 | 1.56E-01 | 4.10E-01 | 1 | 27  |
| Dorso-ventral axis formation                               | hsa04320 | 1.61E-01 | 4.16E-01 | 1 | 28  |
| Thyroid cancer                                             | hsa05216 | 1.66E-01 | 4.18E-01 | 1 | 29  |
| Thyroid hormone signaling pathway                          | hsa04919 | 1.67E-01 | 4.18E-01 | 2 | 118 |
| Vascular smooth muscle contraction                         | hsa04270 | 1.72E-01 | 4.22E-01 | 2 | 120 |
| Asthma                                                     | hsa05310 | 1.82E-01 | 4.28E-01 | 1 | 32  |
| Apoptosis - multiple species                               | hsa04215 | 1.87E-01 | 4.28E-01 | 1 | 33  |
| Prion diseases                                             | hsa05020 | 1.97E-01 | 4.28E-01 | 1 | 35  |
| Osteoclast differentiation                                 | hsa04380 | 1.99E-01 | 4.28E-01 | 2 | 132 |
| Hepatitis C                                                | hsa05160 | 2.01E-01 | 4.28E-01 | 2 | 133 |
| Pentose and glucuronate interconversions                   | hsa00040 | 2.02E-01 | 4.28E-01 | 1 | 36  |
| DNA replication                                            | hsa03030 | 2.02E-01 | 4.28E-01 | 1 | 36  |
| Natural killer cell mediated cytotoxicity                  | hsa04650 | 2.06E-01 | 4.28E-01 | 2 | 135 |
| Primary immunodeficiency                                   | hsa05340 | 2.07E-01 | 4.28E-01 | 1 | 37  |
| Systemic lupus erythematosus                               | hsa05322 | 2.08E-01 | 4.28E-01 | 2 | 136 |
| Insulin signaling pathway                                  | hsa04910 | 2.15E-01 | 4.28E-01 | 2 | 139 |
| Tight junction                                             | hsa04530 | 2.15E-01 | 4.28E-01 | 2 | 139 |
| Apoptosis                                                  | hsa04210 | 2.17E-01 | 4.28E-01 | 2 | 140 |
| Allograft rejection                                        | hsa05330 | 2.17E-01 | 4.28E-01 | 1 | 39  |
| Aldosterone-regulated sodium reabsorption                  | hsa04960 | 2.17E-01 | 4.28E-01 | 1 | 39  |
| Signaling pathways regulating pluripotency of stem cells   | hsa04550 | 2.22E-01 | 4.32E-01 | 2 | 142 |

|                                              |          |          |          |   |     |
|----------------------------------------------|----------|----------|----------|---|-----|
| Cytokine-cytokine receptor interaction       | hsa04060 | 2.28E-01 | 4.38E-01 | 3 | 265 |
| Cell adhesion molecules (CAMs)               | hsa04514 | 2.31E-01 | 4.38E-01 | 2 | 146 |
| Pathways in cancer                           | hsa05200 | 2.33E-01 | 4.38E-01 | 4 | 397 |
| Non-alcoholic fatty liver disease (NAFLD)    | hsa04932 | 2.42E-01 | 4.49E-01 | 2 | 151 |
| Sphingolipid metabolism                      | hsa00600 | 2.55E-01 | 4.64E-01 | 1 | 47  |
| Notch signaling pathway                      | hsa04330 | 2.60E-01 | 4.64E-01 | 1 | 48  |
| Type II diabetes mellitus                    | hsa04930 | 2.60E-01 | 4.64E-01 | 1 | 48  |
| Intestinal immune network for IgA production | hsa04672 | 2.69E-01 | 4.70E-01 | 1 | 50  |
| Vibrio cholerae infection                    | hsa05110 | 2.74E-01 | 4.70E-01 | 1 | 51  |
| Endometrial cancer                           | hsa05213 | 2.78E-01 | 4.70E-01 | 1 | 52  |
| cGMP-PKG signaling pathway                   | hsa04022 | 2.80E-01 | 4.70E-01 | 2 | 167 |
| Alzheimer's disease                          | hsa05010 | 2.82E-01 | 4.70E-01 | 2 | 168 |
| Autoimmune thyroid disease                   | hsa05320 | 2.88E-01 | 4.70E-01 | 1 | 54  |
| Basal cell carcinoma                         | hsa05217 | 2.92E-01 | 4.70E-01 | 1 | 55  |
| Regulation of lipolysis in adipocytes        | hsa04923 | 2.96E-01 | 4.70E-01 | 1 | 56  |
| Non-small cell lung cancer                   | hsa05223 | 2.96E-01 | 4.70E-01 | 1 | 56  |
| Influenza A                                  | hsa05164 | 3.01E-01 | 4.70E-01 | 2 | 176 |
| Starch and sucrose metabolism                | hsa00500 | 3.01E-01 | 4.70E-01 | 1 | 57  |
| Acute myeloid leukemia                       | hsa05221 | 3.01E-01 | 4.70E-01 | 1 | 57  |
| Glycerolipid metabolism                      | hsa00561 | 3.10E-01 | 4.71E-01 | 1 | 59  |
| Viral myocarditis                            | hsa05416 | 3.14E-01 | 4.71E-01 | 1 | 60  |
| mTOR signaling pathway                       | hsa04150 | 3.14E-01 | 4.71E-01 | 1 | 60  |
| Long-term depression                         | hsa04730 | 3.14E-01 | 4.71E-01 | 1 | 60  |
| Colorectal cancer                            | hsa05210 | 3.23E-01 | 4.77E-01 | 1 | 62  |
| Synaptic vesicle cycle                       | hsa04721 | 3.27E-01 | 4.77E-01 | 1 | 63  |
| Glioma                                       | hsa05214 | 3.35E-01 | 4.77E-01 | 1 | 65  |
| Long-term potentiation                       | hsa04720 | 3.39E-01 | 4.77E-01 | 1 | 66  |
| Pancreatic cancer                            | hsa05212 | 3.39E-01 | 4.77E-01 | 1 | 66  |
| Inflammatory bowel disease (IBD)             | hsa05321 | 3.39E-01 | 4.77E-01 | 1 | 66  |
| Renal cell carcinoma                         | hsa05211 | 3.44E-01 | 4.77E-01 | 1 | 67  |
| Central carbon metabolism in cancer          | hsa05230 | 3.44E-01 | 4.77E-01 | 1 | 67  |
| Fc epsilon RI signaling pathway              | hsa04664 | 3.48E-01 | 4.79E-01 | 1 | 68  |
| Drug metabolism - cytochrome P450            | hsa00982 | 3.52E-01 | 4.80E-01 | 1 | 69  |
| RIG-I-like receptor signaling pathway        | hsa04622 | 3.56E-01 | 4.81E-01 | 1 | 70  |
| Melanoma                                     | hsa05218 | 3.60E-01 | 4.82E-01 | 1 | 71  |
| Chronic myeloid leukemia                     | hsa05220 | 3.68E-01 | 4.84E-01 | 1 | 73  |
| B cell receptor signaling pathway            | hsa04662 | 3.68E-01 | 4.84E-01 | 1 | 73  |

|                                                        |          |          |          |   |     |
|--------------------------------------------------------|----------|----------|----------|---|-----|
| Arrhythmogenic right ventricular cardiomyopathy (ARVC) | hsa05412 | 3.72E-01 | 4.85E-01 | 1 | 74  |
| Rap1 signaling pathway                                 | hsa04015 | 3.81E-01 | 4.92E-01 | 2 | 211 |
| RNA degradation                                        | hsa03018 | 3.84E-01 | 4.92E-01 | 1 | 77  |
| Bacterial invasion of epithelial cells                 | hsa05100 | 3.88E-01 | 4.93E-01 | 1 | 78  |
| Complement and coagulation cascades                    | hsa04610 | 3.92E-01 | 4.94E-01 | 1 | 79  |
| Aldosterone synthesis and secretion                    | hsa04925 | 3.99E-01 | 4.99E-01 | 1 | 81  |
| TGF-beta signaling pathway                             | hsa04350 | 4.11E-01 | 5.09E-01 | 1 | 84  |
| GABAergic synapse                                      | hsa04727 | 4.25E-01 | 5.23E-01 | 1 | 88  |
| Prostate cancer                                        | hsa05215 | 4.29E-01 | 5.23E-01 | 1 | 89  |
| Circadian entrainment                                  | hsa04713 | 4.50E-01 | 5.45E-01 | 1 | 95  |
| Progesterone-mediated oocyte maturation                | hsa04914 | 4.61E-01 | 5.48E-01 | 1 | 98  |
| Inflammatory mediator regulation of TRP channels       | hsa04750 | 4.61E-01 | 5.48E-01 | 1 | 98  |
| Retrograde endocannabinoid signaling                   | hsa04723 | 4.71E-01 | 5.52E-01 | 1 | 101 |
| Choline metabolism in cancer                           | hsa05231 | 4.71E-01 | 5.52E-01 | 1 | 101 |
| HIF-1 signaling pathway                                | hsa04066 | 4.77E-01 | 5.55E-01 | 1 | 103 |
| Endocytosis                                            | hsa04144 | 4.86E-01 | 5.61E-01 | 2 | 260 |
| Cholinergic synapse                                    | hsa04725 | 5.03E-01 | 5.75E-01 | 1 | 111 |
| Serotonergic synapse                                   | hsa04726 | 5.06E-01 | 5.75E-01 | 1 | 112 |
| Glutamatergic synapse                                  | hsa04724 | 5.13E-01 | 5.78E-01 | 1 | 114 |
| Neurotrophin signaling pathway                         | hsa04722 | 5.31E-01 | 5.93E-01 | 1 | 120 |
| Sphingolipid signaling pathway                         | hsa04071 | 5.34E-01 | 5.93E-01 | 1 | 121 |
| Oocyte meiosis                                         | hsa04114 | 5.40E-01 | 5.95E-01 | 1 | 123 |
| AMPK signaling pathway                                 | hsa04152 | 5.46E-01 | 5.97E-01 | 1 | 125 |
| Oxidative phosphorylation                              | hsa00190 | 5.68E-01 | 6.16E-01 | 1 | 133 |
| FoxO signaling pathway                                 | hsa04068 | 5.71E-01 | 6.16E-01 | 1 | 134 |
| Measles                                                | hsa05162 | 5.76E-01 | 6.18E-01 | 1 | 136 |
| Wnt signaling pathway                                  | hsa04310 | 5.95E-01 | 6.33E-01 | 1 | 143 |
| Adrenergic signaling in cardiomyocytes                 | hsa04261 | 6.10E-01 | 6.44E-01 | 1 | 149 |
| Hippo signaling pathway                                | hsa04390 | 6.22E-01 | 6.53E-01 | 1 | 154 |
| PI3K-Akt signaling pathway                             | hsa04151 | 6.37E-01 | 6.63E-01 | 2 | 342 |
| Protein processing in endoplasmic reticulum            | hsa04141 | 6.50E-01 | 6.73E-01 | 1 | 166 |
| Alcoholism                                             | hsa05034 | 6.78E-01 | 6.97E-01 | 1 | 179 |
| Herpes simplex infection                               | hsa05168 | 6.92E-01 | 7.07E-01 | 1 | 186 |
| Ras signaling pathway                                  | hsa04014 | 7.65E-01 | 7.76E-01 | 1 | 228 |
| MAPK signaling pathway                                 | hsa04010 | 8.03E-01 | 8.08E-01 | 1 | 255 |
| HTLV-I infection                                       | hsa05166 | 8.08E-01 | 8.08E-01 | 1 | 259 |

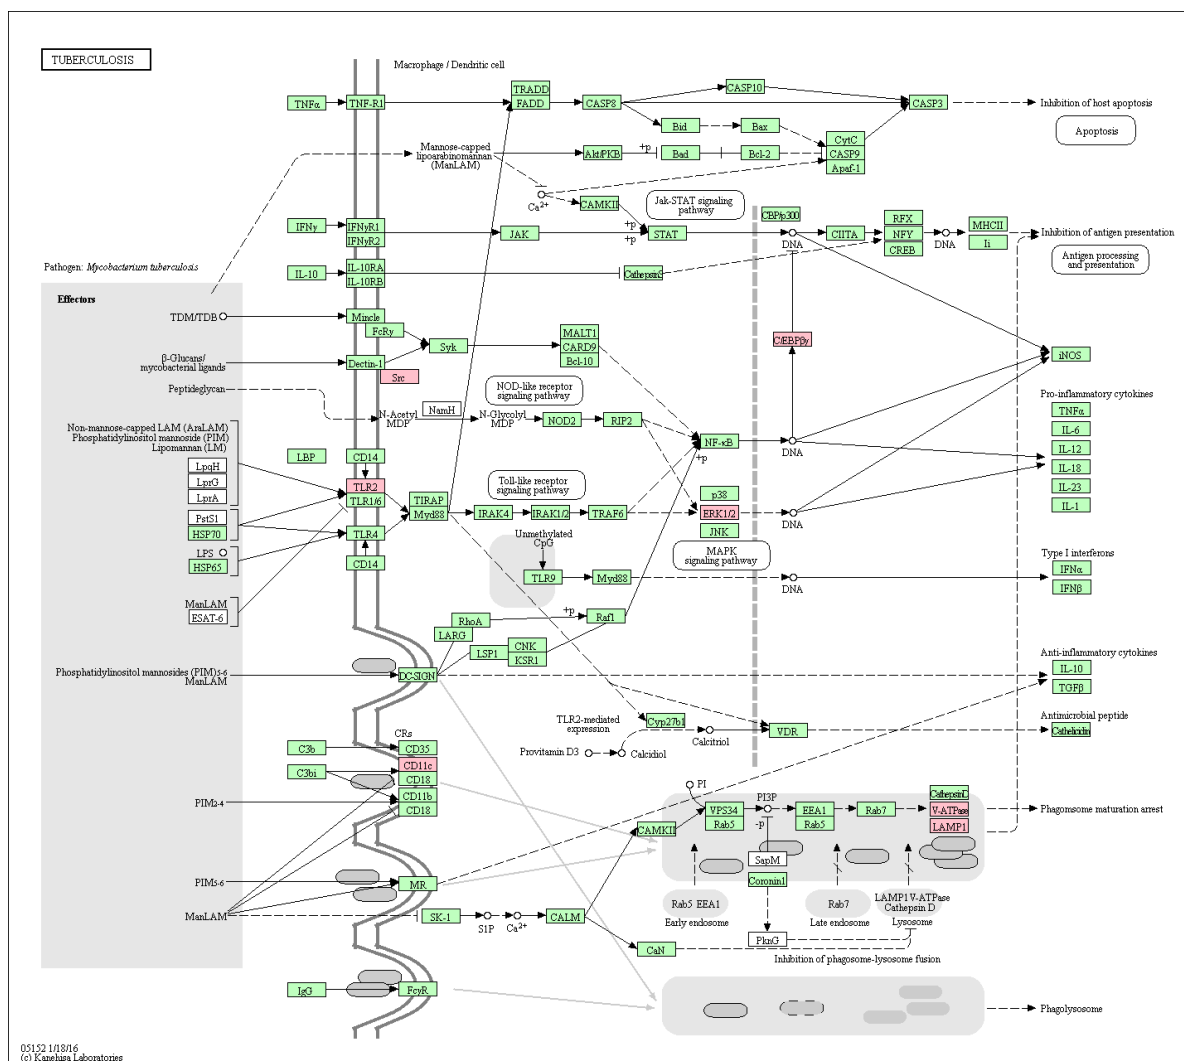

**Figure S2.** Overlapping differential proteins in KEGG pathway of Tuberculosis.

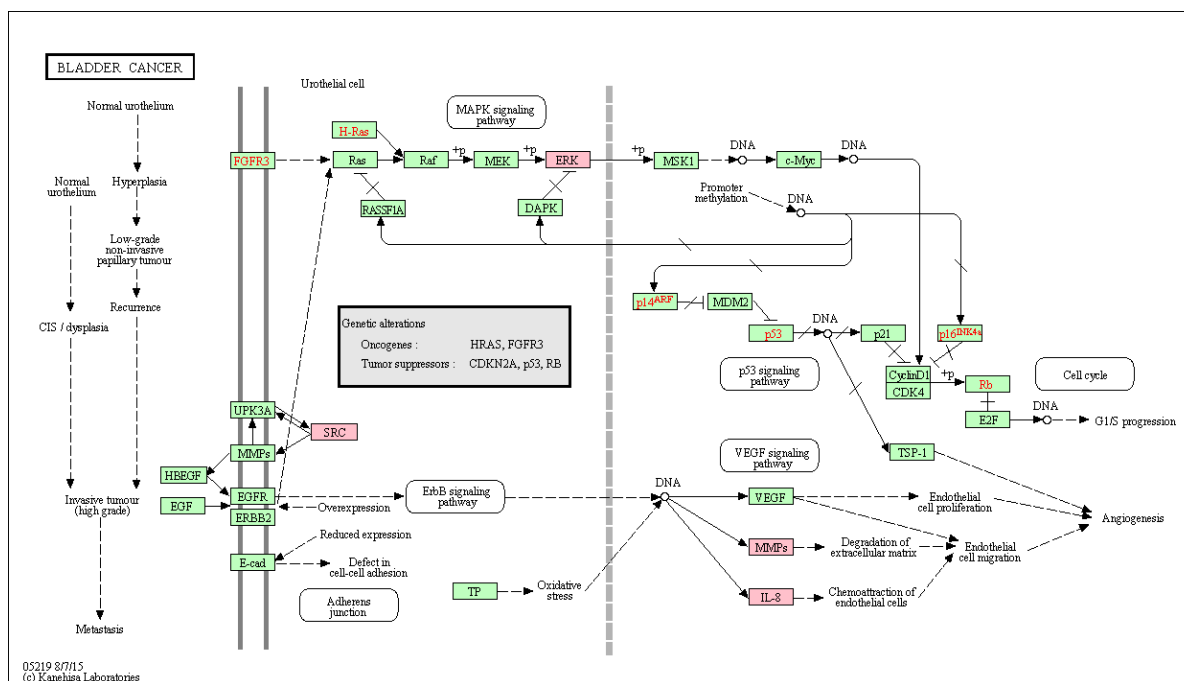

**Figure S3.** Overlapping differential proteins in KEGG pathway of Bladder cancer.

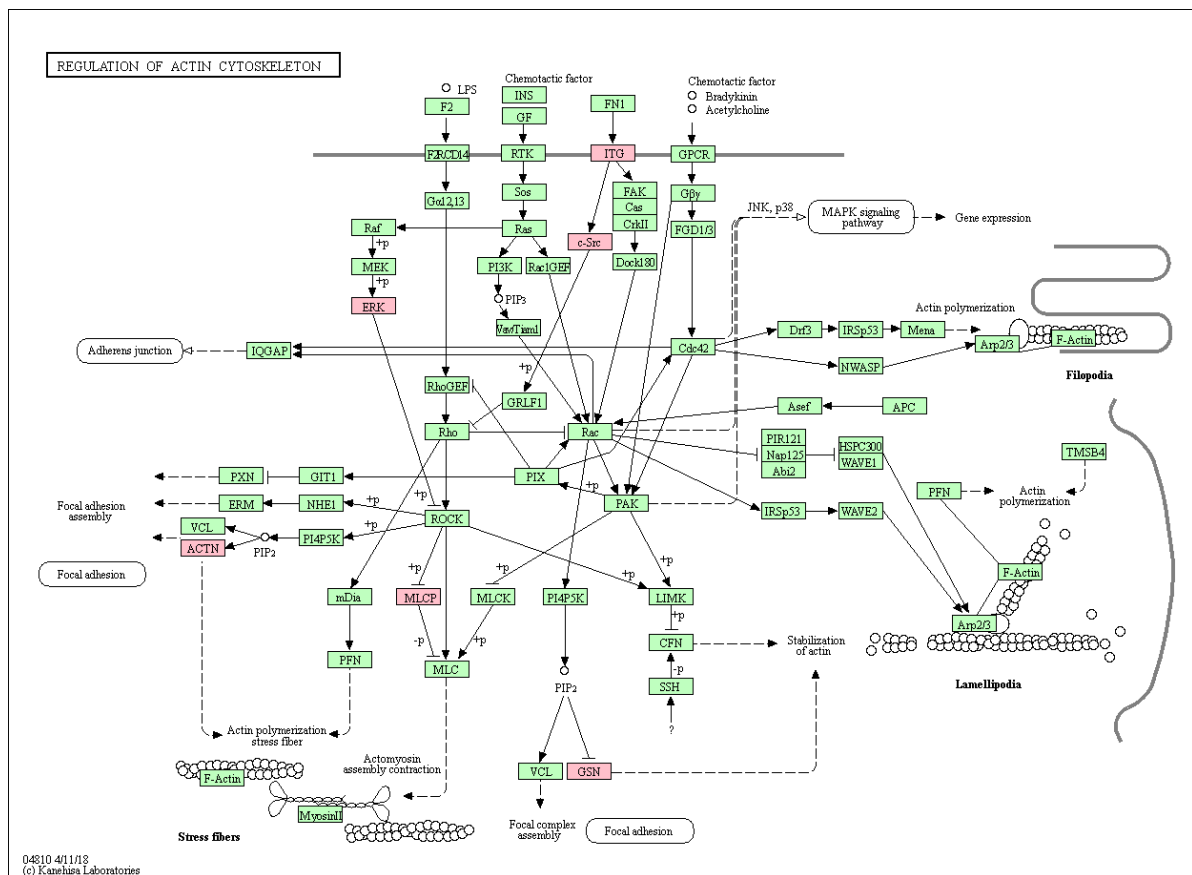

**Figure S4.** Overlapping differential proteins in KEGG pathway of Regulation of actin cytoskeleton.

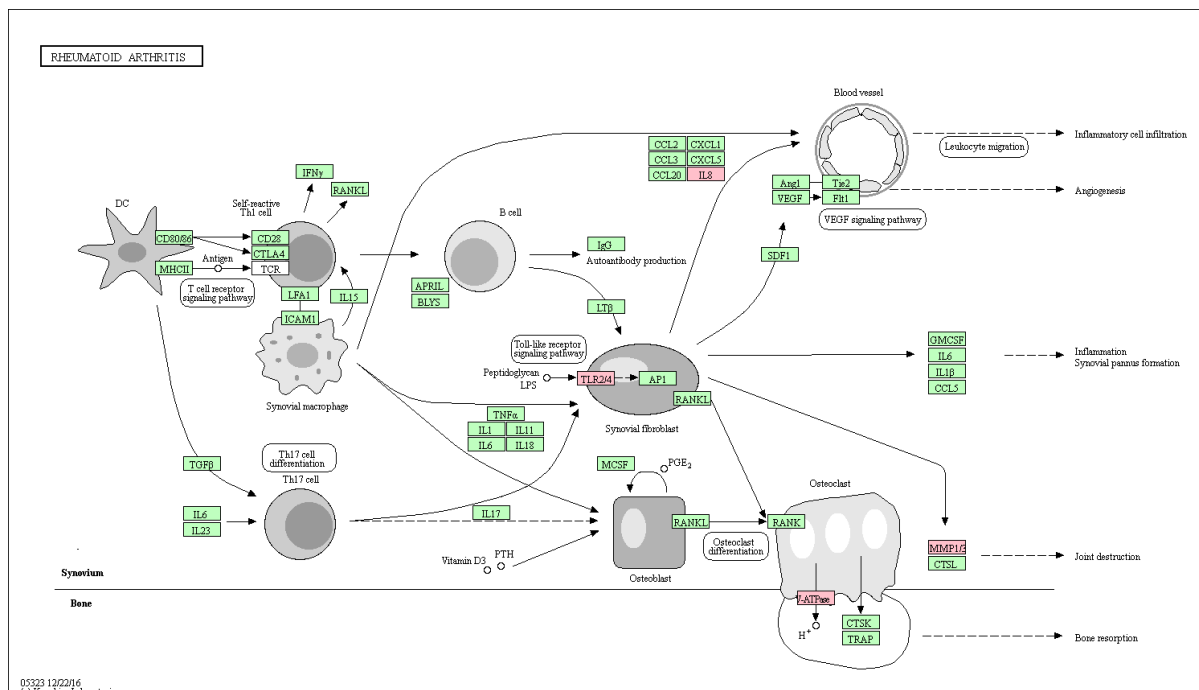

**Figure S5.** Overlapping differential proteins in KEGG pathway of Rheumatoid arthritis.

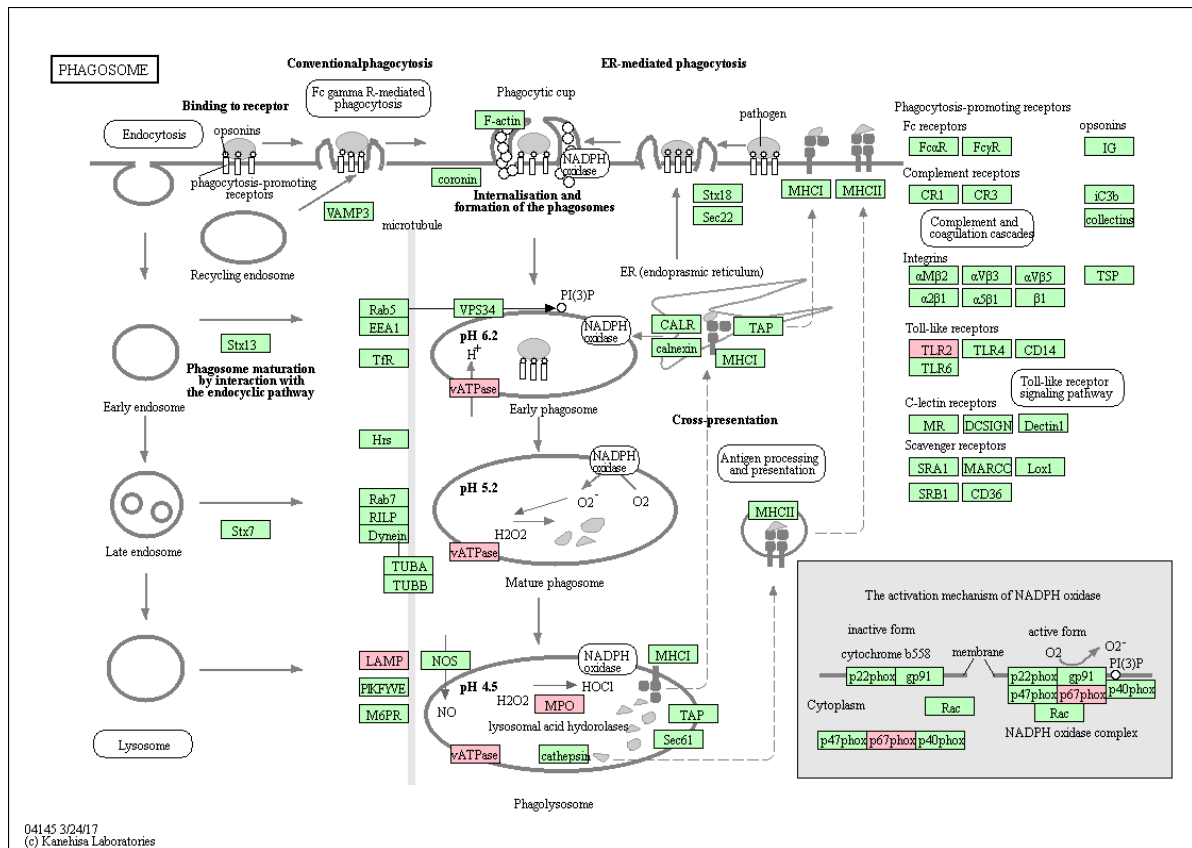

**Figure S6.** Overlapping differential proteins in KEGG pathway of Phagosome.
